# Supplementary material for: A 3,4-dimercapto-3-cyclobutene-1,2-dione-chelated ruthenium carbene catalyst for Z-stereoretentive/stereoselective olefin metathesis
Source: Royal Society of Chemistry journal article supplement (doi:10.1039/c9dt01016e), 2019-01-01
Supplement: c9dt01016e1.pdf [file c9dt01016e1.pdf]

## A 3,4-Dioxocyclobut-1-ene-1,2-Dithiolate Chelated Ruthenium Carbene Catalyst for Z-Stereoretentive/Stereoselective Olefin Metathesis

Tao Wang,<sup>a, b</sup> Qingxiao Xie,<sup>a, b</sup> Weijie Guo,<sup>a, b</sup> Shutao Wu,<sup>a, b</sup> Huiqing Zhang,<sup>a, b</sup> Jianhui Wang\*,<sup>a, b</sup> Botao Wu,<sup>\*, b, c, d</sup>

<sup>a</sup> Department of Chemistry, College of Science, Tianjin University, Tianjin 300350, P. R. China.

<sup>b</sup> Collaborative Innovation Center of Chemical Science and Engineering (Tianjin) 30072, P. R. China.

<sup>c</sup> School of Chemical Engineering & Technology, Tianjin University, Tianjin 300350, P. R. China.

<sup>d</sup> College of Chemistry and Molecular Engineering, Peking University, Beijing 100871, China.

### Table of Contents

|                                                                                                                               |    |
|-------------------------------------------------------------------------------------------------------------------------------|----|
| <b>Figure S1.</b> X-ray crystal structure and CCDC: 1585252.....                                                              | 3  |
| <b>Figure S2.</b> <sup>1</sup> H NMR spectrum of <b>8</b> in CDCl <sub>3</sub> (400 Hz).....                                  | 3  |
| <b>Figure S3.</b> <sup>13</sup> C{ <sup>1</sup> H} NMR spectrum of <b>8</b> in CDCl <sub>3</sub> (100 Hz).....                | 4  |
| <b>Figure S4.</b> <sup>1</sup> H NMR spectrum of <b>11</b> in CD <sub>2</sub> Cl <sub>2</sub> (400 Hz).....                   | 4  |
| <b>Figure S5.</b> <sup>13</sup> C{ <sup>1</sup> H} NMR spectrum of <b>11</b> in CD <sub>2</sub> Cl <sub>2</sub> (100 Hz)..... | 5  |
| <b>Figure S6.</b> <sup>1</sup> H NMR spectrum of <b>14</b> in CDCl <sub>3</sub> (400 Hz).....                                 | 5  |
| <b>Figure S7.</b> <sup>13</sup> C{ <sup>1</sup> H} NMR spectrum of <b>14</b> in CDCl <sub>3</sub> (100 Hz).....               | 6  |
| <b>Figure S8.</b> <sup>1</sup> H NMR spectrum of <b>15</b> in CDCl <sub>3</sub> (400 Hz).....                                 | 6  |
| <b>Figure S9.</b> <sup>13</sup> C{ <sup>1</sup> H} NMR spectrum of <b>15</b> in CDCl <sub>3</sub> (100 Hz).....               | 7  |
| <b>Figure S10.</b> <sup>1</sup> H NMR spectrum of <b>18a</b> in CDCl <sub>3</sub> (400 Hz).....                               | 7  |
| <b>Figure S11.</b> <sup>13</sup> C{ <sup>1</sup> H} NMR spectrum of <b>18a</b> in CDCl <sub>3</sub> (100 Hz).....             | 8  |
| <b>Figure S12.</b> <sup>1</sup> H NMR spectrum of <b>18b</b> in CDCl <sub>3</sub> (400 Hz).....                               | 8  |
| <b>Figure S13.</b> <sup>13</sup> C{ <sup>1</sup> H} NMR spectrum of <b>18b</b> in CDCl <sub>3</sub> (100 Hz).....             | 9  |
| <b>Figure S14.</b> <sup>1</sup> H NMR spectrum of <b>19a</b> in CDCl <sub>3</sub> (400 Hz).....                               | 9  |
| <b>Figure S15.</b> <sup>13</sup> C{ <sup>1</sup> H} NMR spectrum of <b>19a</b> in CDCl <sub>3</sub> (100 Hz).....             | 10 |
| <b>Figure S16.</b> <sup>1</sup> H NMR spectrum of <b>19b</b> in CDCl <sub>3</sub> (400 Hz).....                               | 10 |
| <b>Figure S17.</b> <sup>13</sup> C{ <sup>1</sup> H} NMR spectrum of <b>19b</b> in CDCl <sub>3</sub> (100 Hz).....             | 11 |
| <b>Figure S18.</b> <sup>1</sup> H NMR spectrum of <b>21</b> in CDCl <sub>3</sub> (400 Hz).....                                | 11 |
| <b>Figure S19.</b> <sup>13</sup> C{ <sup>1</sup> H} NMR spectrum of <b>21</b> in CDCl <sub>3</sub> (100 Hz).....              | 12 |
| <b>Figure S20.</b> <sup>1</sup> H NMR spectrum of <b>24</b> in CDCl <sub>3</sub> (400 Hz).....                                | 12 |
| <b>Figure S21.</b> <sup>13</sup> C{ <sup>1</sup> H} NMR spectrum of <b>24</b> in CDCl <sub>3</sub> (100 Hz).....              | 13 |
| <b>Figure S22.</b> <sup>1</sup> H NMR spectrum of <b>26</b> in CDCl <sub>3</sub> (400 Hz).....                                | 13 |
| <b>Figure S23.</b> <sup>13</sup> C{ <sup>1</sup> H} NMR spectrum of <b>26</b> in CDCl <sub>3</sub> (100 Hz).....              | 14 |
| <b>Figure S24.</b> <sup>1</sup> H NMR spectrum of <b>27</b> in CDCl <sub>3</sub> (400 Hz).....                                | 14 |
| <b>Figure S25.</b> <sup>13</sup> C{ <sup>1</sup> H} NMR spectrum of <b>27</b> in CDCl <sub>3</sub> (100 Hz).....              | 15 |
| <b>Figure S26.</b> <sup>1</sup> H NMR spectrum of <b>29</b> in CDCl <sub>3</sub> (400 Hz).....                                | 15 |
| <b>Figure S27.</b> <sup>13</sup> C{ <sup>1</sup> H} NMR spectrum of <b>29</b> in CDCl <sub>3</sub> (100 Hz).....              | 16 |
| <b>Figure S28.</b> <sup>1</sup> H NMR spectrum of <b>33</b> in CDCl <sub>3</sub> (400 Hz).....                                | 16 |
| <b>Figure S29.</b> <sup>13</sup> C{ <sup>1</sup> H} NMR spectrum of <b>33</b> in CDCl <sub>3</sub> (100 Hz).....              | 17 |
| <b>Figure S30.</b> <sup>1</sup> H NMR spectrum of <b>34</b> in CDCl <sub>3</sub> (400 Hz).....                                | 17 |

|                                                                                                                     |    |
|---------------------------------------------------------------------------------------------------------------------|----|
| <b>Figure S31.</b> $^{13}\text{C}\{^1\text{H}\}$ NMR spectrum of <b>34</b> in $\text{CDCl}_3$ (100 Hz) .....        | 18 |
| <b>Figure S32.</b> $^1\text{H}$ NMR spectrum of <b>35</b> in $\text{CDCl}_3$ (400 Hz) .....                         | 18 |
| <b>Figure S33.</b> $^{13}\text{C}\{^1\text{H}\}$ NMR spectrum of <b>35</b> in $\text{CDCl}_3$ (100 Hz) .....        | 19 |
| <b>Figure S34.</b> $^1\text{H}$ NMR spectrum of <b>36</b> in $\text{CDCl}_3$ (400 Hz) .....                         | 19 |
| <b>Figure S35.</b> $^{13}\text{C}\{^1\text{H}\}$ NMR spectrum of <b>36</b> in $\text{CDCl}_3$ (100 Hz) .....        | 20 |
| <b>Figure S36.</b> $^1\text{H}$ NMR spectrum of <b>37</b> in $\text{CDCl}_3$ (400 Hz) .....                         | 20 |
| <b>Figure S37.</b> $^{13}\text{C}\{^1\text{H}\}$ NMR spectrum of <b>37</b> in $\text{CDCl}_3$ (100 Hz) .....        | 21 |
| <b>Figure S38.</b> $^1\text{H}$ NMR spectrum of <b>38</b> in $\text{CDCl}_3$ (400 Hz) .....                         | 21 |
| <b>Figure S39.</b> $^{13}\text{C}\{^1\text{H}\}$ NMR spectrum of <b>38</b> in $\text{CDCl}_3$ (100 Hz) .....        | 22 |
| <b>Figure S40.</b> $^1\text{H}$ NMR spectrum of <b>23</b> in $\text{CDCl}_3$ (400 Hz) (18 <sup>th</sup> Days) ..... | 22 |
| <b>Figure S41.</b> $^1\text{H}$ NMR spectrum of <b>23</b> in $\text{CDCl}_3$ (400 Hz) (28 <sup>th</sup> Days) ..... | 23 |
| <b>Table S1.</b> Crystal data and structure refinement for Ru-based complex .....                                   | 23 |
| <b>Table S2.</b> Bond Lengths for Ru-based complex .....                                                            | 24 |
| <b>Table S3.</b> Bond Angles for Ru-based complex .....                                                             | 25 |
| <b>Table S4.</b> Torsion Angles for Ru-based complex .....                                                          | 26 |
| The data of DFT calculations .....                                                                                  | 28 |

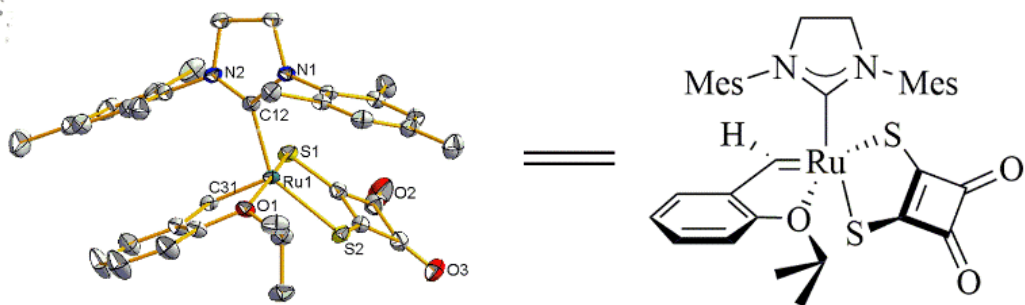

**Figure S1.** X-ray crystal structure and CCDC: 1585252.

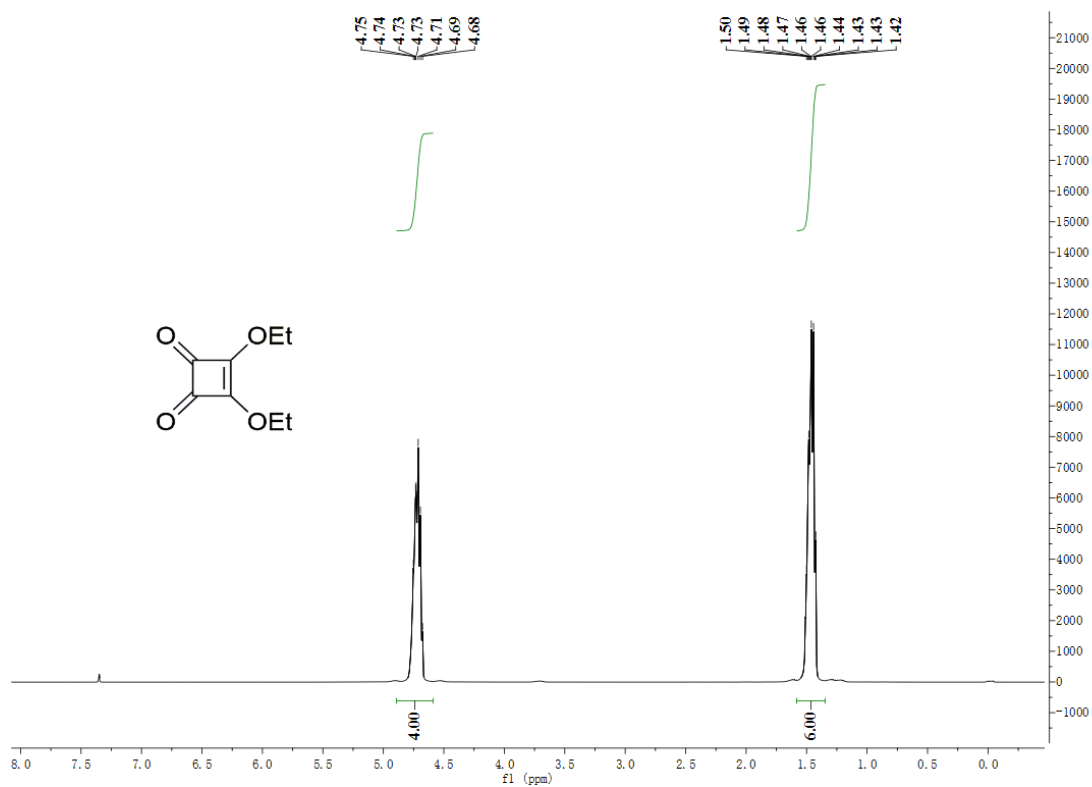

**Figure S2.** <sup>1</sup>H NMR spectrum of **8** in CDCl<sub>3</sub> (400 Hz)

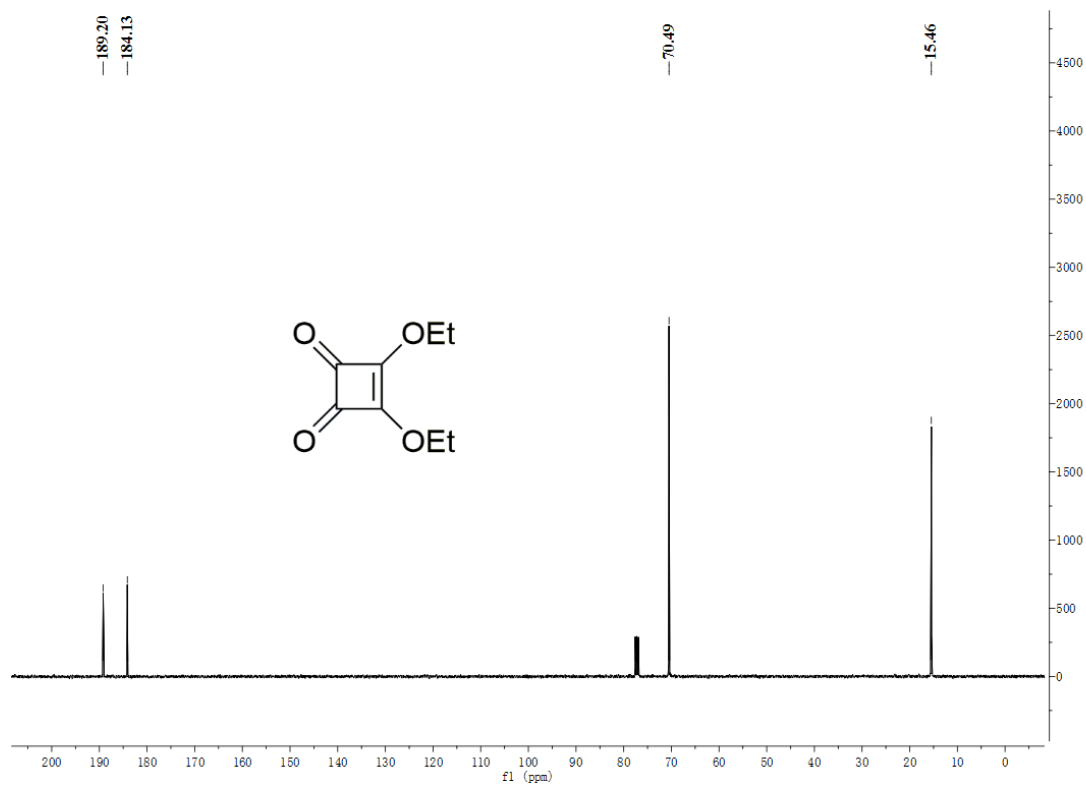

**Figure S3.**  $^{13}\text{C}\{^1\text{H}\}$  NMR spectrum of **8** in  $\text{CDCl}_3$  (100 Hz)

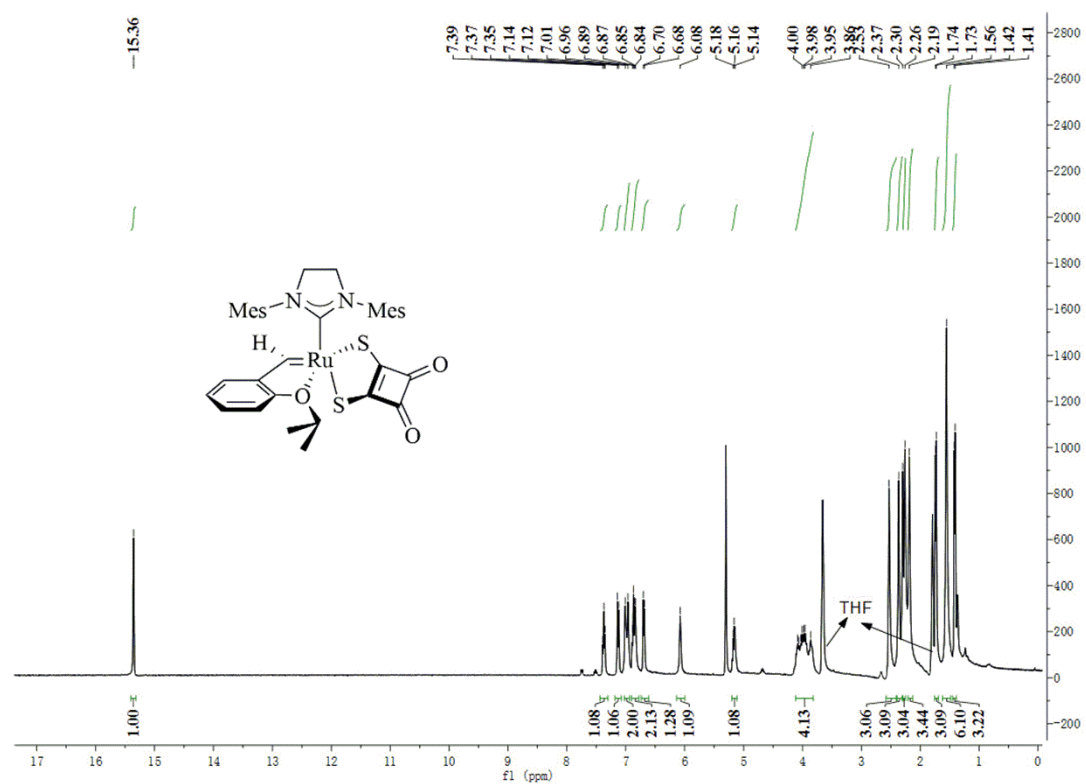

**Figure S4.**  $^1\text{H}$  NMR spectrum of **11** in  $\text{CD}_2\text{Cl}_2$  (400 Hz)

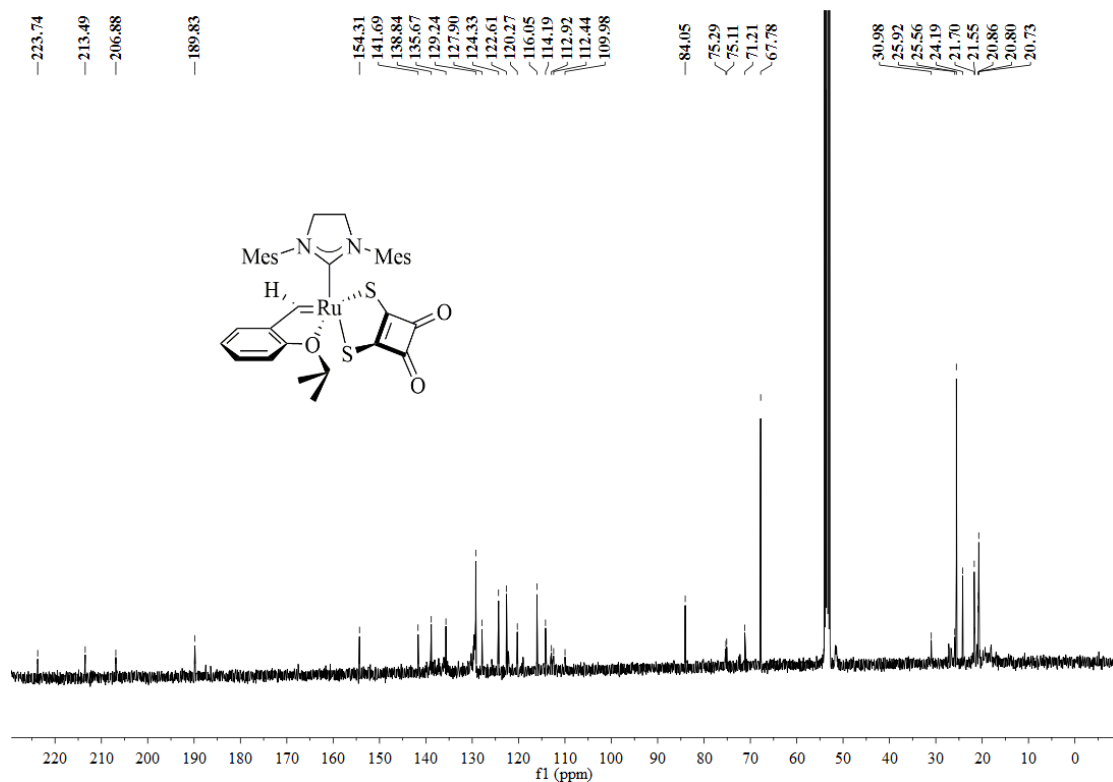

Figure S5.  $^{13}\text{C}\{^1\text{H}\}$  NMR spectrum of **11** in  $\text{CD}_2\text{Cl}_2$  (100 Hz)

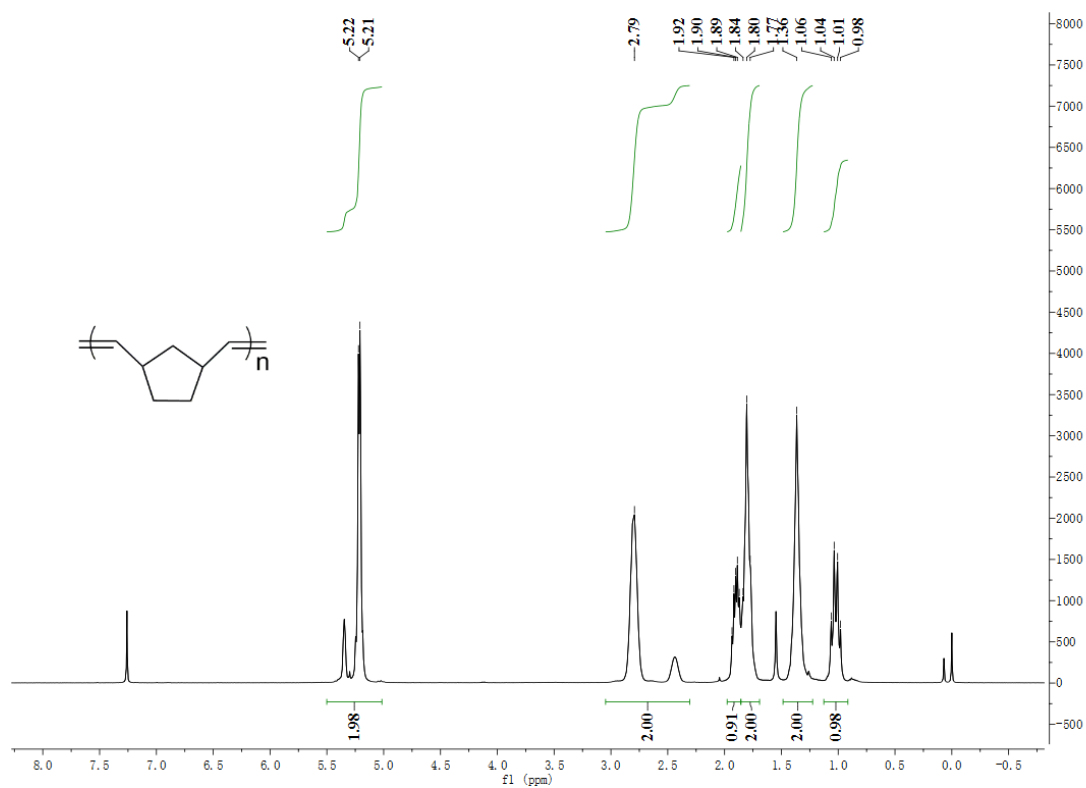

Figure S6.  $^1\text{H}$  NMR spectrum of **14** in  $\text{CDCl}_3$  (400 Hz)

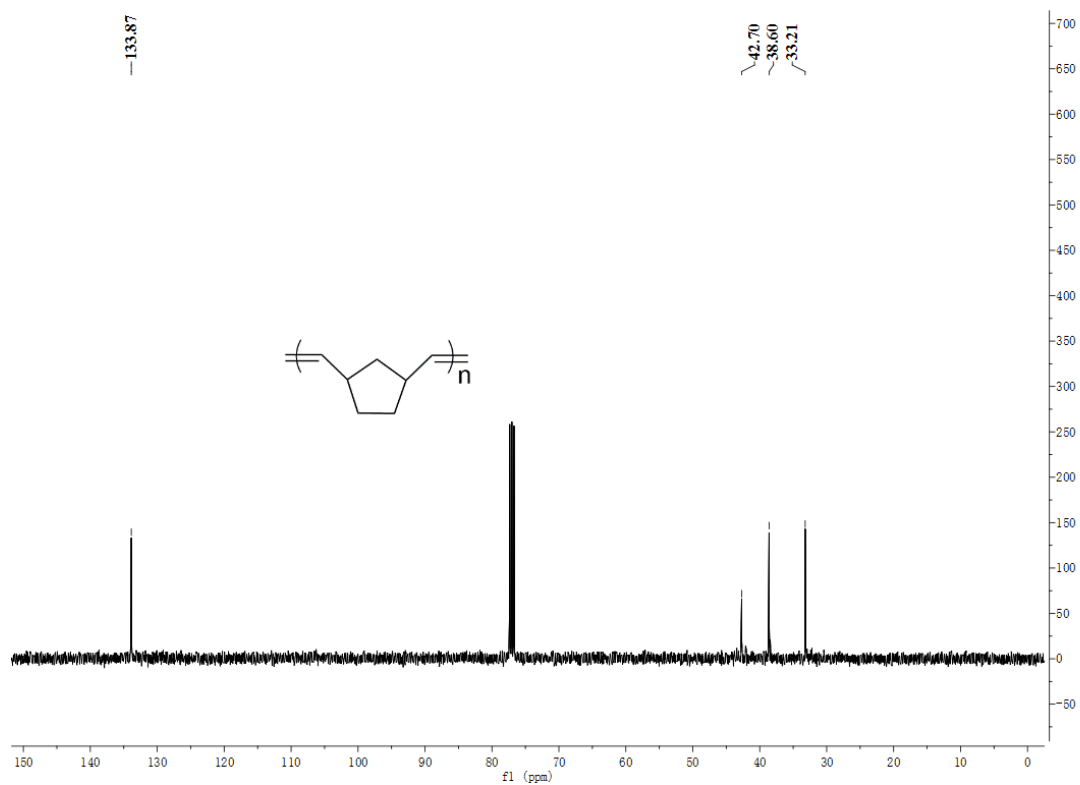

**Figure S7.**  $^{13}\text{C}\{^1\text{H}\}$  NMR spectrum of **14** in  $\text{CDCl}_3$  (100 Hz)

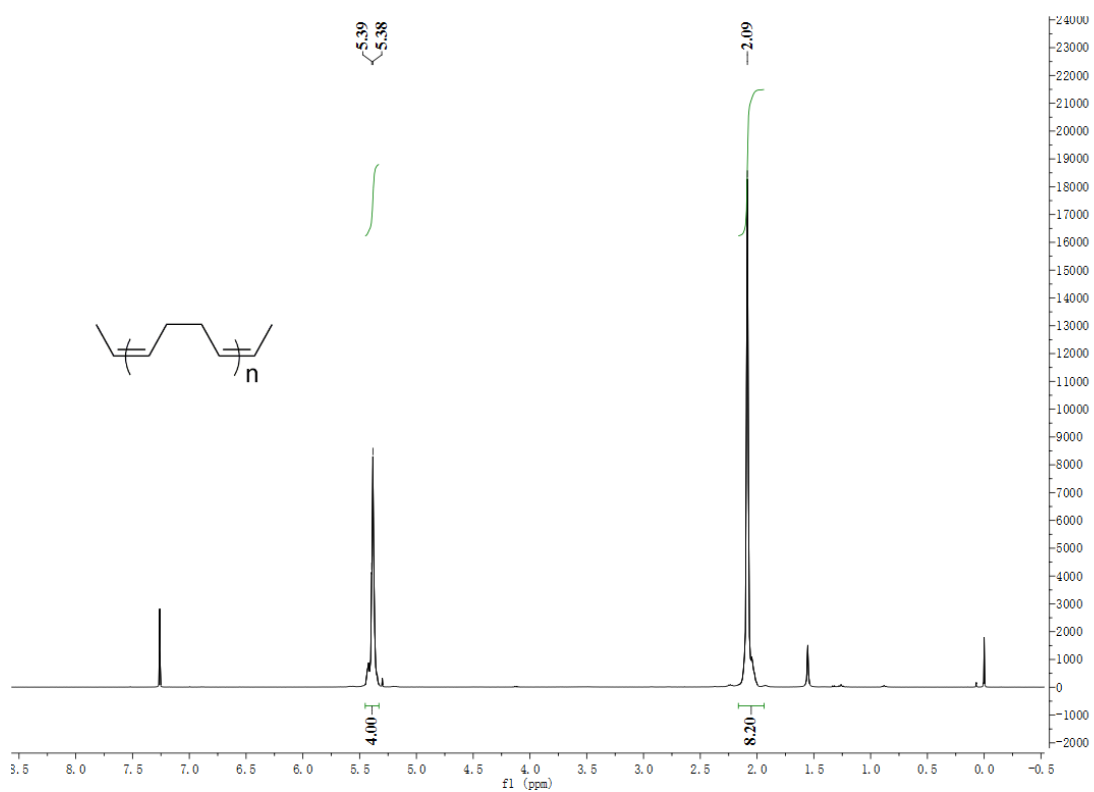

**Figure S8.**  $^1\text{H}$  NMR spectrum of **15** in  $\text{CDCl}_3$  (400 Hz)

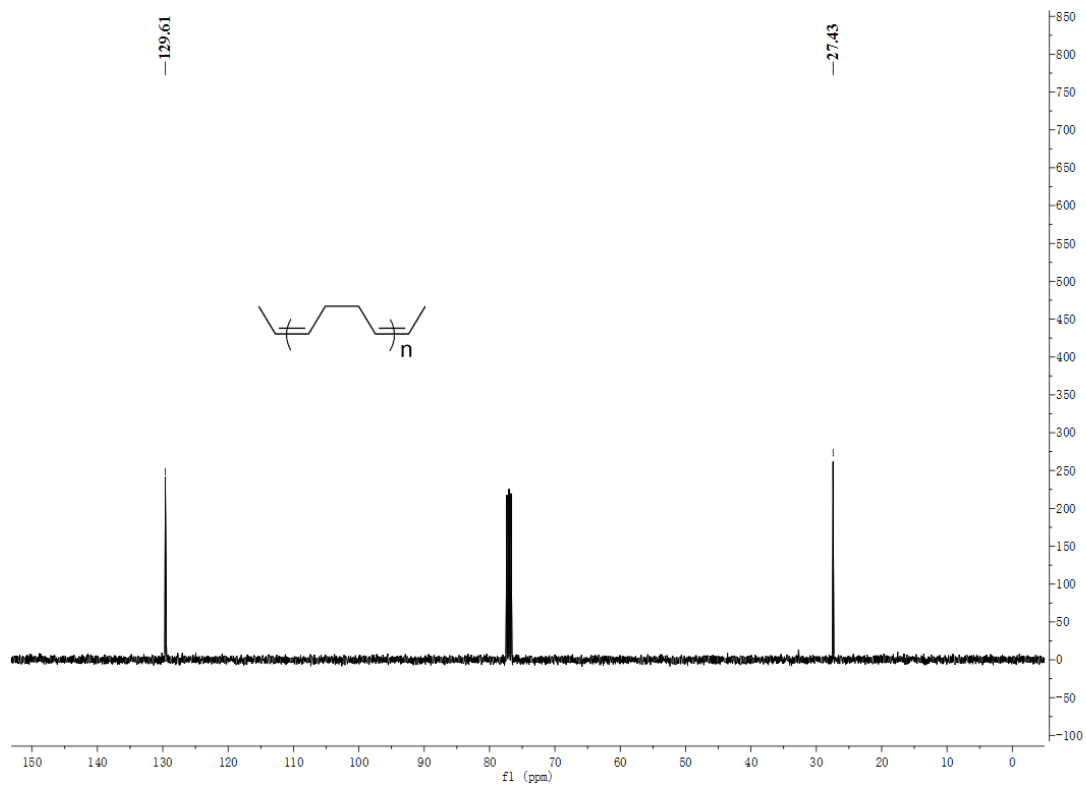

Figure S9.  $^{13}\text{C}\{^1\text{H}\}$  NMR spectrum of **15** in  $\text{CDCl}_3$  (100 Hz)

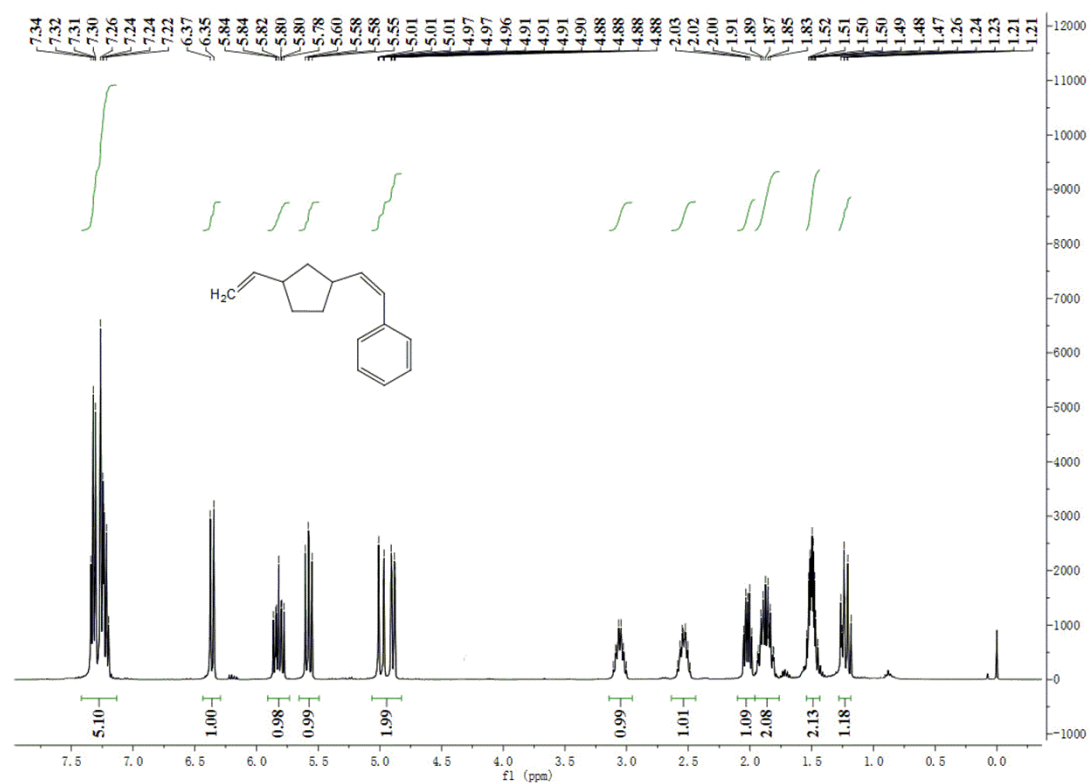

Figure S10.  $^1\text{H}$  NMR spectrum of **18a** in  $\text{CDCl}_3$  (400 Hz)

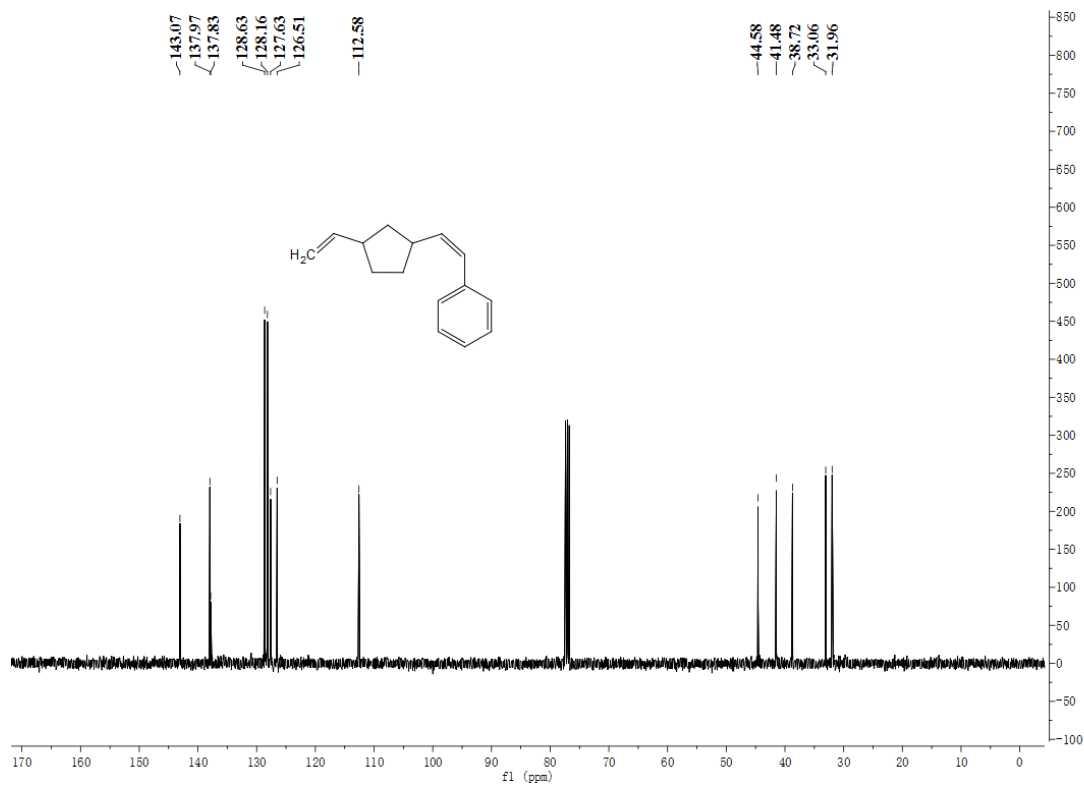

Figure S 11.  $^{13}\text{C}\{^1\text{H}\}$  NMR spectrum of **18a** in  $\text{CDCl}_3$  (100 Hz)

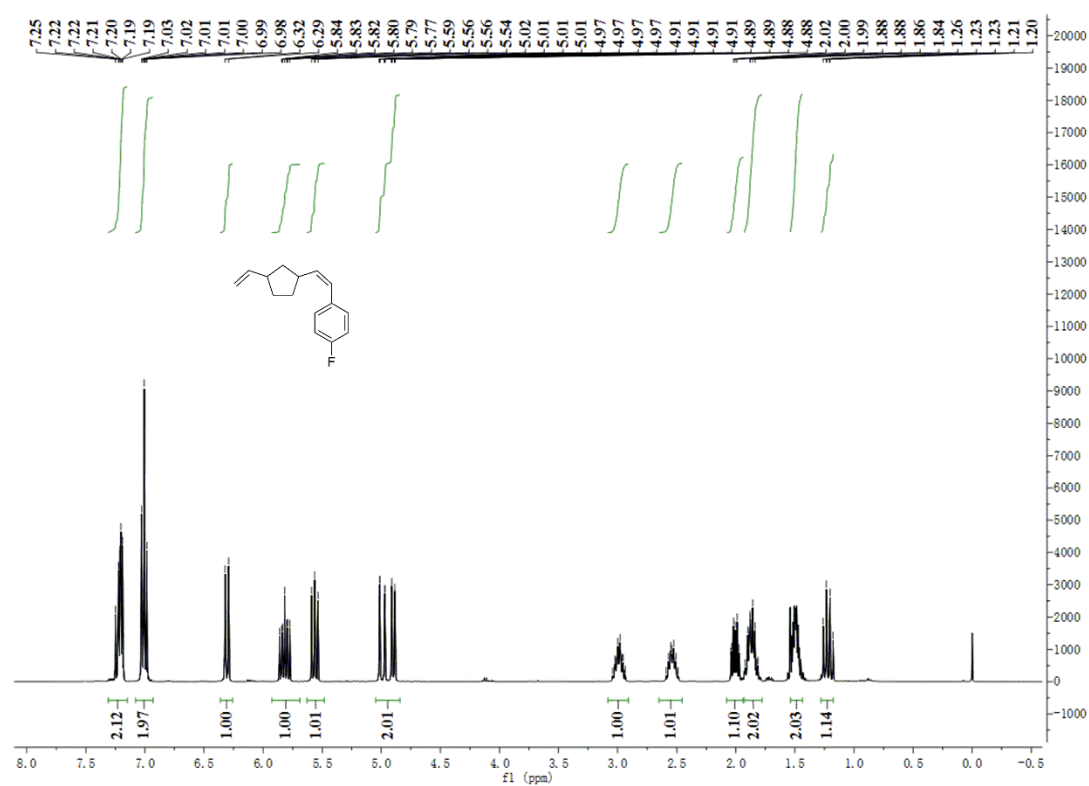

Figure S 12.  $^1\text{H}$  NMR spectrum of **18b** in  $\text{CDCl}_3$  (400 Hz)



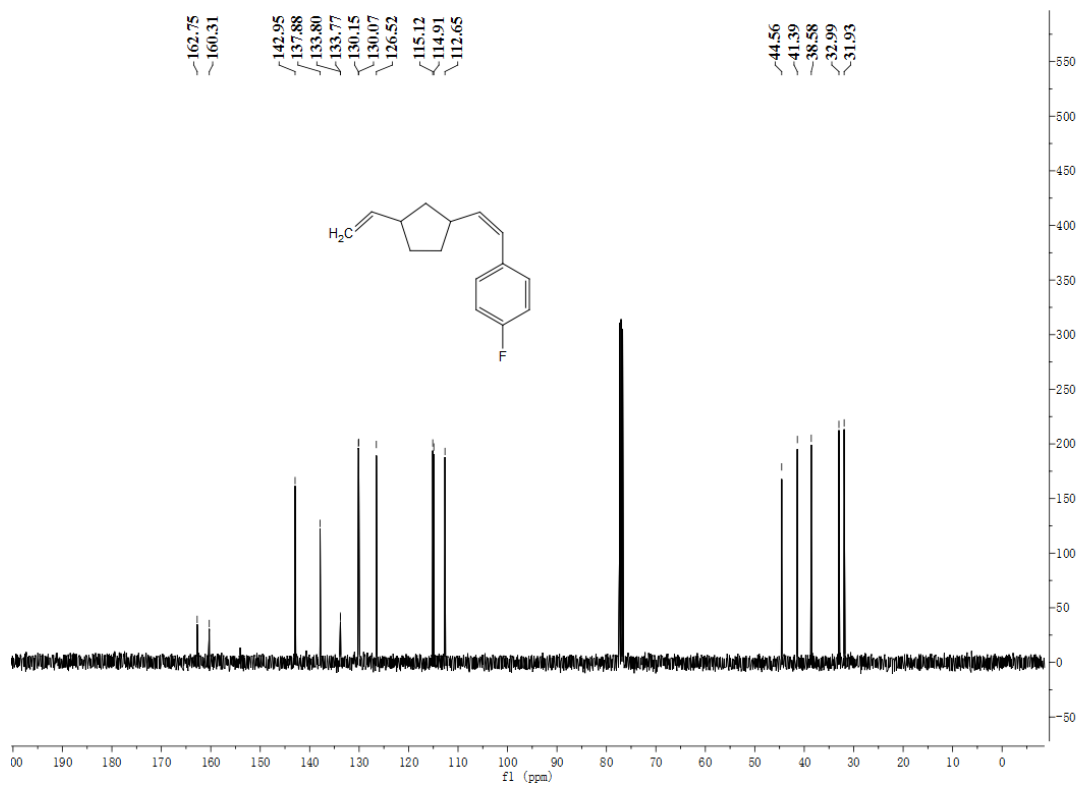

Figure S13.  $^{13}\text{C}\{^1\text{H}\}$  NMR spectrum of **18b** in  $\text{CDCl}_3$  (100 Hz)

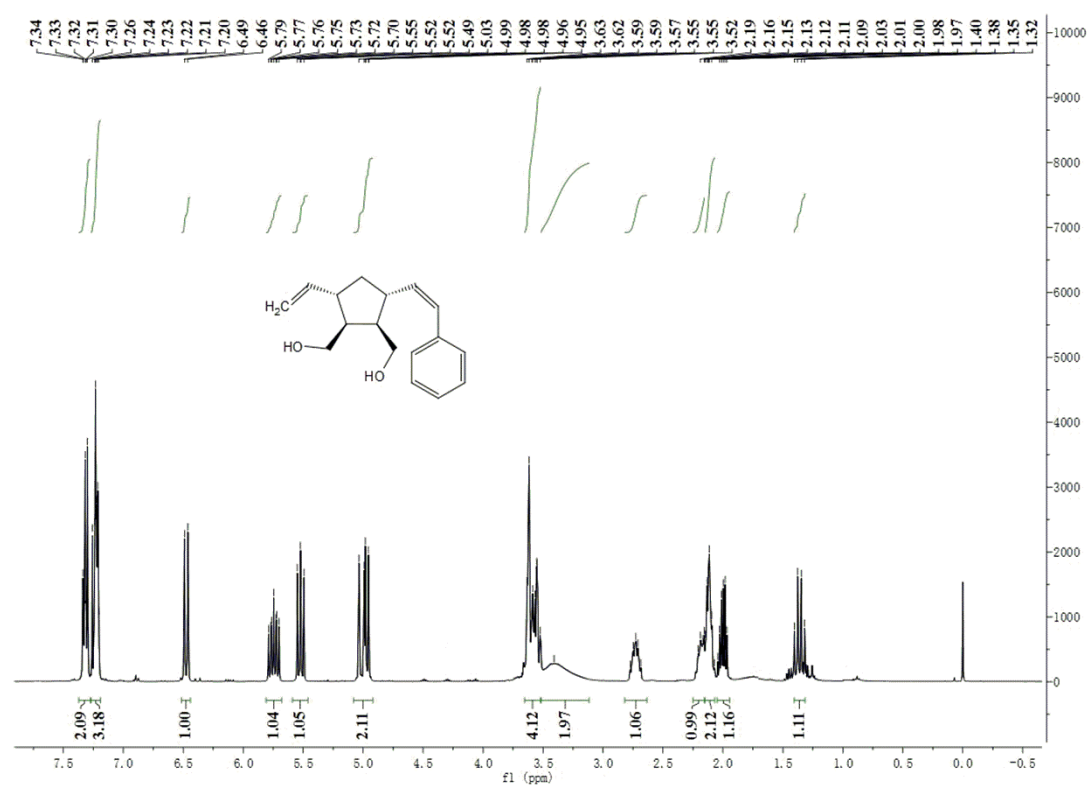

Figure S14.  $^1\text{H}$  NMR spectrum of **19a** in  $\text{CDCl}_3$  (400 Hz)

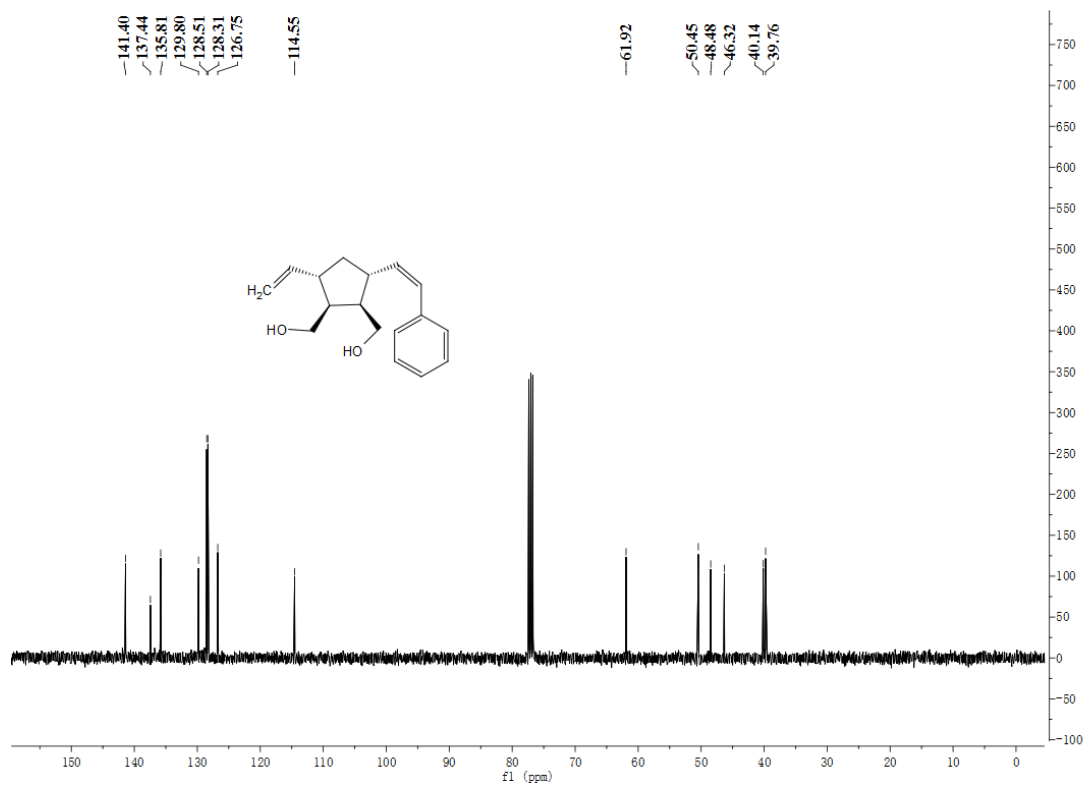

Figure S15.  $^{13}\text{C}\{^1\text{H}\}$  NMR spectrum of **19a** in  $\text{CDCl}_3$  (100 Hz)

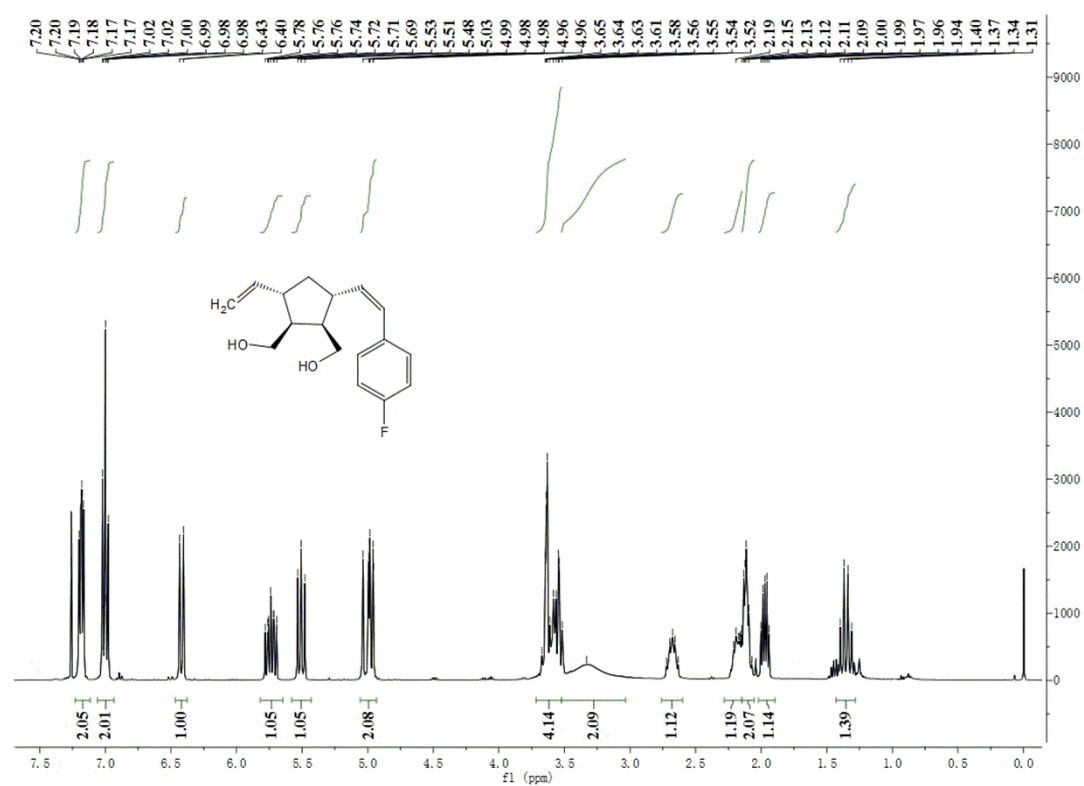

Figure S16.  $^1\text{H}$  NMR spectrum of **19b** in  $\text{CDCl}_3$  (400 Hz)

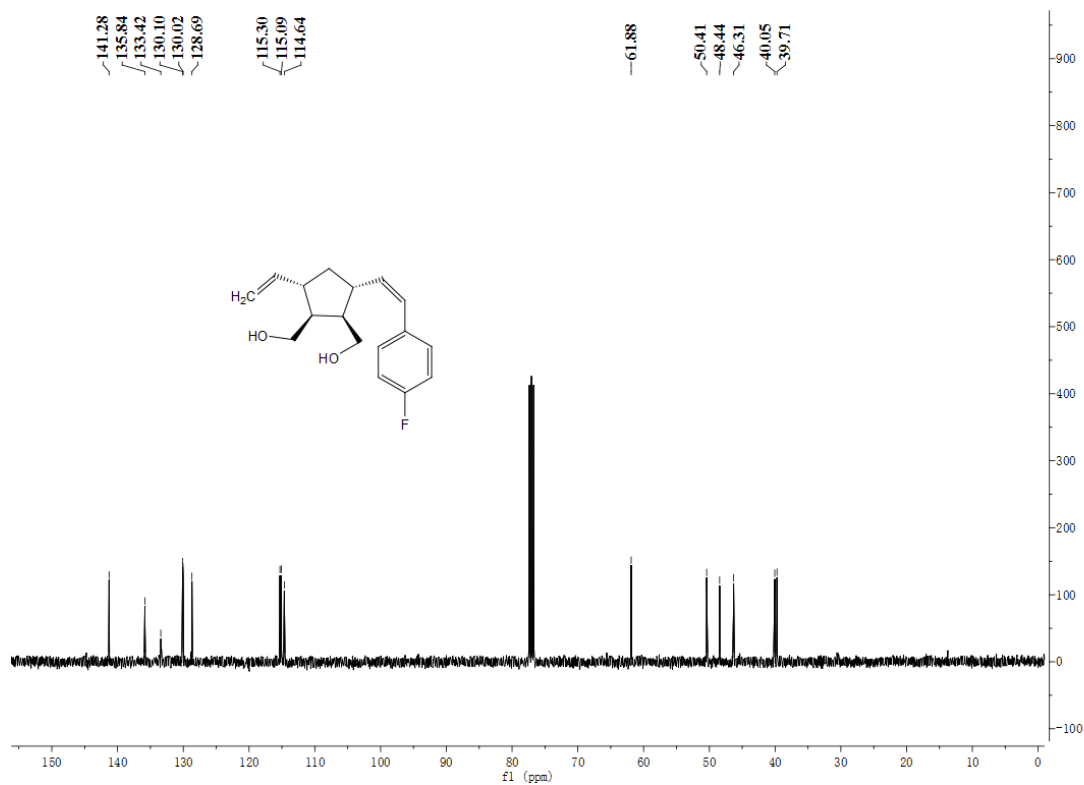

Figure S17.  $^{13}\text{C}\{^1\text{H}\}$  NMR spectrum of **19b** in  $\text{CDCl}_3$  (100 Hz)

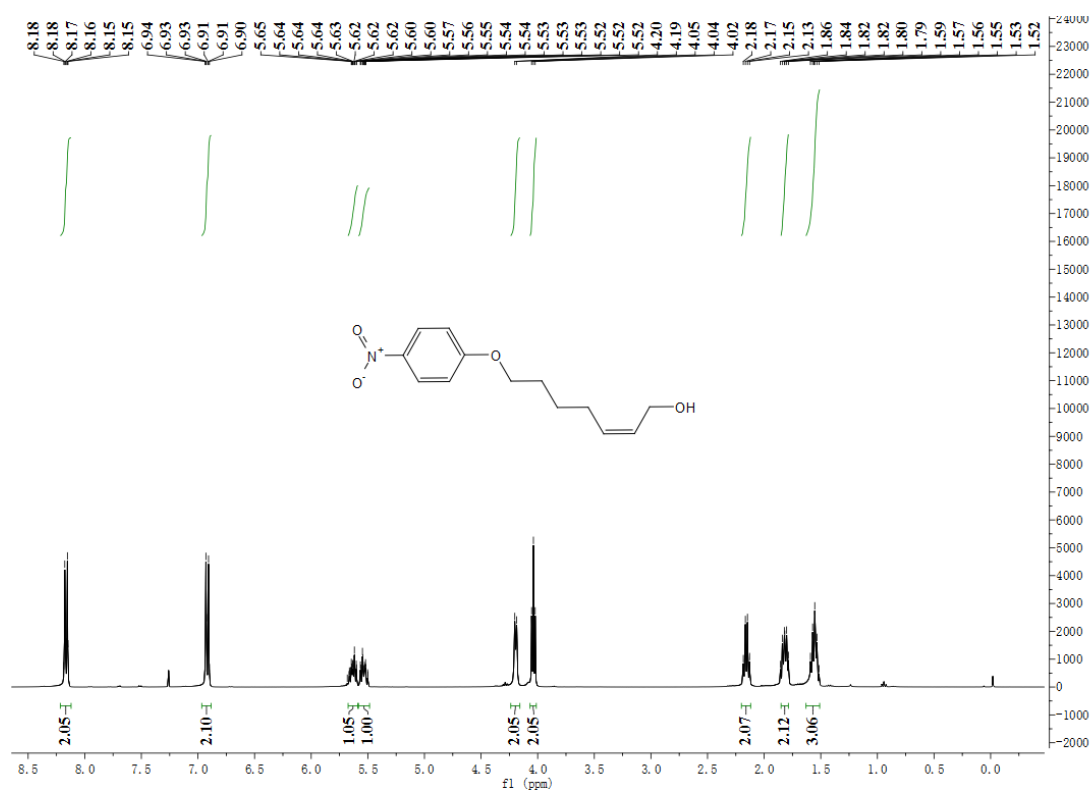

Figure S18.  $^1\text{H}$  NMR spectrum of **21** in  $\text{CDCl}_3$  (400 Hz)

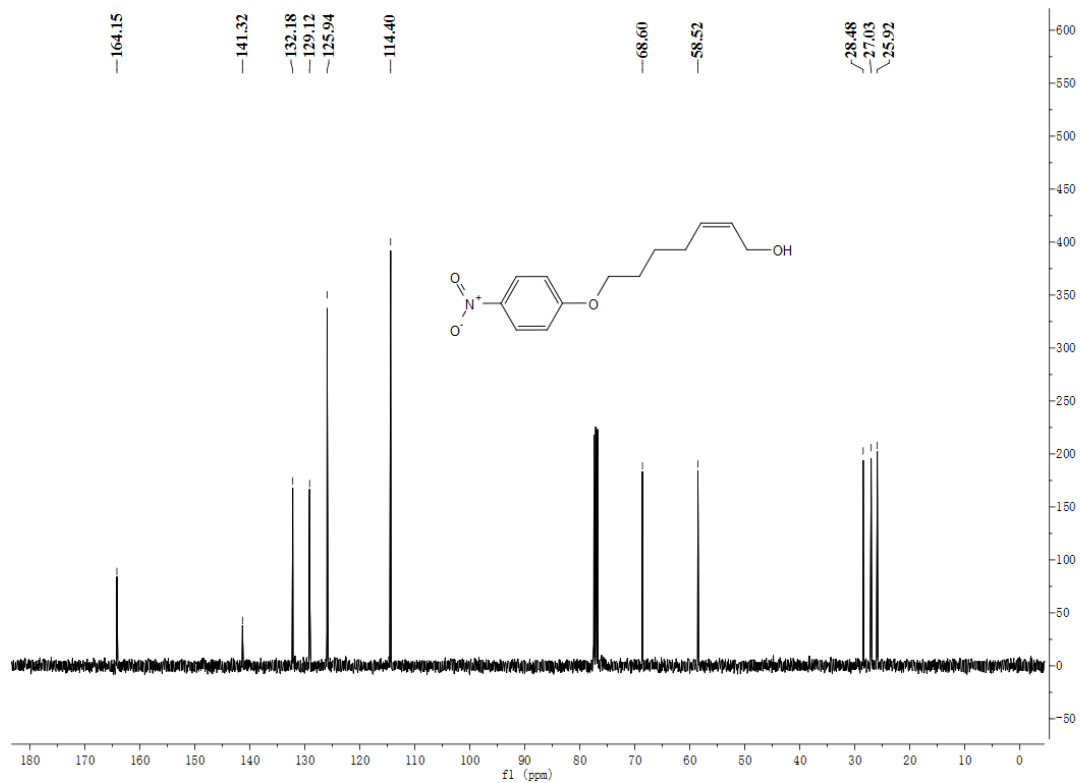

**Figure S19.**  $^{13}\text{C}\{^1\text{H}\}$  NMR spectrum of **21** in  $\text{CDCl}_3$  (100 Hz)

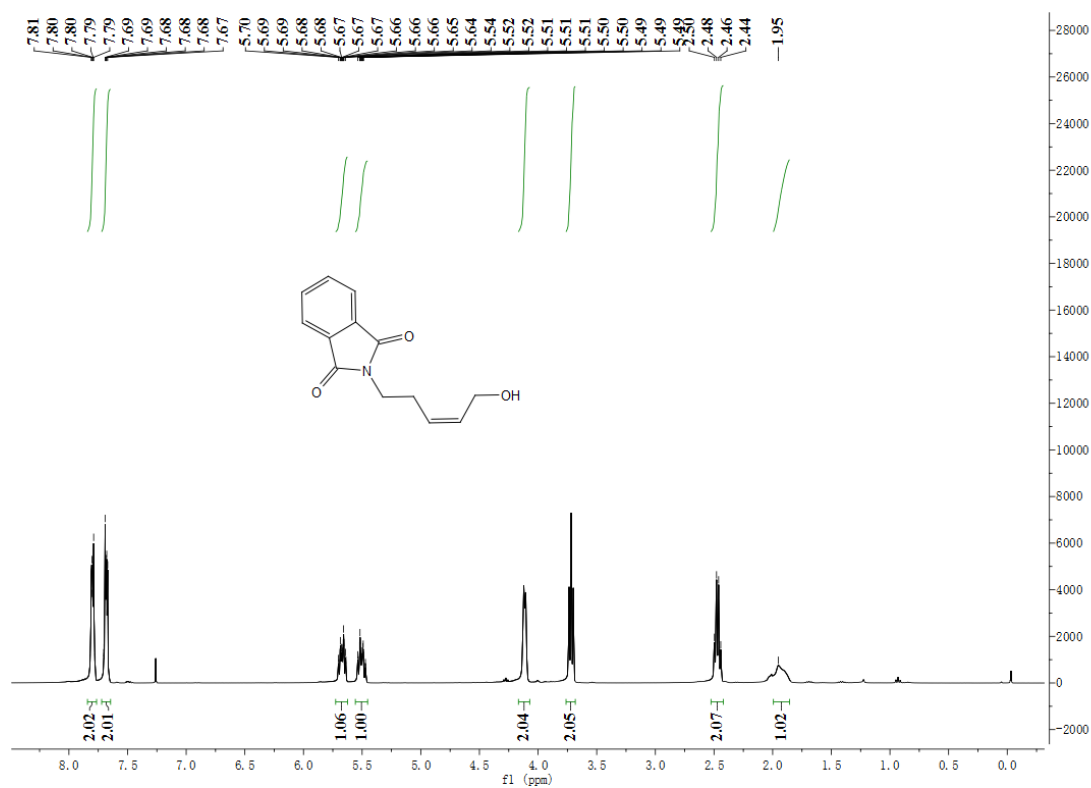

**Figure S20.**  $^1\text{H}$  NMR spectrum of **24** in  $\text{CDCl}_3$  (400 Hz)

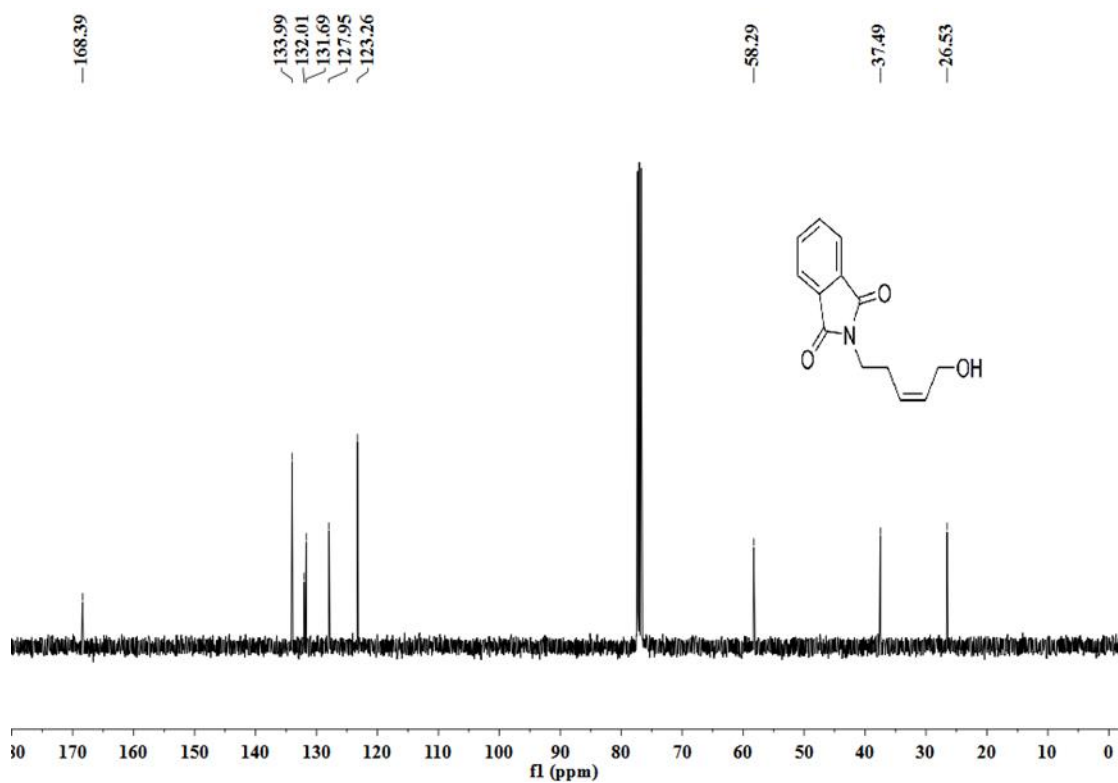

Figure S21.  $^{13}\text{C}\{^1\text{H}\}$  NMR spectrum of 24 in  $\text{CDCl}_3$  (100 Hz)

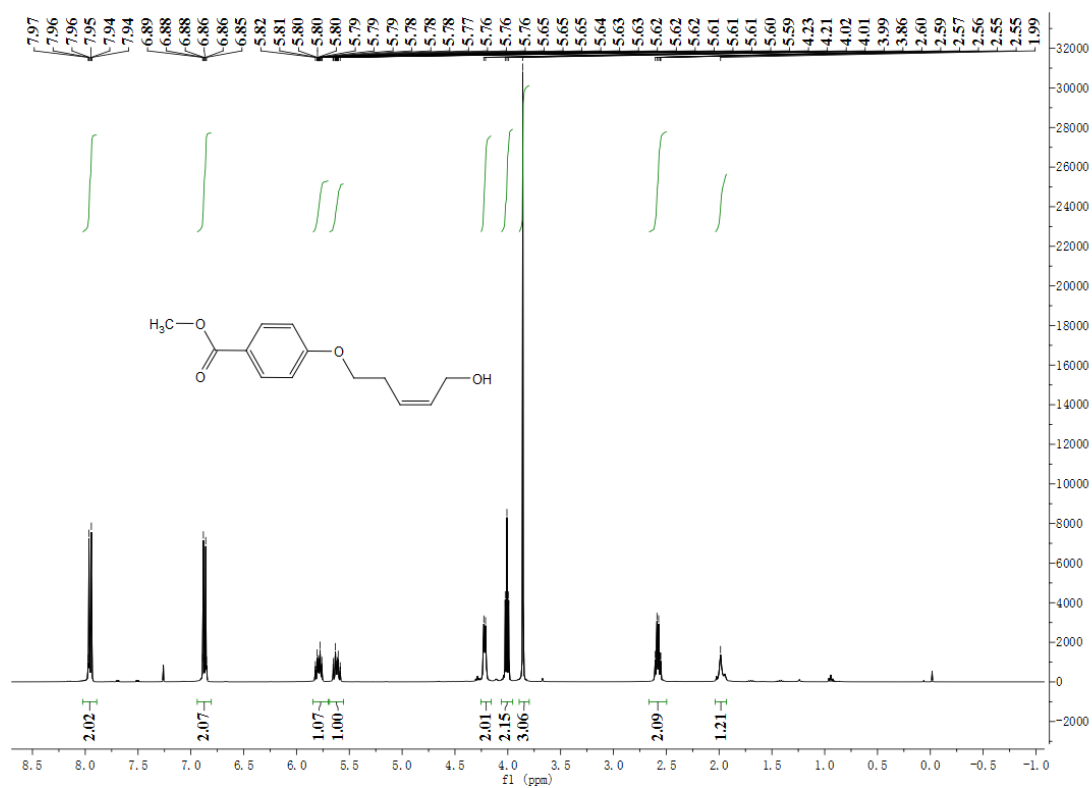

Figure S22.  $^1\text{H}$  NMR spectrum of 26 in  $\text{CDCl}_3$  (400 Hz)

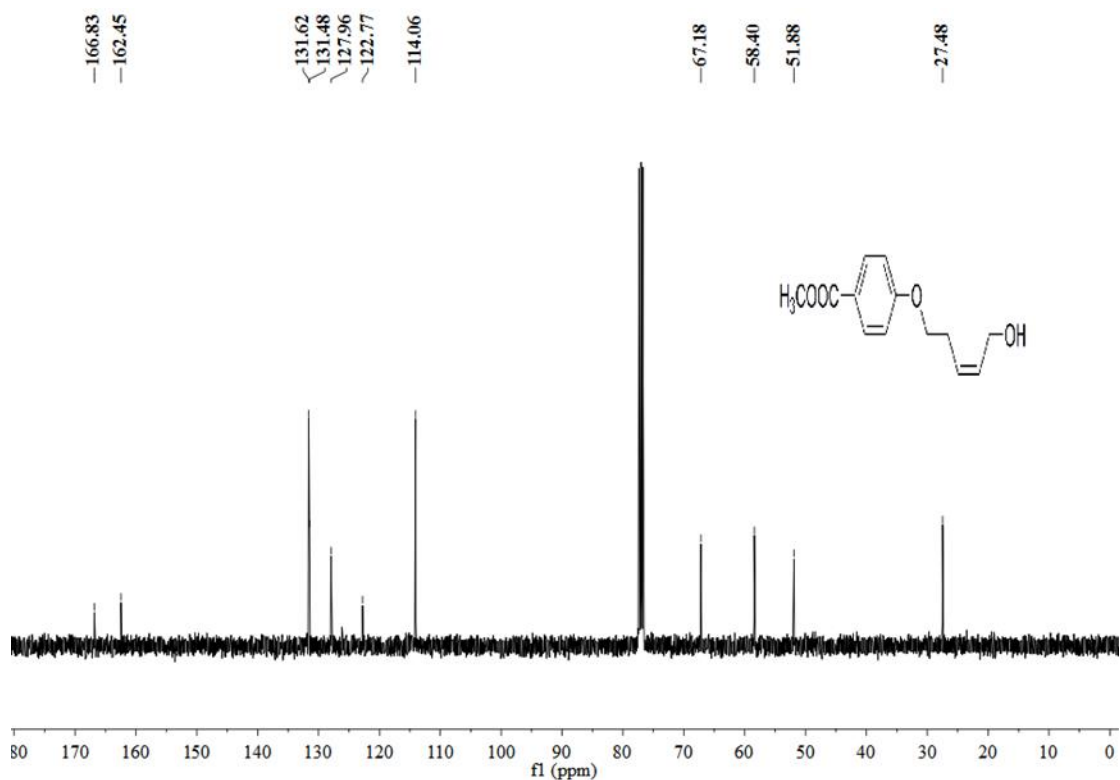

Figure S23.  $^{13}\text{C}\{^1\text{H}\}$  NMR spectrum of **26** in  $\text{CDCl}_3$  (100 Hz)

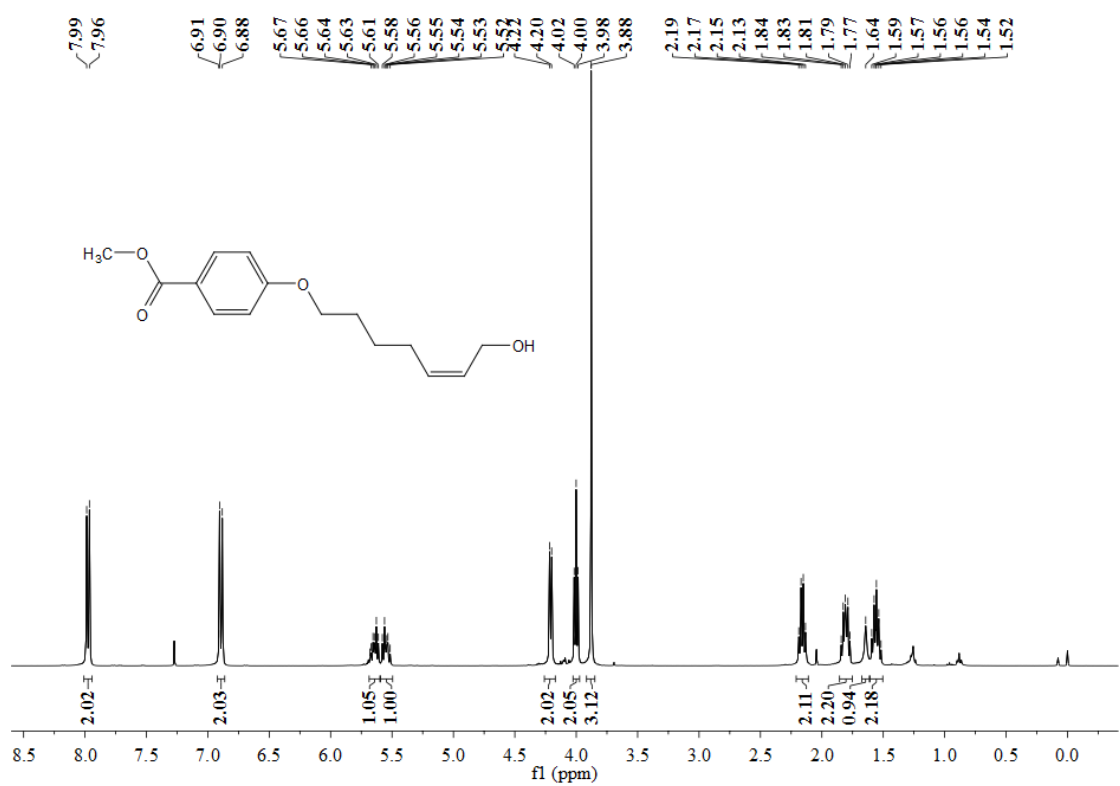

Figure S24.  $^1\text{H}$  NMR spectrum of **27** in  $\text{CDCl}_3$  (400 Hz)

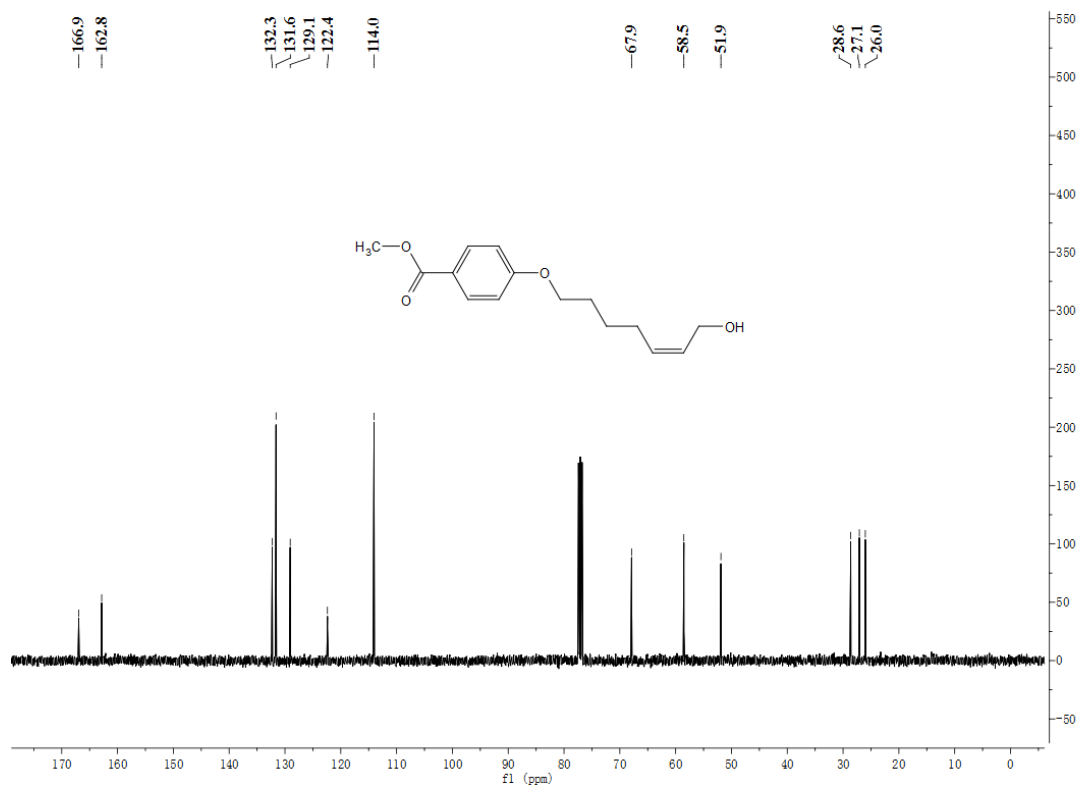

Figure S25.  $^{13}\text{C}\{^1\text{H}\}$  NMR spectrum of 27 in  $\text{CDCl}_3$  (100 Hz)

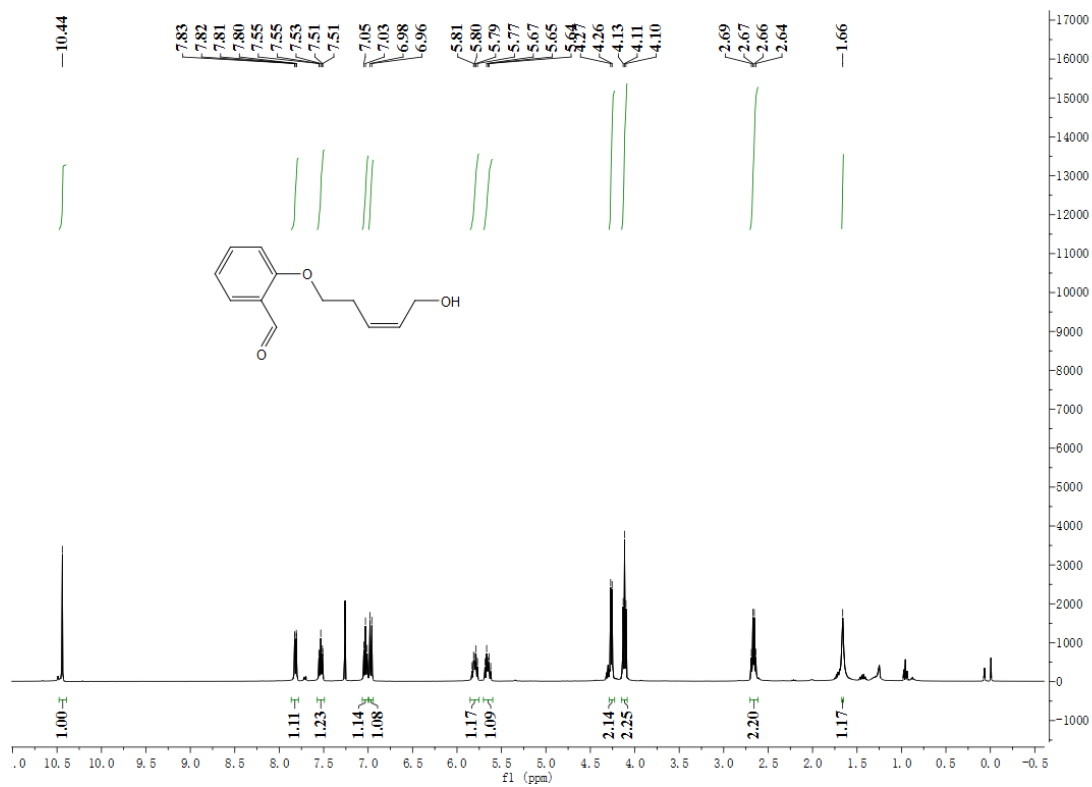

Figure S26.  $^1\text{H}$  NMR spectrum of 29 in  $\text{CDCl}_3$  (400 Hz)

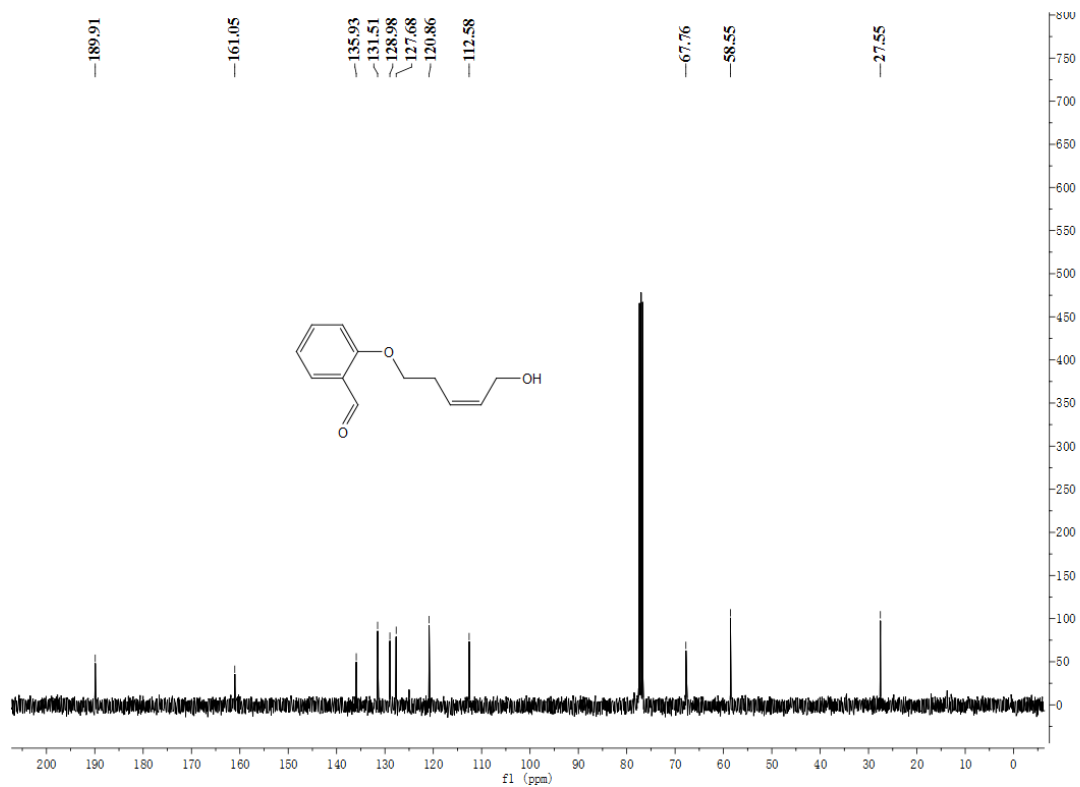

Figure S27.  $^{13}\text{C}\{^1\text{H}\}$  NMR spectrum of **29** in  $\text{CDCl}_3$  (100 Hz)

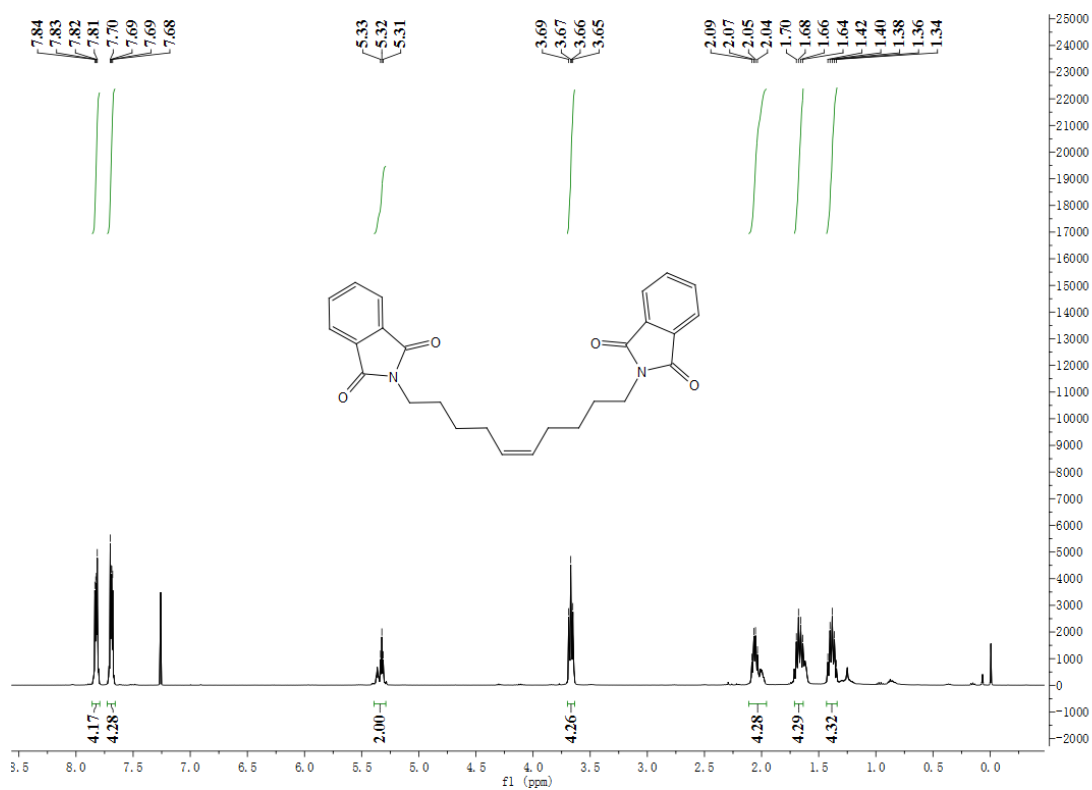

Figure S28.  $^1\text{H}$  NMR spectrum of **33** in  $\text{CDCl}_3$  (400 Hz)



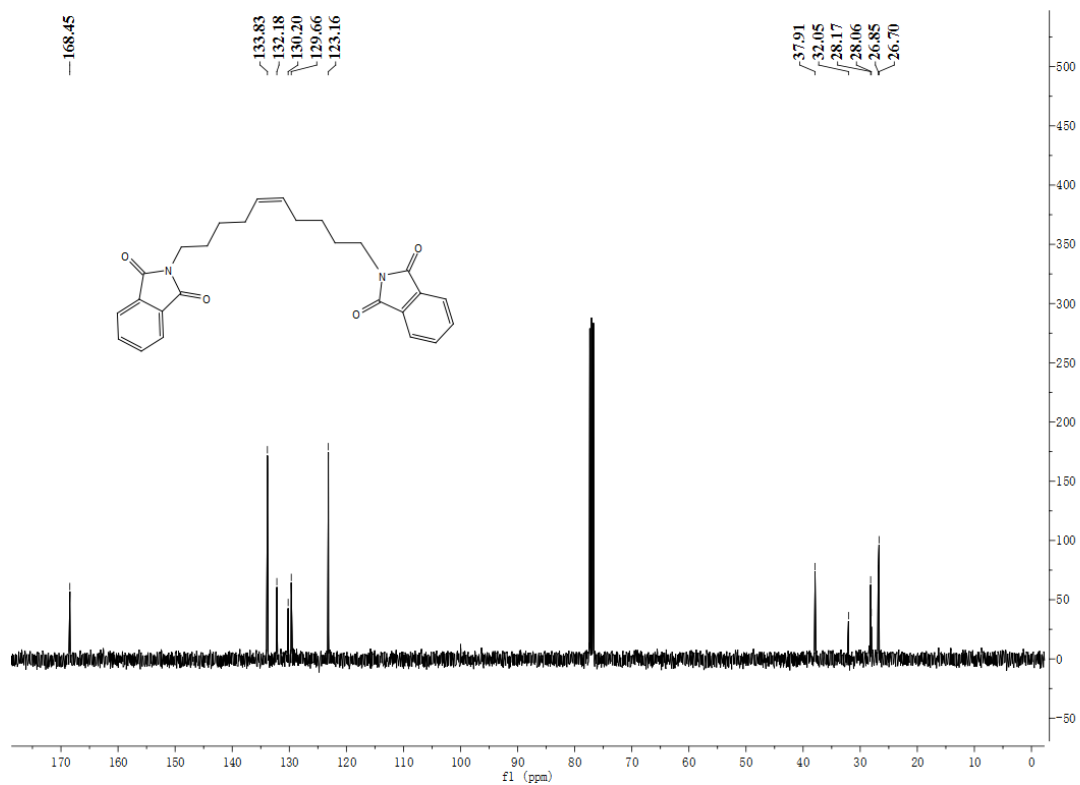

Figure S29.  $^{13}\text{C}\{^1\text{H}\}$  NMR spectrum of 33 in  $\text{CDCl}_3$  (100 Hz)

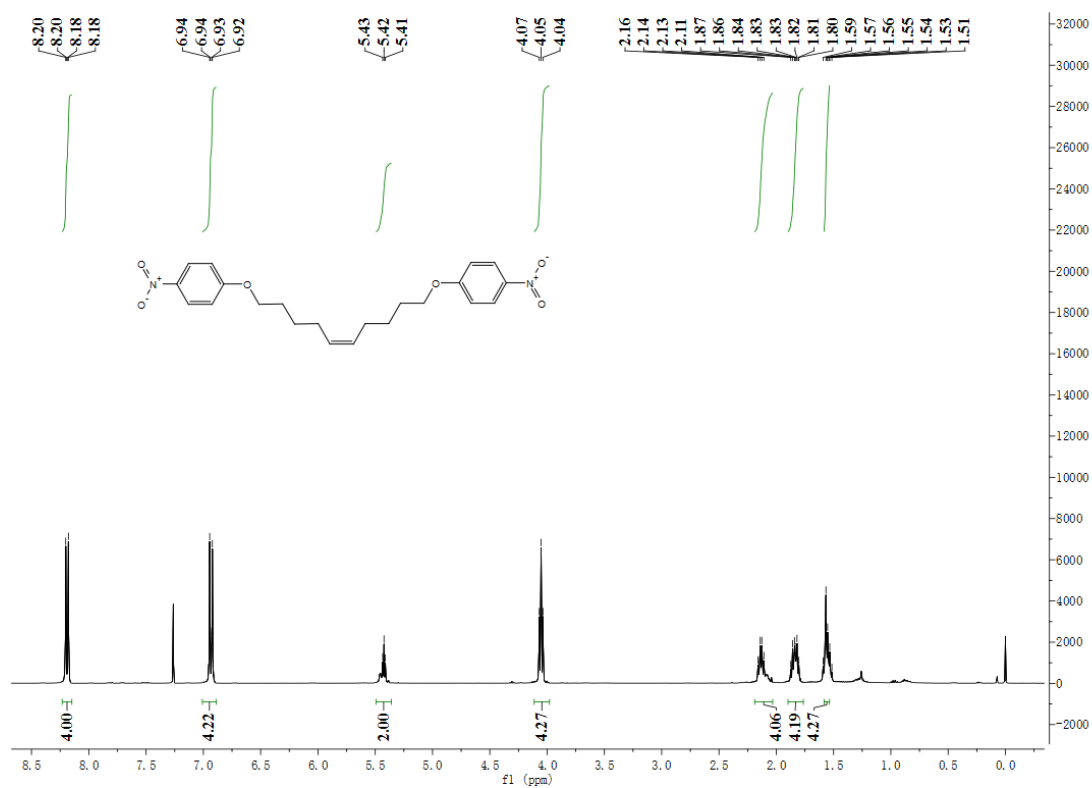

Figure S30.  $^1\text{H}$  NMR spectrum of 34 in  $\text{CDCl}_3$  (400 Hz)

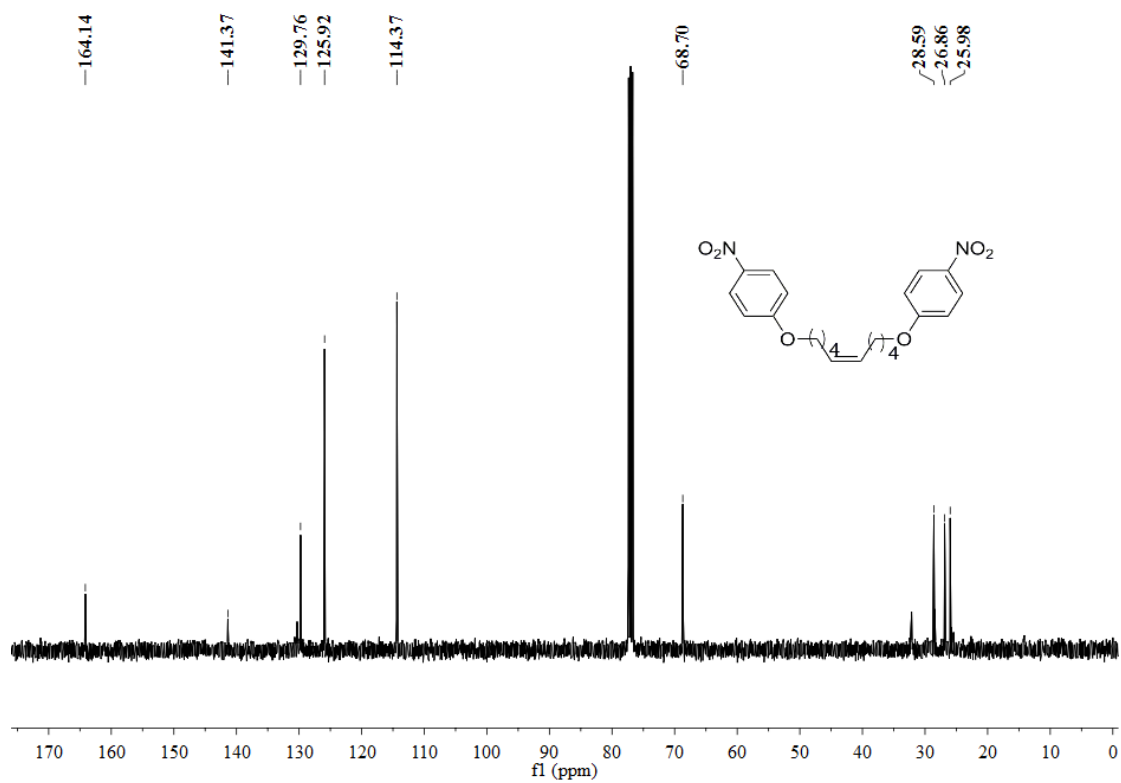

Figure S31.  $^{13}\text{C}\{^1\text{H}\}$  NMR spectrum of **34** in  $\text{CDCl}_3$  (100 Hz)

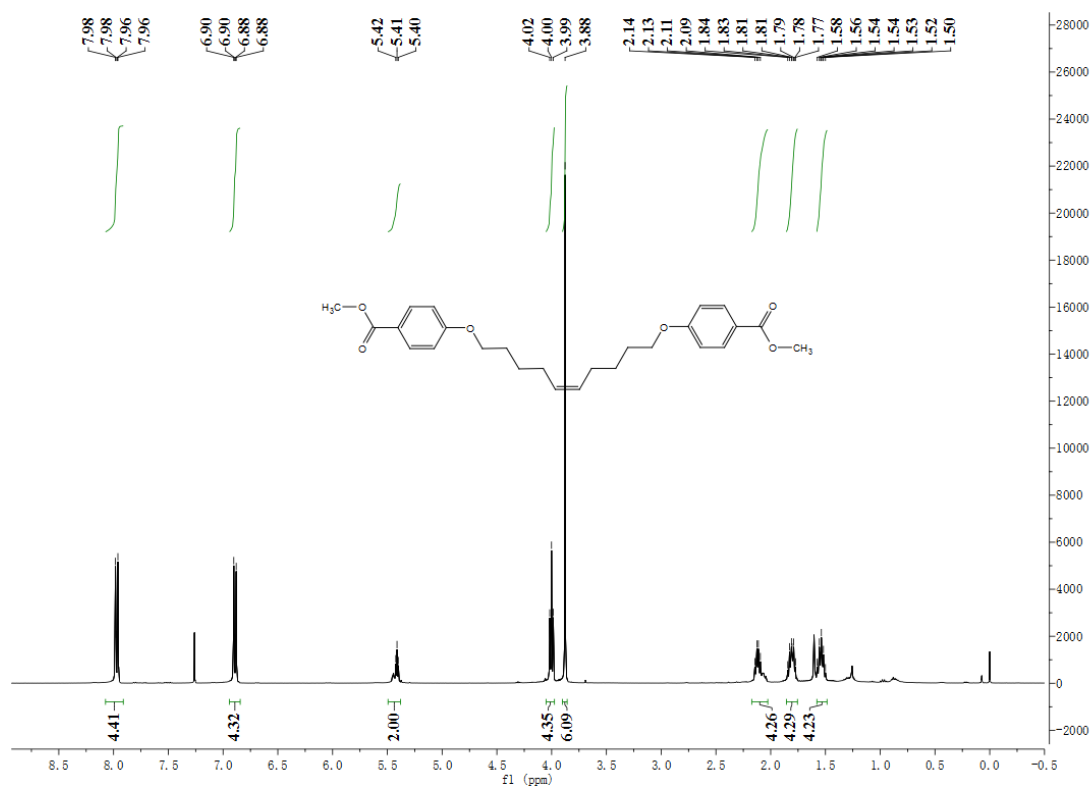

Figure S32.  $^1\text{H}$  NMR spectrum of **35** in  $\text{CDCl}_3$  (400 Hz)

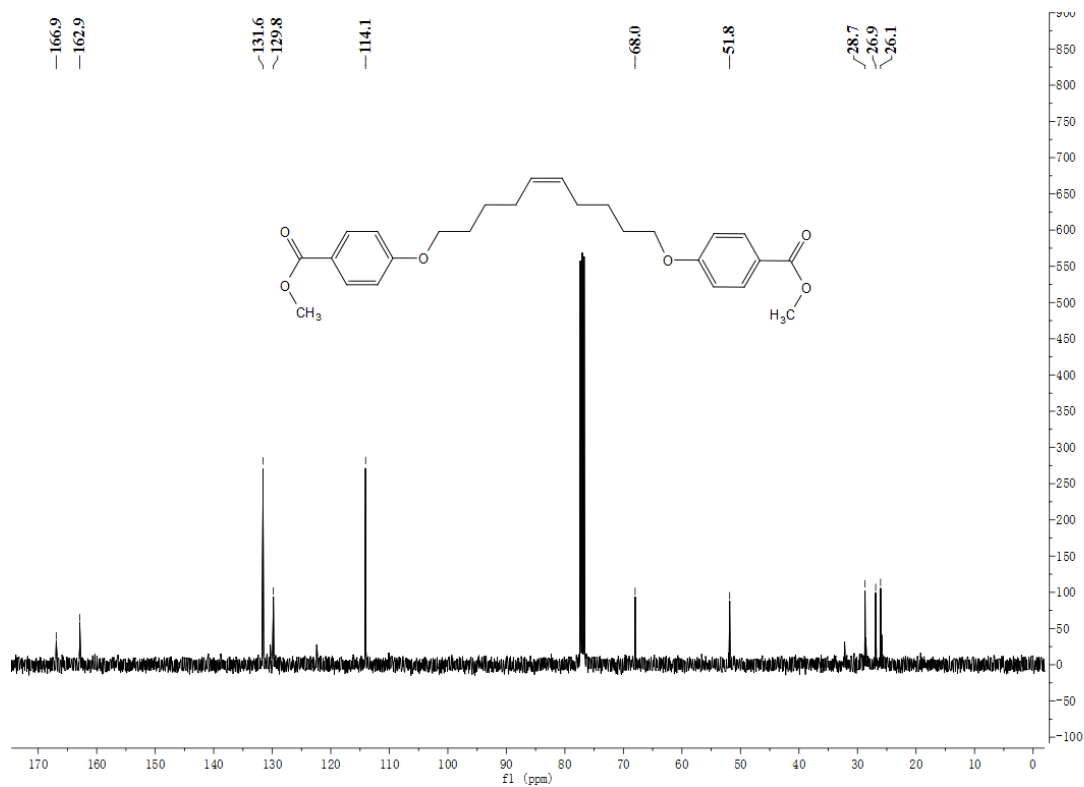

Figure S33.  $^{13}\text{C}\{^1\text{H}\}$  NMR spectrum of **35** in  $\text{CDCl}_3$  (100 Hz)

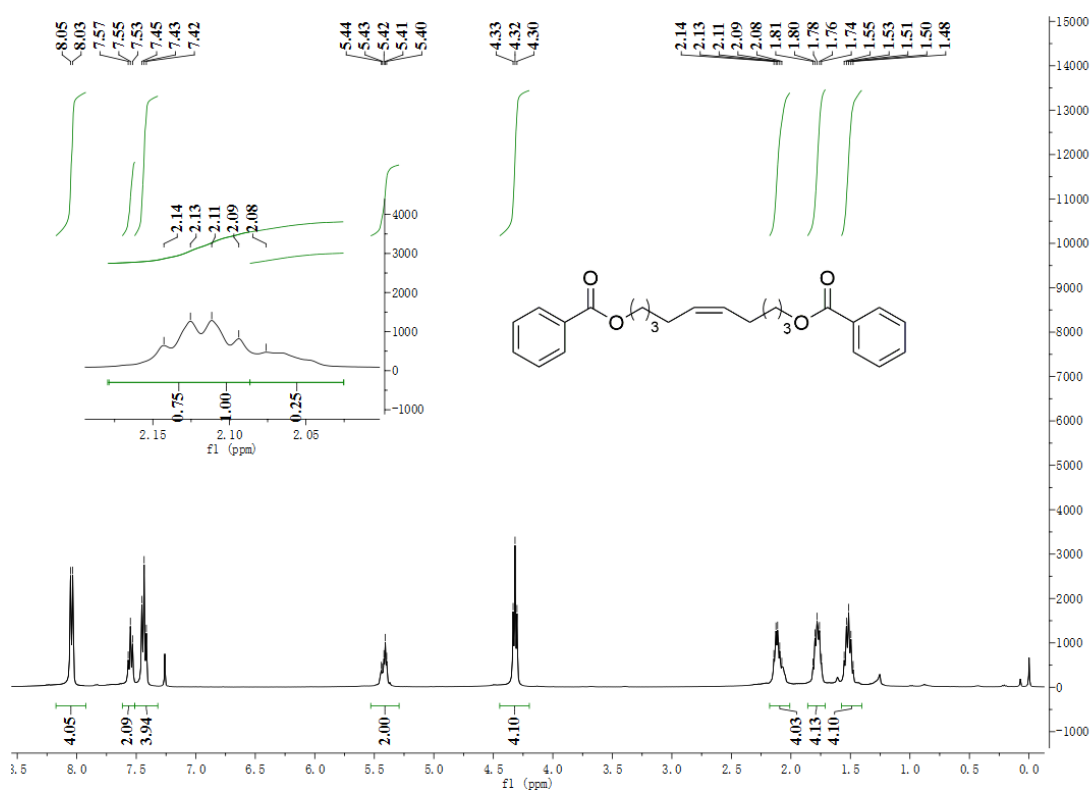

Figure S34.  $^1\text{H}$  NMR spectrum of **36** in  $\text{CDCl}_3$  (400 Hz)

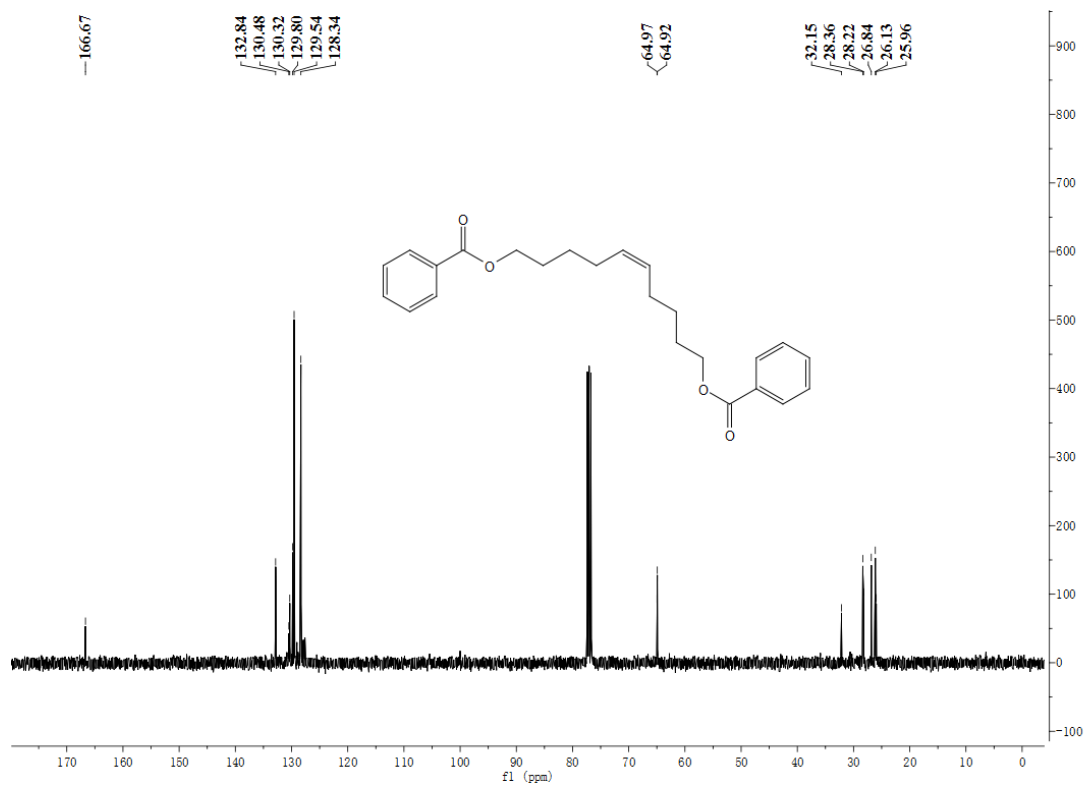

Figure S35.  $^{13}\text{C}\{^1\text{H}\}$  NMR spectrum of **36** in  $\text{CDCl}_3$  (100 Hz)

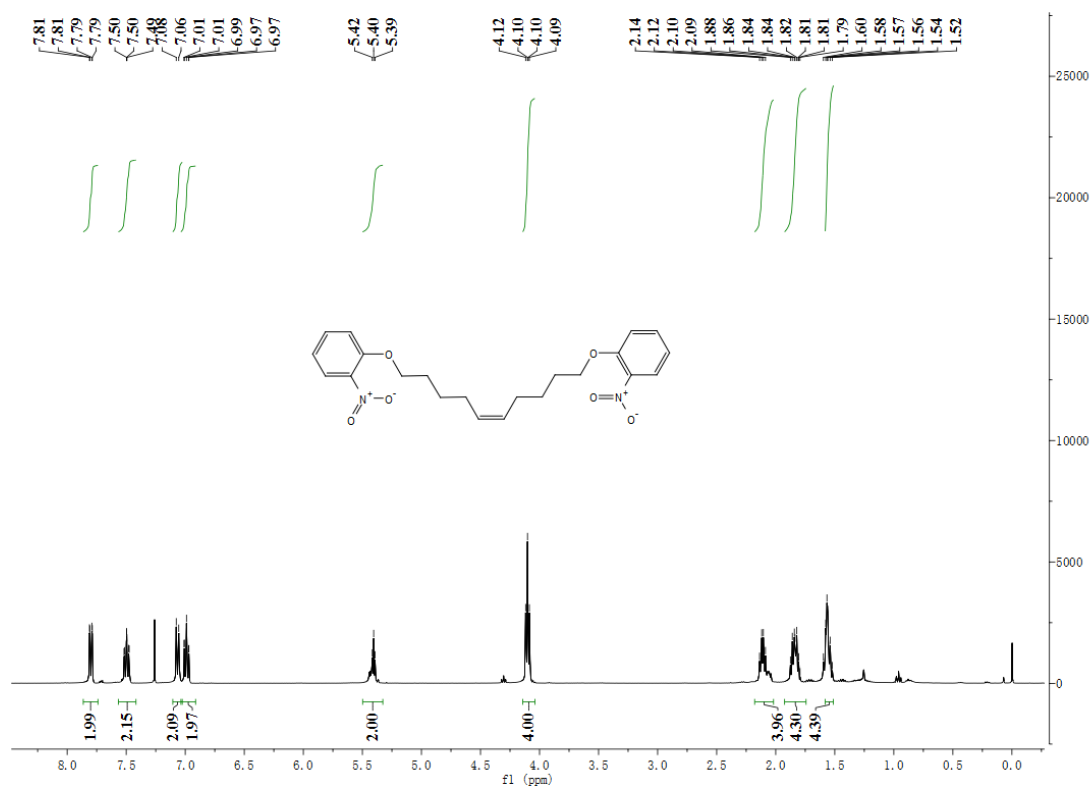

Figure S36.  $^1\text{H}$  NMR spectrum of **37** in  $\text{CDCl}_3$  (400 Hz)

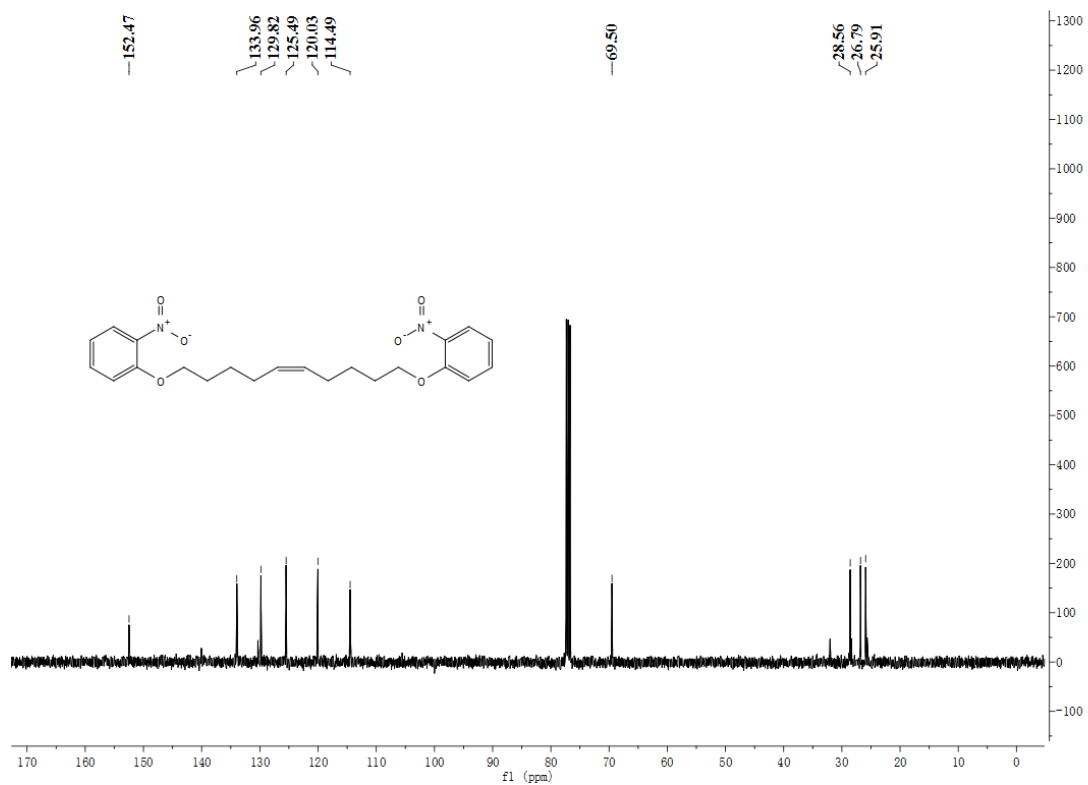

Figure S37.  $^{13}\text{C}\{^1\text{H}\}$  NMR spectrum of **37** in  $\text{CDCl}_3$  (100 Hz)

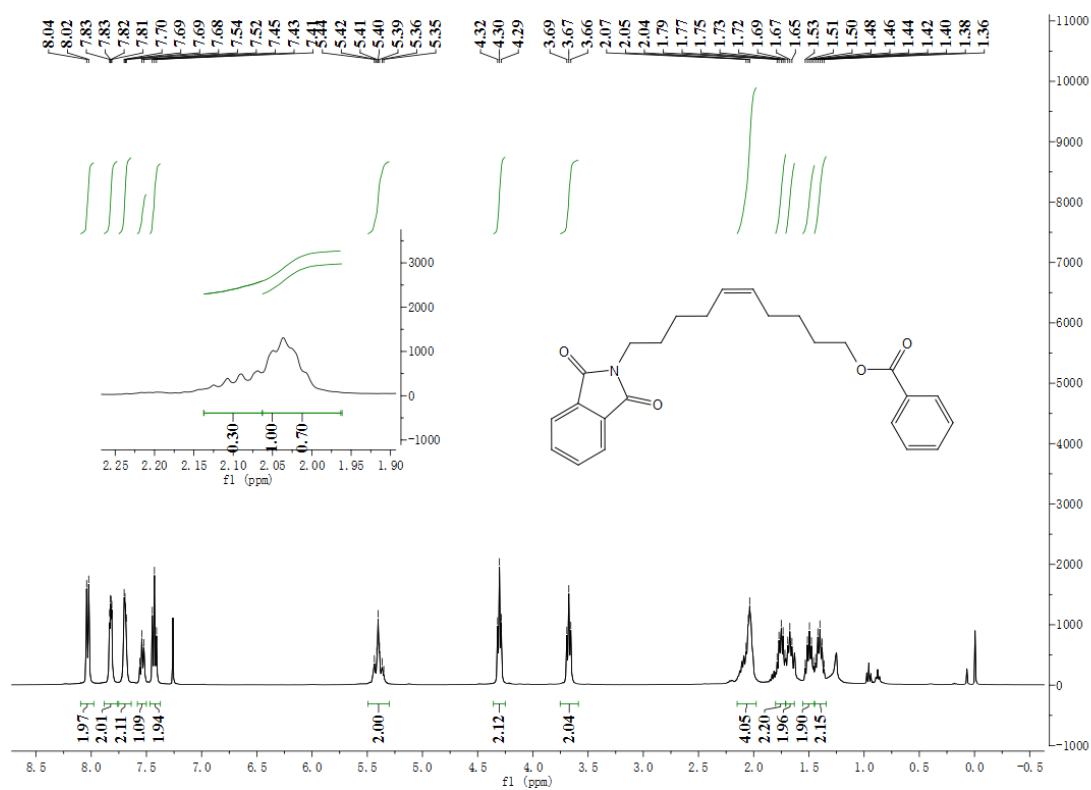

Figure S38.  $^1\text{H}$  NMR spectrum of **38** in  $\text{CDCl}_3$  (400 Hz)

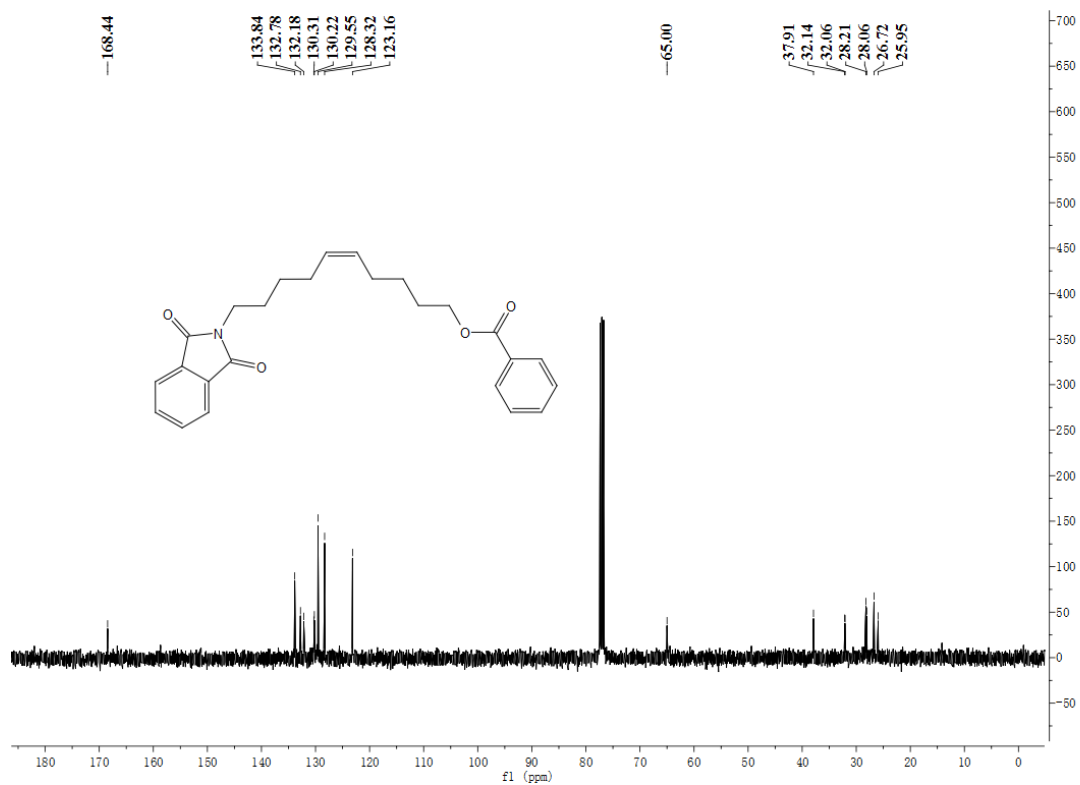

Figure S39.  $^{13}\text{C}\{^1\text{H}\}$  NMR spectrum of **38** in  $\text{CDCl}_3$  (100 Hz)

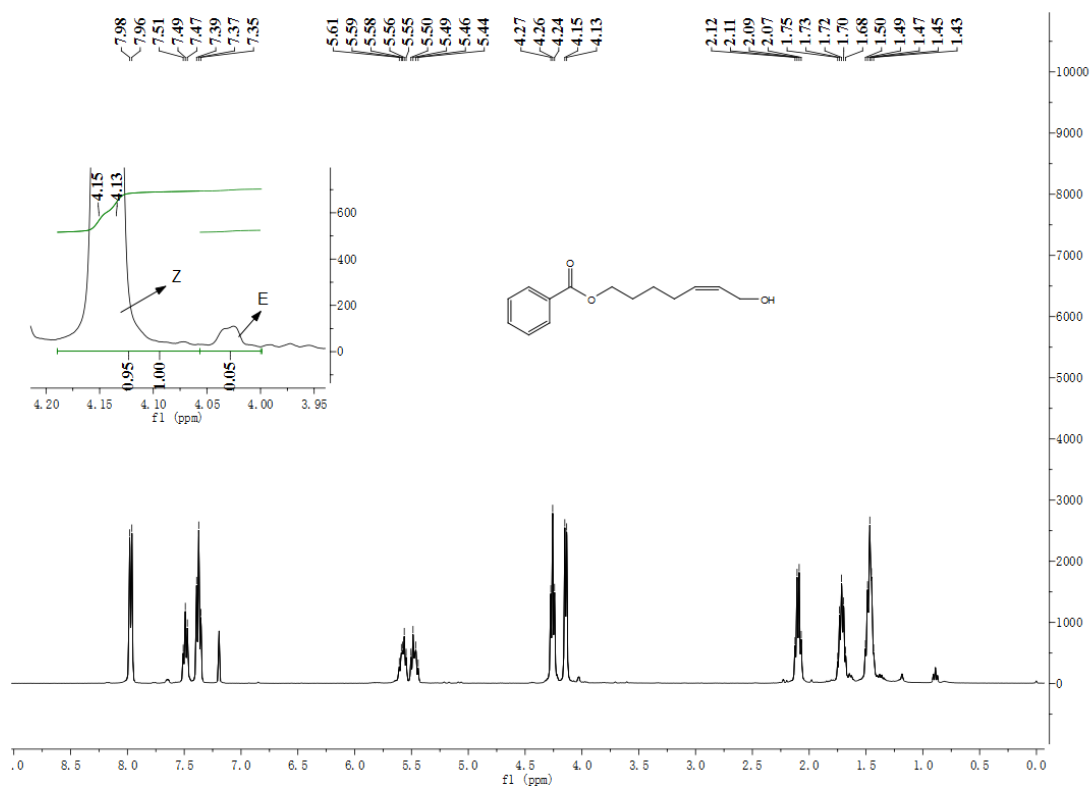

Figure S40.  $^1\text{H}$  NMR spectrum of **23** in  $\text{CDCl}_3$  (400 Hz) (18<sup>th</sup> Days)

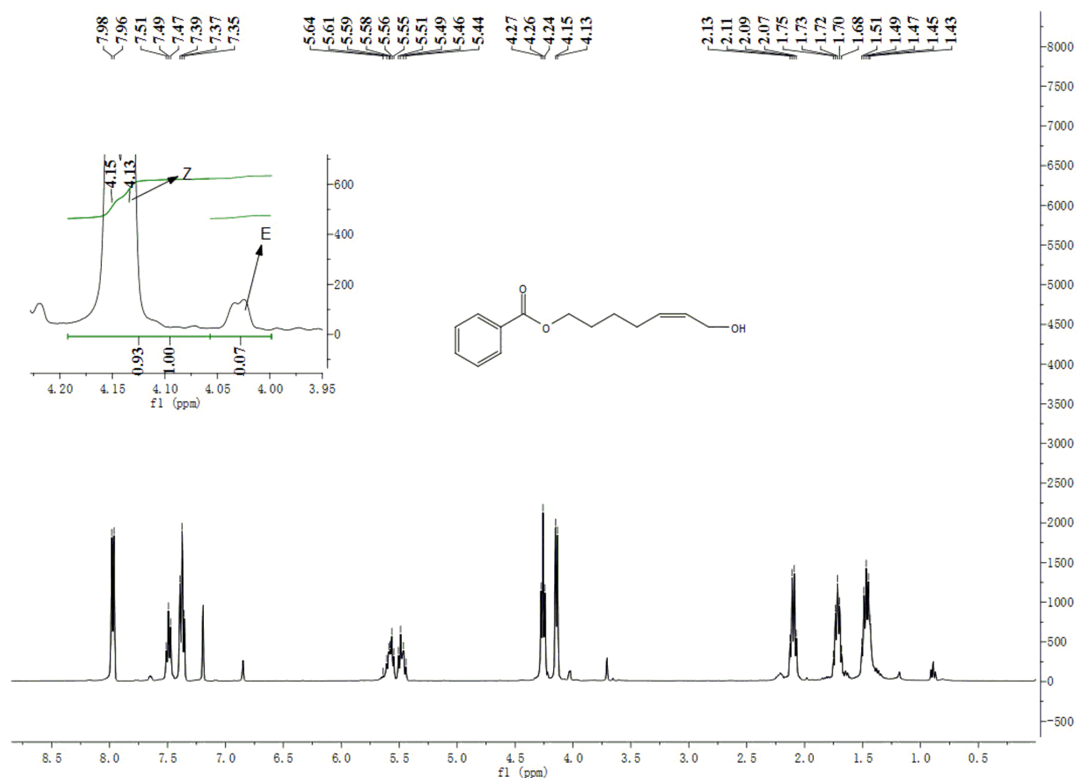

**Figure S41.**  $^1\text{H}$  NMR spectrum of **23** in  $\text{CDCl}_3$  (400 Hz) (28<sup>th</sup> Days)

**Table S1.** Crystal data and structure refinement for Ru-based complex

|                                    |                                                              |
|------------------------------------|--------------------------------------------------------------|
| Identification Code                | <b>B4</b>                                                    |
| Empirical formula                  | $\text{C}_{35}\text{H}_{39}\text{N}_2\text{O}_3\text{RuS}_2$ |
| Formula weight                     | 700.87                                                       |
| Temperature/K                      | 135.00(10)                                                   |
| Crystal system                     | monoclinic                                                   |
| Space group                        | $I2/a$                                                       |
| $a/\text{\AA}$                     | 19.3991(4)                                                   |
| $b/\text{\AA}$                     | 11.4101(2)                                                   |
| $c/\text{\AA}$                     | 31.8762(7)                                                   |
| $\alpha^\circ$                     | 90                                                           |
| $\beta^\circ$                      | 103.192(2)                                                   |
| $\gamma^\circ$                     | 90                                                           |
| Volume/ $\text{\AA}^3$             | 6869.4(3)                                                    |
| Z                                  | 8                                                            |
| $\rho_{\text{calc}}/\text{g/cm}^3$ | 1.355                                                        |
| $\mu/\text{mm}^{-1}$               | 5.109                                                        |
| F(000)                             | 2904.0                                                       |
| Crystal size/ $\text{mm}^3$        | $0.25 \times 0.2 \times 0.18$                                |
| Radiation                          | $\text{CuK}\alpha$ ( $\lambda = 1.54184$ )                   |

|                                             |                                                               |
|---------------------------------------------|---------------------------------------------------------------|
| 2 $\theta$ range for data collection/°      | 8.256 to 134.152                                              |
| Index ranges                                | -23 ≤ h ≤ 20, -9 ≤ k ≤ 13, -30 ≤ l ≤ 38                       |
| Reflections collected                       | 12337                                                         |
| Independent reflections                     | 6122 [R <sub>int</sub> = 0.0204, R <sub>sigma</sub> = 0.0277] |
| Data/restraints/parameters                  | 6122/0/396                                                    |
| Goodness-of-fit on F <sup>2</sup>           | 1.037                                                         |
| Final R indexes [I ≥ 2σ(I)]                 | R <sub>1</sub> = 0.0280, wR <sub>2</sub> = 0.0705             |
| Final R indexes [all data]                  | R <sub>1</sub> = 0.0308, wR <sub>2</sub> = 0.0722             |
| Largest diff. peak/hole / e Å <sup>-3</sup> | 0.84/-0.72                                                    |

**Table S2.** Bond Lengths for Ru-based complex

| Atom | Atom | Length/Å   | Atom | Atom | Length/Å |
|------|------|------------|------|------|----------|
| Ru1  | S1   | 2.3137(5)  | C6   | C9   | 1.499(3) |
| Ru1  | S2   | 2.3785(5)  | C10  | C11  | 1.524(3) |
| Ru1  | O1   | 2.2767(14) | C13  | C14  | 1.395(3) |
| Ru1  | C12  | 2.030(2)   | C13  | C18  | 1.401(3) |
| Ru1  | C31  | 1.837(2)   | C14  | C15  | 1.398(4) |
| S1   | C32  | 1.696(2)   | C14  | C19  | 1.507(4) |
| S2   | C33  | 1.707(2)   | C15  | C16  | 1.378(4) |
| O1   | C22  | 1.493(3)   | C16  | C17  | 1.389(4) |
| O1   | C25  | 1.399(3)   | C16  | C20  | 1.514(4) |
| O2   | C35  | 1.206(3)   | C17  | C18  | 1.391(4) |
| O3   | C34  | 1.207(3)   | C18  | C21  | 1.510(4) |
| N1   | C1   | 1.439(3)   | C22  | C23  | 1.516(3) |
| N1   | C10  | 1.476(3)   | C22  | C24  | 1.514(3) |
| N1   | C12  | 1.339(3)   | C25  | C26  | 1.397(3) |
| N2   | C11  | 1.479(3)   | C25  | C30  | 1.387(3) |
| N2   | C12  | 1.338(3)   | C26  | C27  | 1.394(3) |
| N2   | C13  | 1.435(3)   | C26  | C31  | 1.447(3) |
| C1   | C2   | 1.393(3)   | C27  | C28  | 1.380(4) |
| C1   | C6   | 1.409(3)   | C28  | C29  | 1.388(4) |
| C2   | C3   | 1.400(3)   | C29  | C30  | 1.381(4) |
| C2   | C7   | 1.504(3)   | C32  | C33  | 1.382(3) |
| C3   | C4   | 1.385(3)   | C32  | C35  | 1.480(3) |
| C4   | C5   | 1.392(3)   | C33  | C34  | 1.473(3) |
| C4   | C8   | 1.510(3)   | C34  | C35  | 1.553(3) |
| C5   | C6   | 1.388(3)   |      |      |          |



**Table S3.** Bond Angles for Ru-based complex

| Atom | Atom | Atom | Angle/°    | Atom | Atom | Atom | Angle/°    |
|------|------|------|------------|------|------|------|------------|
| S1   | Ru1  | S2   | 90.635(19) | C14  | C13  | N2   | 120.0(2)   |
| O1   | Ru1  | S1   | 170.49(4)  | C14  | C13  | C18  | 121.6(2)   |
| O1   | Ru1  | S2   | 90.68(4)   | C18  | C13  | N2   | 118.3(2)   |
| C12  | Ru1  | S1   | 85.60(6)   | C13  | C14  | C15  | 117.8(2)   |
| C12  | Ru1  | S2   | 143.96(6)  | C13  | C14  | C19  | 121.9(2)   |
| C12  | Ru1  | O1   | 98.80(7)   | C15  | C14  | C19  | 120.2(2)   |
| C31  | Ru1  | S1   | 91.17(7)   | C16  | C15  | C14  | 122.0(3)   |
| C31  | Ru1  | S2   | 117.04(7)  | C15  | C16  | C17  | 118.8(2)   |
| C31  | Ru1  | O1   | 79.85(8)   | C15  | C16  | C20  | 120.8(3)   |
| C31  | Ru1  | C12  | 98.89(9)   | C17  | C16  | C20  | 120.4(3)   |
| C32  | S1   | Ru1  | 100.54(8)  | C16  | C17  | C18  | 121.6(3)   |
| C33  | S2   | Ru1  | 98.69(8)   | C13  | C18  | C21  | 121.5(2)   |
| C22  | O1   | Ru1  | 119.92(13) | C17  | C18  | C13  | 118.1(2)   |
| C25  | O1   | Ru1  | 108.45(12) | C17  | C18  | C21  | 120.5(2)   |
| C25  | O1   | C22  | 118.38(16) | O1   | C22  | C23  | 110.86(19) |
| C1   | N1   | C10  | 122.61(17) | O1   | C22  | C24  | 113.0(2)   |
| C12  | N1   | C1   | 123.45(17) | C24  | C22  | C23  | 113.50(19) |
| C12  | N1   | C10  | 112.93(17) | C26  | C25  | O1   | 114.21(19) |
| C12  | N2   | C11  | 112.58(17) | C30  | C25  | O1   | 124.1(2)   |
| C12  | N2   | C13  | 126.34(18) | C30  | C25  | C26  | 121.6(2)   |
| C13  | N2   | C11  | 120.45(17) | C25  | C26  | C31  | 118.5(2)   |
| C2   | C1   | N1   | 120.59(18) | C27  | C26  | C25  | 118.8(2)   |
| C2   | C1   | C6   | 121.28(19) | C27  | C26  | C31  | 122.6(2)   |
| C6   | C1   | N1   | 118.07(19) | C28  | C27  | C26  | 119.9(3)   |
| C1   | C2   | C3   | 118.3(2)   | C27  | C28  | C29  | 120.2(3)   |
| C1   | C2   | C7   | 122.7(2)   | C30  | C29  | C28  | 121.1(3)   |
| C3   | C2   | C7   | 118.9(2)   | C29  | C30  | C25  | 118.3(3)   |
| C4   | C3   | C2   | 121.7(2)   | C26  | C31  | Ru1  | 118.89(16) |
| C3   | C4   | C5   | 118.5(2)   | C33  | C32  | S1   | 125.05(18) |
| C3   | C4   | C8   | 121.1(2)   | C33  | C32  | C35  | 93.24(19)  |
| C5   | C4   | C8   | 120.4(2)   | C35  | C32  | S1   | 141.70(18) |
| C6   | C5   | C4   | 122.0(2)   | C32  | C33  | S2   | 125.06(18) |
| C1   | C6   | C9   | 121.18(19) | C32  | C33  | C34  | 93.39(19)  |

|    |     |     |            |     |     |     |            |
|----|-----|-----|------------|-----|-----|-----|------------|
| C5 | C6  | C1  | 118.1(2)   | C34 | C33 | S2  | 141.55(18) |
| C5 | C6  | C9  | 120.7(2)   | O3  | C34 | C33 | 137.4(2)   |
| N1 | C10 | C11 | 102.62(17) | O3  | C34 | C35 | 135.7(2)   |
| N2 | C11 | C10 | 102.96(17) | C33 | C34 | C35 | 86.91(18)  |
| N1 | C12 | Ru1 | 115.90(15) | O2  | C35 | C32 | 137.4(2)   |
| N2 | C12 | Ru1 | 134.13(15) | O2  | C35 | C34 | 136.2(2)   |
| N2 | C12 | N1  | 108.90(18) | C32 | C35 | C34 | 86.46(18)  |

**Table S4.** Torsion Angles for Ru-based complex.

| A   | B   | C   | D   | Angle/°     | A   | B   | C   | D   | Angle/°     |
|-----|-----|-----|-----|-------------|-----|-----|-----|-----|-------------|
| Ru1 | S1  | C32 | C33 | -1.4(2)     | C10 | N1  | C12 | N2  | 0.7(2)      |
| Ru1 | S1  | C32 | C35 | 178.0(3)    | C11 | N2  | C12 | Ru1 | -168.11(17) |
| Ru1 | S2  | C33 | C32 | 0.3(2)      | C11 | N2  | C12 | N1  | -0.9(3)     |
| Ru1 | S2  | C33 | C34 | -178.7(3)   | C11 | N2  | C13 | C14 | 85.0(3)     |
| Ru1 | O1  | C22 | C23 | -90.44(19)  | C11 | N2  | C13 | C18 | -92.2(3)    |
| Ru1 | O1  | C22 | C24 | 140.87(16)  | C12 | Ru1 | C31 | C26 | -96.12(18)  |
| Ru1 | O1  | C25 | C26 | 2.2(2)      | C12 | N1  | C1  | C2  | 97.2(2)     |
| Ru1 | O1  | C25 | C30 | -174.0(2)   | C12 | N1  | C1  | C6  | -85.4(3)    |
| S1  | Ru1 | C31 | C26 | 178.15(17)  | C12 | N1  | C10 | C11 | -0.3(2)     |
| S1  | C32 | C33 | S2  | 0.9(3)      | C12 | N2  | C11 | C10 | 0.7(3)      |
| S1  | C32 | C33 | C34 | -179.78(17) | C12 | N2  | C13 | C14 | -104.8(3)   |
| S1  | C32 | C35 | O2  | -0.6(5)     | C12 | N2  | C13 | C18 | 78.0(3)     |
| S1  | C32 | C35 | C34 | 179.9(2)    | C13 | N2  | C11 | C10 | 172.13(19)  |
| S2  | Ru1 | C31 | C26 | 86.84(18)   | C13 | N2  | C12 | Ru1 | 21.0(3)     |
| S2  | C33 | C34 | O3  | -1.8(5)     | C13 | N2  | C12 | N1  | -171.7(2)   |
| S2  | C33 | C34 | C35 | 178.6(2)    | C13 | C14 | C15 | C16 | 2.4(4)      |
| O1  | Ru1 | C31 | C26 | 1.30(17)    | C14 | C13 | C18 | C17 | 1.2(3)      |
| O1  | C25 | C26 | C27 | -178.2(2)   | C14 | C13 | C18 | C21 | -178.9(2)   |
| O1  | C25 | C26 | C31 | -1.5(3)     | C14 | C15 | C16 | C17 | -0.5(4)     |
| O1  | C25 | C30 | C29 | 177.2(3)    | C14 | C15 | C16 | C20 | 179.1(3)    |
| O3  | C34 | C35 | O2  | 1.4(5)      | C15 | C16 | C17 | C18 | -1.1(4)     |
| O3  | C34 | C35 | C32 | -179.1(3)   | C16 | C17 | C18 | C13 | 0.7(4)      |
| N1  | C1  | C2  | C3  | 179.68(19)  | C16 | C17 | C18 | C21 | -179.2(2)   |
| N1  | C1  | C2  | C7  | 1.8(3)      | C18 | C13 | C14 | C15 | -2.7(3)     |
| N1  | C1  | C6  | C5  | -179.18(18) | C18 | C13 | C14 | C19 | 174.5(2)    |
| N1  | C1  | C6  | C9  | -0.3(3)     | C19 | C14 | C15 | C16 | -174.9(2)   |
| N1  | C10 | C11 | N2  | -0.2(2)     | C20 | C16 | C17 | C18 | 179.3(3)    |
| N2  | C13 | C14 | C15 | -179.8(2)   | C22 | O1  | C25 | C26 | -138.8(2)   |
| N2  | C13 | C14 | C19 | -2.6(3)     | C22 | O1  | C25 | C30 | 44.9(3)     |

|                |             |                 |             |
|----------------|-------------|-----------------|-------------|
| N2 C13 C18 C17 | 178.3(2)    | C25 O1 C22 C23  | 46.1(3)     |
| N2 C13 C18 C21 | -1.8(3)     | C25 O1 C22 C24  | -82.6(2)    |
| C1 N1 C10 C11  | -169.15(19) | C25 C26 C27 C28 | 1.1(4)      |
| C1 N1 C12 Ru1  | -20.7(3)    | C25 C26 C31 Ru1 | -0.4(3)     |
| C1 N1 C12 N2   | 169.47(19)  | C26 C25 C30 C29 | 1.2(4)      |
| C1 C2 C3 C4    | -1.5(3)     | C26 C27 C28 C29 | 0.1(5)      |
| C2 C1 C6 C5    | -1.8(3)     | C27 C26 C31 Ru1 | 176.2(2)    |
| C2 C1 C6 C9    | 177.05(19)  | C27 C28 C29 C30 | -0.7(6)     |
| C2 C3 C4 C5    | 0.2(3)      | C28 C29 C30 C25 | 0.1(5)      |
| C2 C3 C4 C8    | -179.0(2)   | C30 C25 C26 C27 | -1.8(4)     |
| C3 C4 C5 C6    | 0.4(3)      | C30 C25 C26 C31 | 174.9(2)    |
| C4 C5 C6 C1    | 0.4(3)      | C31 C26 C27 C28 | -175.5(3)   |
| C4 C5 C6 C9    | -178.5(2)   | C32 C33 C34 O3  | 179.0(3)    |
| C6 C1 C2 C3    | 2.4(3)      | C32 C33 C34 C35 | -0.52(18)   |
| C6 C1 C2 C7    | -175.5(2)   | C33 C32 C35 O2  | 179.0(3)    |
| C7 C2 C3 C4    | 176.4(2)    | C33 C32 C35 C34 | -0.52(18)   |
| C8 C4 C5 C6    | 179.6(2)    | C33 C34 C35 O2  | -179.0(3)   |
| C10 N1 C1 C2   | -95.1(3)    | C33 C34 C35 C32 | 0.49(17)    |
| C10 N1 C1 C6   | 82.3(2)     | C35 C32 C33 S2  | -178.80(17) |
| C10 N1 C12 Ru1 | 170.57(14)  | C35 C32 C33 C34 | 0.55(19)    |

---

The data of DFT calculations

Cat.\_L1

E(BP86)= -2433.65493267 Hartree

|    |             |             |             |
|----|-------------|-------------|-------------|
| Ru | -0.18236200 | -0.40239900 | 0.37089700  |
| S  | -1.20921000 | 0.94892400  | 1.98449700  |
| S  | -1.90929500 | -2.06043300 | 0.56350500  |
| O  | 1.00620700  | -1.86901100 | -0.94816200 |
| O  | -4.74289000 | 1.21826200  | 3.11135200  |
| O  | -5.42732800 | -1.76442900 | 1.72278000  |
| N  | -0.74203800 | 1.85530900  | -1.36680300 |
| N  | 1.40466500  | 1.94604500  | -0.86390700 |
| C  | -1.99271900 | 1.17000500  | -1.56967400 |
| C  | -3.13273100 | 1.54843200  | -0.82382700 |
| C  | -4.27298200 | 0.73210200  | -0.91489400 |
| C  | -4.31231700 | -0.40998900 | -1.73448800 |
| C  | -3.19762100 | -0.68533600 | -2.54850100 |
| C  | -2.03125800 | 0.09038600  | -2.48755100 |
| C  | -3.16109800 | 2.80160100  | 0.01782600  |
| C  | -5.51555700 | -1.32231100 | -1.71455800 |
| C  | -0.84999100 | -0.21325100 | -3.38207400 |
| C  | -0.25269200 | 2.97101800  | -2.20153600 |
| C  | 1.17555200  | 3.18276500  | -1.64933800 |
| C  | 0.26116800  | 1.23892600  | -0.67739500 |
| C  | 2.68656500  | 1.62640100  | -0.31506100 |
| C  | 3.02996000  | 2.07961300  | 0.97507000  |
| C  | 4.29996000  | 1.73600500  | 1.47404200  |
| C  | 5.21133700  | 0.97398500  | 0.72348700  |
| C  | 4.83234700  | 0.54630000  | -0.56296500 |
| C  | 3.57578900  | 0.85799000  | -1.09972700 |
| C  | 2.05331100  | 2.88095700  | 1.80100900  |
| C  | 6.56237800  | 0.59461000  | 1.28454500  |
| C  | 3.16426900  | 0.35793900  | -2.46445200 |
| C  | 2.22013300  | -2.16232600 | -0.33171800 |
| C  | 2.41452700  | -1.48977200 | 0.90180800  |
| C  | 3.61973300  | -1.73375700 | 1.59966400  |
| C  | 4.58857200  | -2.59894100 | 1.07600100  |
| C  | 4.36786100  | -3.23946000 | -0.15506900 |
| C  | 3.17068800  | -3.03302200 | -0.86681000 |
| C  | 1.36188600  | -0.61524800 | 1.38284200  |
| C  | -2.68697800 | 0.09177200  | 2.15149900  |
| C  | -2.97716800 | -1.14975400 | 1.56294700  |
| C  | -4.42646300 | -1.09969000 | 1.94773300  |
| C  | -4.10596800 | 0.30739100  | 2.60628300  |
| H  | -5.14611500 | 0.98143200  | -0.30005200 |

|   |             |             |             |
|---|-------------|-------------|-------------|
| H | -3.22999900 | -1.54458000 | -3.22974700 |
| H | -2.14754600 | 3.12562300  | 0.29690300  |
| H | -3.73300700 | 2.64408300  | 0.94713100  |
| H | -3.65307200 | 3.62144700  | -0.54185600 |
| H | -5.45439200 | -2.09208300 | -2.50231500 |
| H | -6.45402600 | -0.75603800 | -1.85434700 |
| H | -5.58754200 | -1.82980100 | -0.73465400 |
| H | -0.67845300 | 0.59455200  | -4.11864800 |
| H | -1.02137500 | -1.14115800 | -3.95258300 |
| H | 0.08359200  | -0.32917700 | -2.80456600 |
| H | -0.89741900 | 3.85681800  | -2.08031700 |
| H | -0.25048900 | 2.68081700  | -3.26967000 |
| H | 1.93660700  | 3.28458100  | -2.44085400 |
| H | 1.24312700  | 4.06637800  | -0.98722900 |
| H | 4.58105400  | 2.07343000  | 2.47926200  |
| H | 5.52294200  | -0.06913600 | -1.15150900 |
| H | 1.71764900  | 3.79293500  | 1.27459800  |
| H | 2.50795800  | 3.19244500  | 2.75560800  |
| H | 1.14563700  | 2.29450500  | 2.03001800  |
| H | 7.38482700  | 0.96824000  | 0.64735900  |
| H | 6.66791400  | -0.50485500 | 1.33698800  |
| H | 6.70956800  | 0.99973500  | 2.29976800  |
| H | 2.26737900  | -0.28121000 | -2.39348300 |
| H | 3.97297700  | -0.23455300 | -2.92264600 |
| H | 2.91628600  | 1.18618900  | -3.15397200 |
| H | 3.77901900  | -1.22872800 | 2.55785700  |
| H | 5.51329000  | -2.78599000 | 1.63170000  |
| H | 5.12281100  | -3.91758900 | -0.56626100 |
| H | 2.99776300  | -3.54466800 | -1.81749100 |
| H | 1.48356300  | -0.20508400 | 2.39985500  |
| C | 0.40987600  | -2.90920100 | -1.76056000 |
| H | 0.94389900  | -2.99158400 | -2.72267000 |
| H | 0.43593500  | -3.86669600 | -1.21497200 |
| H | -0.62889100 | -2.59550300 | -1.92483300 |

TS1\_L1

E(BP86)= -2433.62393383 Hartree

|    |             |             |             |
|----|-------------|-------------|-------------|
| Ru | -0.18280700 | 0.28216600  | -0.62588400 |
| S  | -1.89162600 | 0.52217200  | -2.08615200 |
| S  | -1.45401900 | 1.49894100  | 0.80066300  |
| O  | 1.45486000  | 1.45875000  | 1.70839100  |
| N  | -0.71911100 | -2.39166200 | 0.62889300  |
| N  | 1.45489400  | -2.11761600 | 0.41332700  |
| C  | -2.11373700 | -2.05920200 | 0.67296000  |

|   |             |             |             |
|---|-------------|-------------|-------------|
| C | -2.90201700 | -2.33617500 | -0.46239000 |
| C | -4.22794400 | -1.87602200 | -0.47179800 |
| C | -4.76699100 | -1.15496200 | 0.60799300  |
| C | -3.96617200 | -0.95007500 | 1.74543700  |
| C | -2.63443200 | -1.38821300 | 1.79910900  |
| C | -2.30595000 | -3.03764500 | -1.65789100 |
| C | -6.14868100 | -0.55117500 | 0.52116500  |
| C | -1.76702800 | -1.10444000 | 3.00186300  |
| C | -0.15985900 | -3.58368800 | 1.29740900  |
| C | 1.32311700  | -3.51597900 | 0.88712800  |
| C | 0.24168500  | -1.52310800 | 0.19776400  |
| C | 2.71518200  | -1.63914000 | -0.06663800 |
| C | 3.00435200  | -1.70789100 | -1.44772900 |
| C | 4.24116600  | -1.20793100 | -1.88841100 |
| C | 5.18150600  | -0.66223800 | -0.99644800 |
| C | 4.86884000  | -0.63734600 | 0.37393100  |
| C | 3.64574900  | -1.12359700 | 0.86095900  |
| C | 1.99240900  | -2.25976500 | -2.42173500 |
| C | 6.48699800  | -0.08460500 | -1.49241300 |
| C | 3.32375800  | -1.08029800 | 2.33513700  |
| C | 2.51500500  | 1.97936100  | 1.03088200  |
| C | 2.50462500  | 1.78309300  | -0.38810100 |
| C | 3.59650700  | 2.30701300  | -1.12621000 |
| C | 4.65497700  | 2.98201000  | -0.50973000 |
| C | 4.64535200  | 3.14825000  | 0.88460600  |
| C | 3.58048100  | 2.64996400  | 1.65419200  |
| C | 1.50066600  | 0.99176200  | -1.05415200 |
| H | -4.84168900 | -2.04649200 | -1.36445900 |
| H | -4.37208300 | -0.38479200 | 2.59304500  |
| H | -1.60028800 | -2.36527600 | -2.17884800 |
| H | -3.09099300 | -3.32687500 | -2.37608000 |
| H | -1.74602200 | -3.94542700 | -1.36916500 |
| H | -6.80828000 | -1.13630100 | -0.14304200 |
| H | -6.08313800 | 0.47401600  | 0.11064000  |
| H | -6.62682500 | -0.48244800 | 1.51392700  |
| H | -1.63844000 | -2.00160900 | 3.63889800  |
| H | -2.21468500 | -0.31336100 | 3.62510000  |
| H | -0.76510200 | -0.76385700 | 2.68822800  |
| H | -0.66778900 | -4.49879100 | 0.95021800  |
| H | -0.29509300 | -3.50472500 | 2.39353400  |
| H | 2.01563900  | -3.71159300 | 1.72223700  |
| H | 1.56604500  | -4.21519100 | 0.06322800  |
| H | 4.47234600  | -1.23838800 | -2.96059700 |
| H | 5.58217200  | -0.19700800 | 1.08078900  |

|   |             |             |             |
|---|-------------|-------------|-------------|
| H | 1.64473600  | -3.26833000 | -2.13309400 |
| H | 2.41421000  | -2.32087400 | -3.43861000 |
| H | 1.08989100  | -1.61729500 | -2.45856600 |
| H | 7.35359000  | -0.53039400 | -0.97092700 |
| H | 6.51838300  | 1.00486100  | -1.30653100 |
| H | 6.61869700  | -0.24962100 | -2.57520100 |
| H | 2.25818700  | -0.84932700 | 2.49356700  |
| H | 3.93193100  | -0.31179600 | 2.84109500  |
| H | 3.53717800  | -2.04797400 | 2.82982300  |
| H | 3.59594700  | 2.15625400  | -2.21147000 |
| H | 5.47630200  | 3.38587400  | -1.11099100 |
| H | 5.46460300  | 3.67715200  | 1.38395800  |
| H | 3.58525800  | 2.78859700  | 2.73867400  |
| H | 1.67983200  | 0.85650200  | -2.14223900 |
| C | 1.27895200  | 1.81629800  | 3.07856000  |
| H | 2.06203400  | 1.36885600  | 3.72115600  |
| H | 1.27934900  | 2.91474000  | 3.20257100  |
| H | 0.29291200  | 1.41562000  | 3.35492700  |
| C | -3.13894500 | 1.56682900  | -1.36392200 |
| C | -4.31587000 | 1.91968000  | -2.05282000 |
| C | -2.94439200 | 1.98694500  | -0.03321400 |
| C | -5.29721800 | 2.68431100  | -1.40807800 |
| H | -4.45717200 | 1.58452900  | -3.08721500 |
| C | -3.93499500 | 2.75463600  | 0.61294600  |
| C | -5.10630300 | 3.10034000  | -0.07302500 |
| H | -6.21449000 | 2.95589100  | -1.94226700 |
| H | -3.78098200 | 3.07051700  | 1.65187200  |
| H | -5.87645900 | 3.69418800  | 0.43188800  |

2\_L1

E(BP86)= -2433.62950918 Hartree

|    |             |             |             |
|----|-------------|-------------|-------------|
| Ru | -0.16328200 | 0.17088800  | -0.85790800 |
| S  | -2.02030600 | 0.95666200  | -2.03043600 |
| S  | -0.80387900 | 1.49391900  | 0.86981000  |
| O  | 2.09982500  | 2.14400300  | 0.97111200  |
| N  | -1.15195600 | -2.10244600 | 0.72914800  |
| N  | 1.04792200  | -2.24963800 | 0.54944900  |
| C  | -2.50574100 | -1.74623600 | 0.39538700  |
| C  | -3.01660100 | -2.07339700 | -0.87890200 |
| C  | -4.33371200 | -1.68915700 | -1.17936500 |
| C  | -5.13693400 | -1.00700900 | -0.25071500 |
| C  | -4.60748700 | -0.73738200 | 1.02348000  |
| C  | -3.29924800 | -1.10358900 | 1.37289800  |
| C  | -2.15610700 | -2.74578500 | -1.91969300 |

|   |             |             |             |
|---|-------------|-------------|-------------|
| C | -6.53973000 | -0.56690600 | -0.60277800 |
| C | -2.74190000 | -0.78543300 | 2.73692000  |
| C | -0.85011800 | -3.42792200 | 1.30876400  |
| C | 0.68863500  | -3.41538000 | 1.38982400  |
| C | -0.04239200 | -1.48512900 | 0.22581600  |
| C | 2.40612500  | -1.79458200 | 0.52808100  |
| C | 3.25184600  | -2.23246300 | -0.51200300 |
| C | 4.58960100  | -1.80447800 | -0.50265100 |
| C | 5.08950800  | -0.96706000 | 0.51025600  |
| C | 4.21600000  | -0.55981600 | 1.53583700  |
| C | 2.87108100  | -0.95892100 | 1.56866500  |
| C | 2.70978200  | -3.11261700 | -1.61336800 |
| C | 6.51781600  | -0.47637400 | 0.47798800  |
| C | 1.93766000  | -0.48784300 | 2.65613200  |
| C | 3.07730000  | 2.09028000  | 0.03579100  |
| C | 2.83088200  | 1.22159200  | -1.07488800 |
| C | 3.84372900  | 1.11845200  | -2.06245500 |
| C | 5.03574900  | 1.84340400  | -1.98655100 |
| C | 5.24410000  | 2.70315800  | -0.89492600 |
| C | 4.27639600  | 2.82313400  | 0.11440700  |
| C | 1.63513300  | 0.42791400  | -1.20750900 |
| H | -4.73206800 | -1.90770400 | -2.17759700 |
| H | -5.21602900 | -0.19468400 | 1.75591900  |
| H | -1.43613500 | -2.01402000 | -2.33731200 |
| H | -2.77018700 | -3.13121000 | -2.75048000 |
| H | -1.56528600 | -3.58313400 | -1.50750600 |
| H | -7.29750700 | -1.10681700 | -0.00399600 |
| H | -6.76228800 | -0.74408100 | -1.66866400 |
| H | -6.66443800 | 0.51148300  | -0.40124400 |
| H | -2.38398400 | -1.69091500 | 3.26218200  |
| H | -3.50808000 | -0.30652200 | 3.36810700  |
| H | -1.88137400 | -0.09676000 | 2.64108600  |
| H | -1.23048200 | -4.22483400 | 0.64105600  |
| H | -1.33651800 | -3.54241600 | 2.29204500  |
| H | 1.05525600  | -3.26427500 | 2.42228900  |
| H | 1.15089900  | -4.33586000 | 0.99404700  |
| H | 5.25727100  | -2.12620500 | -1.31130100 |
| H | 4.59108400  | 0.09907300  | 2.32898000  |
| H | 2.38561500  | -4.09873600 | -1.23123800 |
| H | 3.47225500  | -3.28811900 | -2.39051700 |
| H | 1.82528400  | -2.65286000 | -2.09047100 |
| H | 6.93602100  | -0.37726300 | 1.49507300  |
| H | 6.56611600  | 0.51941700  | -0.00014900 |
| H | 7.16823100  | -1.15625400 | -0.09878100 |



|   |             |             |             |
|---|-------------|-------------|-------------|
| H | 1.05321300  | 0.01356400  | 2.22662800  |
| H | 2.44797800  | 0.22698200  | 3.32217000  |
| H | 1.57283600  | -1.32284200 | 3.28397500  |
| H | 3.66374800  | 0.44394500  | -2.90743400 |
| H | 5.79355200  | 1.74564500  | -2.77031900 |
| H | 6.16810400  | 3.28752100  | -0.82077700 |
| H | 4.46024200  | 3.48786900  | 0.96198700  |
| H | 1.67291300  | -0.23467000 | -2.13183100 |
| C | 2.24556300  | 3.04859700  | 2.06325500  |
| H | 3.10915400  | 2.77484000  | 2.70074200  |
| H | 2.36334800  | 4.08968700  | 1.70888800  |
| H | 1.31095600  | 2.95769400  | 2.63464300  |
| C | -2.97091400 | 1.83616300  | -0.82049100 |
| C | -4.26960800 | 2.29749500  | -1.11945700 |
| C | -2.46009300 | 2.00513300  | 0.48906500  |
| C | -5.06465800 | 2.87601500  | -0.12193300 |
| C | -3.26550800 | 2.58773500  | 1.48988000  |
| C | -4.56455900 | 3.01370700  | 1.18850800  |
| H | -6.07753200 | 3.21825200  | -0.36329000 |
| H | -5.18895900 | 3.45506800  | 1.97349900  |
| H | -4.65581200 | 2.17095300  | -2.13708600 |
| H | -2.86599100 | 2.69058000  | 2.50597300  |

### 3\_L1

E(BP86)= -2433.61463231 Hartree

|    |             |             |             |
|----|-------------|-------------|-------------|
| Ru | -0.67245200 | 0.00592500  | 0.43639900  |
| O  | 1.41662100  | 2.89605600  | 2.26752600  |
| N  | -2.01832400 | -2.44762100 | -0.20444900 |
| N  | 0.10990300  | -2.99319800 | -0.20735000 |
| C  | -3.13288900 | -1.54731100 | -0.07909500 |
| C  | -3.65327000 | -0.90624500 | -1.22523800 |
| C  | -4.66240400 | 0.05410100  | -1.03528900 |
| C  | -5.13598800 | 0.39450100  | 0.24161500  |
| C  | -4.61189200 | -0.28408000 | 1.35883500  |
| C  | -3.61032100 | -1.25525100 | 1.22282300  |
| C  | -3.07161300 | -1.14846500 | -2.59465300 |
| C  | -6.14942100 | 1.50145900  | 0.42027700  |
| C  | -3.01401800 | -1.93888200 | 2.43348700  |
| C  | -2.05900900 | -3.86415300 | -0.61455500 |
| C  | -0.58258900 | -4.28946800 | -0.41690600 |
| C  | -0.75831700 | -1.96970100 | -0.01810800 |
| C  | 1.53466000  | -2.90589200 | -0.10356800 |
| C  | 2.29586600  | -2.82675200 | -1.29028500 |
| C  | 3.69425600  | -2.73919000 | -1.17291700 |

|   |             |             |             |
|---|-------------|-------------|-------------|
| C | 4.33019300  | -2.69669800 | 0.08074000  |
| C | 3.53730200  | -2.79141400 | 1.23894800  |
| C | 2.13940900  | -2.90670300 | 1.17188700  |
| C | 1.62026800  | -2.75303600 | -2.63866600 |
| C | 5.82216100  | -2.47884600 | 0.18528400  |
| C | 1.29983400  | -2.98762500 | 2.42399000  |
| C | 2.30988000  | 2.38933700  | 1.36158500  |
| C | 2.06163500  | 1.04932100  | 0.94254000  |
| C | 2.92233800  | 0.47794700  | -0.01383000 |
| C | 4.01105800  | 1.18754400  | -0.53125800 |
| C | 4.23259400  | 2.51174500  | -0.11905400 |
| C | 3.38276100  | 3.11879900  | 0.81779300  |
| C | 0.84008800  | 0.39494800  | 1.41150100  |
| H | -5.05879100 | 0.57931400  | -1.91258800 |
| H | -4.97513700 | -0.03163700 | 2.36249800  |
| H | -2.09078100 | -0.63527100 | -2.67301700 |
| H | -3.73140000 | -0.73916000 | -3.37750100 |
| H | -2.90861100 | -2.21886500 | -2.81007000 |
| H | -6.79471900 | 1.32609900  | 1.29864100  |
| H | -6.79429600 | 1.61008500  | -0.46861600 |
| H | -5.63335300 | 2.46761700  | 0.57517900  |
| H | -3.00055900 | -3.03831900 | 2.32268700  |
| H | -3.58269500 | -1.68865000 | 3.34403000  |
| H | -1.96385600 | -1.62727500 | 2.59521000  |
| H | -2.38834800 | -3.96203400 | -1.66638500 |
| H | -2.75853000 | -4.43484900 | 0.01995200  |
| H | -0.44410300 | -4.93660300 | 0.47018000  |
| H | -0.16483800 | -4.81437600 | -1.29195100 |
| H | 4.29754300  | -2.66084700 | -2.08571200 |
| H | 4.01884200  | -2.76065500 | 2.22400200  |
| H | 0.93158300  | -3.59924400 | -2.81588800 |
| H | 2.36621000  | -2.74993000 | -3.45051500 |
| H | 1.02670000  | -1.82356900 | -2.71532600 |
| H | 6.25247500  | -3.00422000 | 1.05560300  |
| H | 6.03990900  | -1.40091300 | 0.31080800  |
| H | 6.34912800  | -2.82119700 | -0.72183900 |
| H | 0.70585500  | -2.06376300 | 2.54335400  |
| H | 1.93408000  | -3.11100600 | 3.31725900  |
| H | 0.58591300  | -3.83057700 | 2.38948100  |
| H | 2.69803500  | -0.52952100 | -0.36037900 |
| H | 4.66429100  | 0.71787400  | -1.27447000 |
| H | 5.06463800  | 3.08950100  | -0.53727100 |
| H | 3.55063700  | 4.15829900  | 1.11014100  |
| H | 0.63434100  | 0.48545900  | 2.50495200  |

|   |             |            |             |
|---|-------------|------------|-------------|
| C | 1.42296300  | 4.30914000 | 2.47039600  |
| H | 2.35012200  | 4.64810200 | 2.97425400  |
| H | 1.30202700  | 4.83833800 | 1.50711100  |
| H | 0.55872800  | 4.51775100 | 3.11805700  |
| C | -0.64131000 | 3.00083400 | -0.61922000 |
| C | -0.55968500 | 4.40657800 | -0.54770100 |
| C | 0.35547000  | 5.10951800 | -1.34507100 |
| C | 1.20206900  | 4.41275000 | -2.22810900 |
| C | 1.11830000  | 3.01827800 | -2.32316400 |
| C | 0.18903200  | 2.30728700 | -1.53842100 |
| H | -1.21034500 | 4.93978200 | 0.15529400  |
| H | 0.41936900  | 6.20088700 | -1.26598200 |
| H | 1.93796500  | 4.95613200 | -2.83111100 |
| H | 1.78767800  | 2.46081700 | -2.98775100 |
| S | 0.07619100  | 0.53785500 | -1.66597500 |
| S | -1.72858300 | 2.08819200 | 0.45528500  |

TS2\_L1

E(BP86)= -2433.59916463 Haetree

|    |             |             |             |
|----|-------------|-------------|-------------|
| Ru | 0.92862000  | -0.21294400 | 0.43704600  |
| O  | -3.14630200 | -0.44786200 | 2.64605000  |
| N  | 2.61118900  | 2.01556100  | -0.26983100 |
| N  | 0.52713600  | 2.71344500  | -0.45681400 |
| C  | 3.57402500  | 1.05109100  | 0.16333400  |
| C  | 4.61906900  | 0.65861100  | -0.69773400 |
| C  | 5.40363700  | -0.45028700 | -0.33766100 |
| C  | 5.14288800  | -1.20053300 | 0.82680300  |
| C  | 4.10514500  | -0.78681100 | 1.67372500  |
| C  | 3.29843600  | 0.33532900  | 1.37292100  |
| C  | 4.83095600  | 1.36840100  | -2.01388200 |
| C  | 5.94224500  | -2.44646100 | 1.13659100  |
| C  | 2.31114700  | 0.84940700  | 2.40208300  |
| C  | 2.76592200  | 3.47735900  | -0.39123900 |
| C  | 1.33345500  | 3.90464100  | -0.80499200 |
| C  | 1.29505600  | 1.62132800  | -0.20500400 |
| C  | -0.90389400 | 2.68541800  | -0.51542500 |
| C  | -1.54364700 | 2.39212800  | -1.73752800 |
| C  | -2.94767900 | 2.37342000  | -1.75692200 |
| C  | -3.71122600 | 2.61087200  | -0.59957300 |
| C  | -3.03650500 | 2.88677000  | 0.60176700  |
| C  | -1.63421000 | 2.93241500  | 0.66611700  |
| C  | -0.73966200 | 2.02646600  | -2.96077900 |
| C  | -5.21873000 | 2.52160800  | -0.64430300 |
| C  | -0.91870200 | 3.21601900  | 1.96524500  |

|   |             |             |             |
|---|-------------|-------------|-------------|
| C | -3.36789100 | -0.62779800 | 1.30550000  |
| C | -2.21376100 | -0.52322100 | 0.45793900  |
| C | -2.41329400 | -0.67927000 | -0.93101100 |
| C | -3.67133300 | -0.96899700 | -1.47193700 |
| C | -4.77453700 | -1.10120100 | -0.62009600 |
| C | -4.63147300 | -0.91818900 | 0.76783300  |
| C | -0.90911800 | -0.29185100 | 1.06279600  |
| H | 6.21109600  | -0.76515900 | -1.01001300 |
| H | 3.90107500  | -1.34721100 | 2.59377200  |
| H | 3.86815100  | 1.49654200  | -2.54127600 |
| H | 5.50888400  | 0.79365700  | -2.66592400 |
| H | 5.27245500  | 2.37531400  | -1.88211800 |
| H | 5.93703700  | -2.67264100 | 2.21676800  |
| H | 6.99228800  | -2.34856800 | 0.80952200  |
| H | 5.51526600  | -3.32424700 | 0.61533400  |
| H | 2.31034600  | 1.95201300  | 2.45889400  |
| H | 2.54321600  | 0.43311300  | 3.39671600  |
| H | 1.21167800  | 0.58331600  | 2.25515200  |
| H | 3.52190300  | 3.74890700  | -1.14631400 |
| H | 3.06944400  | 3.91656000  | 0.57961000  |
| H | 0.97473500  | 4.79304400  | -0.25855000 |
| H | 1.26243500  | 4.11431900  | -1.88983500 |
| H | -3.45901900 | 2.13616100  | -2.69767100 |
| H | -3.61597100 | 3.06390300  | 1.51619500  |
| H | 0.03821000  | 2.77542900  | -3.19530300 |
| H | -1.39162000 | 1.92613400  | -3.84451200 |
| H | -0.22384800 | 1.05873300  | -2.80133600 |
| H | -5.68128500 | 3.02159200  | 0.22407300  |
| H | -5.53572300 | 1.46253600  | -0.63157900 |
| H | -5.62600000 | 2.97897600  | -1.56346300 |
| H | -0.24158000 | 2.38452100  | 2.22646400  |
| H | -1.63803700 | 3.34857800  | 2.79006900  |
| H | -0.29778000 | 4.12967200  | 1.90480800  |
| H | -1.54217700 | -0.55032900 | -1.57566300 |
| H | -3.78355700 | -1.09763900 | -2.55296000 |
| H | -5.76318500 | -1.34575200 | -1.02573700 |
| H | -5.50621500 | -1.01634000 | 1.41537700  |
| H | -1.02946800 | 0.00506700  | 2.12174400  |
| C | -4.26691900 | -0.54166900 | 3.52156900  |
| H | -5.03712200 | 0.21638100  | 3.27812100  |
| H | -4.72432600 | -1.54920700 | 3.48763100  |
| H | -3.87203100 | -0.35364200 | 4.53104600  |
| C | -0.43277500 | -3.18103500 | -0.09741600 |
| C | -0.11051500 | -2.68396300 | -1.39027600 |

|   |             |             |             |
|---|-------------|-------------|-------------|
| S | 0.78100900  | -1.15794300 | -1.63818000 |
| S | 0.10898700  | -2.38667800 | 1.39153100  |
| C | -1.21759900 | -4.35086100 | 0.01600600  |
| C | -0.55906500 | -3.39113000 | -2.52825500 |
| C | -1.64908200 | -5.04358600 | -1.11981000 |
| H | -2.25518500 | -5.94949200 | -1.00954300 |
| C | -1.31117800 | -4.56316900 | -2.39891700 |
| H | -1.65008900 | -5.09352400 | -3.29604600 |
| H | -1.47848500 | -4.71067400 | 1.01753100  |
| H | -0.31772800 | -2.99420000 | -3.52130900 |

4\_L1

E(BP86)= -2433.60477698 Hartree

|    |             |             |             |
|----|-------------|-------------|-------------|
| Ru | -1.00762300 | 0.16424100  | 0.46210900  |
| O  | 3.22433800  | 0.22201400  | 2.48103600  |
| N  | -2.38494400 | -2.15077100 | -0.48823400 |
| N  | -0.23159300 | -2.60323600 | -0.64600700 |
| C  | -3.44552900 | -1.35045200 | 0.04138100  |
| C  | -4.53902200 | -0.99593300 | -0.77623600 |
| C  | -5.45717300 | -0.04841500 | -0.29479700 |
| C  | -5.28805400 | 0.58534300  | 0.95403100  |
| C  | -4.19802700 | 0.21540400  | 1.75295200  |
| C  | -3.25530700 | -0.75385500 | 1.33181700  |
| C  | -4.66291300 | -1.56844400 | -2.16817900 |
| C  | -6.24631600 | 1.66570800  | 1.40399600  |
| C  | -2.21133200 | -1.26222800 | 2.30675000  |
| C  | -2.37302500 | -3.60530500 | -0.72941300 |
| C  | -0.89573100 | -3.82944400 | -1.14205200 |
| C  | -1.11987000 | -1.62312800 | -0.33525200 |
| C  | 1.19248400  | -2.45293100 | -0.62629500 |
| C  | 1.86140900  | -2.00906400 | -1.78506400 |
| C  | 3.26294000  | -1.92809400 | -1.74669600 |
| C  | 3.99519300  | -2.26218900 | -0.59452000 |
| C  | 3.29015400  | -2.66802800 | 0.55189700  |
| C  | 1.89015300  | -2.76852900 | 0.55875900  |
| C  | 1.08258900  | -1.56294900 | -2.99790500 |
| C  | 5.50575700  | -2.20734300 | -0.60125700 |
| C  | 1.14658700  | -3.16670900 | 1.81095200  |
| C  | 3.38528700  | 0.61522500  | 1.17044000  |
| C  | 2.18477600  | 0.76220000  | 0.41153400  |
| C  | 2.31977900  | 1.11844300  | -0.94241900 |
| C  | 3.57008200  | 1.38087800  | -1.52145400 |
| C  | 4.72953700  | 1.27186800  | -0.74591700 |
| C  | 4.64191800  | 0.87269400  | 0.59850900  |

|   |             |             |             |
|---|-------------|-------------|-------------|
| C | 0.88288500  | 0.58099300  | 1.10251300  |
| H | -6.30397400 | 0.23644500  | -0.93130800 |
| H | -4.06348800 | 0.68257500  | 2.73596300  |
| H | -3.69587700 | -1.49669700 | -2.69841500 |
| H | -5.42128000 | -1.02230000 | -2.75277200 |
| H | -4.95609200 | -2.63618800 | -2.15965300 |
| H | -6.21119700 | 1.80768000  | 2.49782600  |
| H | -7.28750900 | 1.42955000  | 1.12113800  |
| H | -5.99211900 | 2.63641100  | 0.93727700  |
| H | -2.09922200 | -2.35977800 | 2.25766900  |
| H | -2.47264700 | -0.96882600 | 3.33705900  |
| H | -1.13692300 | -0.88639400 | 2.18330000  |
| H | -3.08132700 | -3.89770300 | -1.52214100 |
| H | -2.63792000 | -4.15598800 | 0.19538700  |
| H | -0.44965400 | -4.72805200 | -0.68399200 |
| H | -0.78356200 | -3.90857100 | -2.24093100 |
| H | 3.79592900  | -1.56853200 | -2.63453500 |
| H | 3.84336100  | -2.90655600 | 1.46892600  |
| H | 0.42315100  | -2.35873100 | -3.39175400 |
| H | 1.76327400  | -1.25654600 | -3.80942300 |
| H | 0.43731000  | -0.70002400 | -2.74363300 |
| H | 5.90875100  | -2.07832600 | 0.41796800  |
| H | 5.86865300  | -1.36690700 | -1.21631900 |
| H | 5.93875300  | -3.13858000 | -1.01526900 |
| H | 0.54309100  | -2.32102100 | 2.18573800  |
| H | 1.84821300  | -3.46567300 | 2.60728900  |
| H | 0.44830000  | -4.00561200 | 1.63549700  |
| H | 1.41469500  | 1.15993700  | -1.55097100 |
| H | 3.62926100  | 1.66705200  | -2.57670700 |
| H | 5.71404800  | 1.48365300  | -1.17880000 |
| H | 5.55535100  | 0.76936700  | 1.18977200  |
| H | 1.06805300  | 0.09899600  | 2.07878500  |
| C | 4.40167300  | -0.03696000 | 3.23666900  |
| H | 5.02194900  | -0.82361200 | 2.76253800  |
| H | 5.01507600  | 0.87618000  | 3.36690800  |
| H | 4.05535700  | -0.38548400 | 4.22146800  |
| C | 0.17758300  | 3.24792800  | 0.13766900  |
| C | -0.30999600 | 2.89658300  | -1.14897000 |
| S | -1.02446300 | 1.31246300  | -1.51702300 |
| S | -0.04505000 | 2.18708200  | 1.56206400  |
| C | 0.81609200  | 4.48532400  | 0.34749700  |
| C | -0.15421500 | 3.83446100  | -2.19711500 |
| C | 0.95616300  | 5.40262900  | -0.70092800 |
| H | 1.45237000  | 6.36321100  | -0.52815400 |

|   |             |            |             |
|---|-------------|------------|-------------|
| C | 0.45956800  | 5.07092100 | -1.97512700 |
| H | 0.56103500  | 5.77892200 | -2.80563400 |
| H | 1.19911400  | 4.71932300 | 1.34687100  |
| H | -0.52021500 | 3.56980100 | -3.19566500 |

Cat.\_L2

E(BP86)= -3352.98991131 Hartree

|    |             |             |             |
|----|-------------|-------------|-------------|
| Ru | -0.12432600 | -0.24353000 | -0.27331600 |
| S  | 1.02341500  | 1.60586800  | -1.00948500 |
| S  | 1.67430200  | -1.55634400 | -0.90071600 |
| O  | -1.38049800 | -2.13698300 | 0.10852800  |
| N  | 0.08673300  | 0.99689500  | 2.36816300  |
| N  | -1.98361300 | 1.29258000  | 1.67282400  |
| C  | 1.34379000  | 0.29856700  | 2.41782800  |
| C  | 2.52641400  | 0.96263500  | 2.02544500  |
| C  | 3.69407100  | 0.19267100  | 1.88764900  |
| C  | 3.71954200  | -1.18066100 | 2.17920600  |
| C  | 2.54668300  | -1.78312200 | 2.67332000  |
| C  | 1.34859800  | -1.06678600 | 2.79609500  |
| C  | 2.56648200  | 2.45401900  | 1.80521800  |
| C  | 4.96751900  | -1.99737900 | 1.94438000  |
| C  | 0.09870000  | -1.73101100 | 3.32890300  |
| C  | -0.56662700 | 1.62504700  | 3.53315400  |
| C  | -1.93201400 | 2.04893200  | 2.94628300  |
| C  | -0.78121500 | 0.75145500  | 1.34360800  |
| C  | -3.15637000 | 1.28108900  | 0.85414400  |
| C  | -3.32478200 | 2.26634300  | -0.14029000 |
| C  | -4.48471300 | 2.20463400  | -0.93398900 |
| C  | -5.45665100 | 1.20610600  | -0.75225300 |
| C  | -5.25538000 | 0.24625300  | 0.25709000  |
| C  | -4.11093100 | 0.26162900  | 1.06647100  |
| C  | -2.27259500 | 3.32364300  | -0.36796500 |
| C  | -6.67898400 | 1.13455400  | -1.63837500 |
| C  | -3.87631200 | -0.80380800 | 2.11125000  |
| C  | -2.48266800 | -2.14513800 | -0.74082700 |
| C  | -2.56235900 | -1.00394300 | -1.57945400 |
| C  | -3.65571500 | -0.92541400 | -2.47241100 |
| C  | -4.62974000 | -1.93168800 | -2.50615300 |
| C  | -4.52436100 | -3.04280000 | -1.65233400 |
| C  | -3.43883300 | -3.16160000 | -0.76328200 |
| C  | -1.52913500 | 0.00991900  | -1.47047300 |
| H  | 4.60358000  | 0.68191500  | 1.51937000  |
| H  | 2.56141100  | -2.84635300 | 2.94417600  |
| H  | 1.57299900  | 2.85464100  | 1.55820100  |

|    |             |             |             |
|----|-------------|-------------|-------------|
| H  | 3.24496800  | 2.71391900  | 0.97747500  |
| H  | 2.93848300  | 2.96159000  | 2.71748700  |
| H  | 5.87696300  | -1.37623300 | 2.01234000  |
| H  | 4.94660500  | -2.44157800 | 0.93204000  |
| H  | 5.05564300  | -2.82508900 | 2.67004400  |
| H  | -0.17563200 | -1.34171200 | 4.32803100  |
| H  | 0.24844100  | -2.81839800 | 3.43444800  |
| H  | -0.76834800 | -1.56412500 | 2.66666400  |
| H  | 0.02854600  | 2.47847800  | 3.89824100  |
| H  | -0.67302900 | 0.89433500  | 4.35794600  |
| H  | -2.78531700 | 1.78059400  | 3.59145700  |
| H  | -1.98072900 | 3.13499900  | 2.74059500  |
| H  | -4.62590400 | 2.95538600  | -1.72136300 |
| H  | -5.99190400 | -0.55430400 | 0.39470000  |
| H  | -2.07061400 | 3.91029800  | 0.54695400  |
| H  | -2.58524900 | 4.02746900  | -1.15675600 |
| H  | -1.31281500 | 2.87050600  | -0.67446800 |
| H  | -7.61262300 | 1.19874000  | -1.04988400 |
| H  | -6.70582700 | 0.17369500  | -2.18500200 |
| H  | -6.68949300 | 1.94964200  | -2.38138400 |
| H  | -2.92507000 | -1.33108900 | 1.92354800  |
| H  | -4.69050100 | -1.54661700 | 2.09977100  |
| H  | -3.81557700 | -0.38012100 | 3.13137100  |
| H  | -3.72741200 | -0.05424700 | -3.13182500 |
| H  | -5.46651600 | -1.86037000 | -3.20904200 |
| H  | -5.28126300 | -3.83363000 | -1.68017600 |
| H  | -3.35202800 | -4.03257200 | -0.10772200 |
| H  | -1.55738600 | 0.82317300  | -2.21541800 |
| C  | -0.82608400 | -3.41393700 | 0.49703300  |
| H  | -1.46900900 | -3.89400200 | 1.25524300  |
| H  | -0.72134500 | -4.05927000 | -0.39056900 |
| H  | 0.16228100  | -3.18838000 | 0.91844900  |
| C  | 2.62882100  | 0.99756500  | -1.43116300 |
| C  | 3.67283200  | 1.88721900  | -1.77584000 |
| C  | 2.91320700  | -0.39858500 | -1.40936000 |
| C  | 4.96086400  | 1.44299000  | -2.09018400 |
| C  | 4.21041200  | -0.82918600 | -1.76115300 |
| C  | 5.23454600  | 0.06735100  | -2.08522900 |
| H  | 5.74012800  | 2.16709800  | -2.34260400 |
| H  | 6.23079700  | -0.30675300 | -2.33472400 |
| Cl | 3.36027200  | 3.62651000  | -1.80739600 |
| Cl | 4.58559100  | -2.55677900 | -1.79152600 |



TS1\_L2

E(BP86)= -3352.95960662 Hartree

|    |             |             |             |
|----|-------------|-------------|-------------|
| Ru | 0.13992800  | -0.00214500 | 0.58110700  |
| S  | -1.61844900 | 0.17043200  | 1.98311400  |
| S  | -1.17728600 | -1.34030200 | -0.66852700 |
| O  | 1.69324000  | -1.75520400 | -1.39513500 |
| N  | -0.09189500 | 2.45822300  | -1.10597600 |
| N  | 2.03824600  | 2.06060500  | -0.71546200 |
| C  | -1.50511600 | 2.21950400  | -1.18687900 |
| C  | -2.32916400 | 2.73547500  | -0.16509200 |
| C  | -3.68767600 | 2.38428400  | -0.17493300 |
| C  | -4.22586700 | 1.54223800  | -1.16455700 |
| C  | -3.38092700 | 1.08340000  | -2.19012700 |
| C  | -2.01461500 | 1.40426100  | -2.21908000 |
| C  | -1.74670000 | 3.58706300  | 0.93686100  |
| C  | -5.66488500 | 1.08890100  | -1.08948100 |
| C  | -1.10651000 | 0.84841900  | -3.28951300 |
| C  | 0.59545400  | 3.49040500  | -1.90858900 |
| C  | 2.05111900  | 3.36656800  | -1.41667600 |
| C  | 0.77240300  | 1.60303500  | -0.48957400 |
| C  | 3.23518800  | 1.53870000  | -0.12983000 |
| C  | 3.52030200  | 1.81030200  | 1.22597000  |
| C  | 4.69622300  | 1.26901100  | 1.77279900  |
| C  | 5.57909400  | 0.48769600  | 1.00636000  |
| C  | 5.26798600  | 0.25339800  | -0.34481900 |
| C  | 4.10530500  | 0.77226400  | -0.93443000 |
| C  | 2.56173200  | 2.61655400  | 2.06825500  |
| C  | 6.83092000  | -0.10203300 | 1.61457200  |
| C  | 3.77103000  | 0.49585200  | -2.38004300 |
| C  | 2.69544000  | -2.21256800 | -0.59605600 |
| C  | 2.67514700  | -1.74342600 | 0.75714100  |
| C  | 3.70315600  | -2.20123000 | 1.62085400  |
| C  | 4.71197700  | -3.06445000 | 1.18206800  |
| C  | 4.71483300  | -3.49634900 | -0.15411800 |
| C  | 3.71146700  | -3.07350700 | -1.04213500 |
| C  | 1.72963600  | -0.76183200 | 1.22658500  |
| H  | -4.33319900 | 2.74337000  | 0.63537300  |
| H  | -3.78330900 | 0.41269800  | -2.95860000 |
| H  | -1.00988400 | 3.00986900  | 1.52372400  |
| H  | -2.53630200 | 3.92590300  | 1.62707000  |
| H  | -1.22871900 | 4.47993000  | 0.53947600  |
| H  | -6.31052400 | 1.85820100  | -0.63124700 |
| H  | -5.74136900 | 0.17740900  | -0.46821300 |
| H  | -6.06707000 | 0.84429400  | -2.08768500 |

|    |             |             |             |
|----|-------------|-------------|-------------|
| H  | -0.86720700 | 1.60541300  | -4.06179000 |
| H  | -1.58289500 | -0.00706900 | -3.79517100 |
| H  | -0.15578100 | 0.49798400  | -2.85157100 |
| H  | 0.15576600  | 4.48416100  | -1.72175900 |
| H  | 0.49566400  | 3.26190900  | -2.98714000 |
| H  | 2.78883900  | 3.36103000  | -2.23574700 |
| H  | 2.32811700  | 4.16932700  | -0.70621900 |
| H  | 4.92383900  | 1.45649700  | 2.82960200  |
| H  | 5.92987000  | -0.37958800 | -0.94740700 |
| H  | 2.35077900  | 3.60670600  | 1.62436400  |
| H  | 2.96400400  | 2.77599300  | 3.08227600  |
| H  | 1.58593000  | 2.09991800  | 2.15998400  |
| H  | 7.74276700  | 0.35883800  | 1.19060700  |
| H  | 6.88661200  | -1.18658600 | 1.41307700  |
| H  | 6.85774200  | 0.04516900  | 2.70752300  |
| H  | 2.69860000  | 0.26663900  | -2.48994900 |
| H  | 4.35611900  | -0.35979400 | -2.75628900 |
| H  | 3.99776400  | 1.36382800  | -3.02927900 |
| H  | 3.69480400  | -1.84494900 | 2.65682200  |
| H  | 5.48515700  | -3.40630800 | 1.87777500  |
| H  | 5.49535700  | -4.17581900 | -0.51371300 |
| H  | 3.72418800  | -3.42021700 | -2.07880900 |
| H  | 1.87989100  | -0.45825700 | 2.28395000  |
| C  | 1.51244200  | -2.35614400 | -2.67868200 |
| H  | 2.33666100  | -2.09349000 | -3.36971300 |
| H  | 1.43383300  | -3.45477000 | -2.59026300 |
| H  | 0.56228700  | -1.95041900 | -3.05483700 |
| C  | -2.94218000 | -0.84905300 | 1.37414300  |
| C  | -4.18877100 | -0.96177200 | 2.01888600  |
| C  | -2.74214300 | -1.51271400 | 0.14285100  |
| C  | -5.23094700 | -1.71794400 | 1.47000300  |
| C  | -3.80291300 | -2.25696900 | -0.41064800 |
| C  | -5.03582200 | -2.37123600 | 0.23882900  |
| H  | -6.18929700 | -1.78767500 | 1.99169500  |
| H  | -5.84094600 | -2.95529300 | -0.21534900 |
| Cl | -3.58016200 | -3.04150100 | -1.97773200 |
| Cl | -4.45767300 | -0.11140000 | 3.54073300  |

2\_L2

E(BP86)= -3352.96375089 Hartree

|    |             |             |             |
|----|-------------|-------------|-------------|
| Ru | -0.21132100 | -0.26965000 | 0.91760000  |
| S  | 1.74916500  | -0.51758500 | 2.12195600  |
| S  | 0.75401400  | 1.52264500  | -0.06944400 |
| O  | -1.87882300 | 2.12311100  | -0.85590100 |

|   |             |             |             |
|---|-------------|-------------|-------------|
| N | 0.37642100  | -1.70796000 | -1.59810600 |
| N | -1.80776900 | -1.64778200 | -1.29736500 |
| C | 1.79316500  | -1.56640000 | -1.41082400 |
| C | 2.44913300  | -2.46277800 | -0.53601500 |
| C | 3.83011100  | -2.31089800 | -0.34781900 |
| C | 4.56481900  | -1.31628000 | -1.01987300 |
| C | 3.88587700  | -0.47198600 | -1.91291100 |
| C | 2.50113300  | -0.58164700 | -2.13166000 |
| C | 1.67572000  | -3.53495900 | 0.19174000  |
| C | 6.05381000  | -1.18183600 | -0.79656600 |
| C | 1.80579100  | 0.33105300  | -3.11288000 |
| C | -0.15720600 | -2.36451000 | -2.80933700 |
| C | -1.64582700 | -2.54370200 | -2.46279100 |
| C | -0.60548800 | -1.25905900 | -0.76061700 |
| C | -3.08665500 | -1.51195100 | -0.67721200 |
| C | -3.38294500 | -2.26328800 | 0.48368000  |
| C | -4.63793300 | -2.08105000 | 1.08801800  |
| C | -5.59480000 | -1.19706100 | 0.55713600  |
| C | -5.28134300 | -0.50098800 | -0.62355200 |
| C | -4.03823100 | -0.64354900 | -1.25785500 |
| C | -2.36122700 | -3.20149800 | 1.07902400  |
| C | -6.91806600 | -0.96804800 | 1.25007500  |
| C | -3.71260200 | 0.13816300  | -2.50732200 |
| C | -2.92748500 | 2.24112200  | -0.00224600 |
| C | -2.94321500 | 1.33492100  | 1.10745100  |
| C | -4.04564400 | 1.41149500  | 1.99742700  |
| C | -5.08524400 | 2.32864500  | 1.82058500  |
| C | -5.04635100 | 3.20106200  | 0.72042300  |
| C | -3.97630100 | 3.16024800  | -0.18728200 |
| C | -1.95800000 | 0.29542300  | 1.29220200  |
| H | 4.34357900  | -2.97410400 | 0.35828600  |
| H | 4.44030200  | 0.31712000  | -2.43417900 |
| H | 1.00942100  | -3.08146400 | 0.94849800  |
| H | 2.35860200  | -4.22613500 | 0.71240100  |
| H | 1.04118400  | -4.12359700 | -0.49665400 |
| H | 6.61427900  | -1.96328000 | -1.34539100 |
| H | 6.30411900  | -1.28618700 | 0.27352700  |
| H | 6.42028500  | -0.19988200 | -1.13840200 |
| H | 1.78124000  | -0.11312800 | -4.12797800 |
| H | 2.33142100  | 1.29685500  | -3.18297400 |
| H | 0.77137500  | 0.53968300  | -2.79561800 |
| H | 0.36584900  | -3.31857600 | -2.98883300 |
| H | -0.00483100 | -1.71270800 | -3.69020100 |
| H | -2.31971700 | -2.24316100 | -3.28189200 |

|    |             |             |             |
|----|-------------|-------------|-------------|
| H  | -1.89359600 | -3.58457500 | -2.17549000 |
| H  | -4.87215700 | -2.64069800 | 2.00213800  |
| H  | -6.00975500 | 0.20429200  | -1.04140500 |
| H  | -1.94016200 | -3.88976600 | 0.32470800  |
| H  | -2.80137800 | -3.80304600 | 1.89121200  |
| H  | -1.49542900 | -2.64807400 | 1.49969900  |
| H  | -7.76990500 | -1.12633300 | 0.56403300  |
| H  | -6.98391200 | 0.07357400  | 1.61595000  |
| H  | -7.04636000 | -1.64129900 | 2.11438600  |
| H  | -2.64598700 | 0.41254600  | -2.52312900 |
| H  | -4.31376600 | 1.06190600  | -2.55080400 |
| H  | -3.93320200 | -0.44301000 | -3.42390100 |
| H  | -4.06557600 | 0.71155900  | 2.84034800  |
| H  | -5.91456500 | 2.37037000  | 2.53410900  |
| H  | -5.85280900 | 3.92570500  | 0.56246400  |
| H  | -3.96506800 | 3.84536700  | -1.03890800 |
| H  | -2.26985800 | -0.41332300 | 2.10636700  |
| C  | -1.69838900 | 3.11974500  | -1.86383300 |
| H  | -2.48589300 | 3.05439300  | -2.63928100 |
| H  | -1.69095900 | 4.13295400  | -1.42258100 |
| H  | -0.71380900 | 2.90511900  | -2.30347700 |
| C  | 2.90669700  | 0.61266500  | 1.41227300  |
| C  | 4.27631400  | 0.61041400  | 1.75085400  |
| C  | 2.45298800  | 1.51882600  | 0.41767700  |
| C  | 5.18977800  | 1.47846300  | 1.14467400  |
| C  | 3.38603500  | 2.39488300  | -0.17710400 |
| C  | 4.73822300  | 2.38496200  | 0.17099200  |
| H  | 6.24596400  | 1.44153900  | 1.42345600  |
| H  | 5.43404100  | 3.07318400  | -0.31658200 |
| Cl | 2.84429500  | 3.53055900  | -1.42237600 |
| Cl | 4.88420400  | -0.54517500 | 2.93577700  |

### 3\_L2

E(BP86)= -3352.95044468 Hartree

|    |             |             |             |
|----|-------------|-------------|-------------|
| Ru | 0.43918500  | -0.70592800 | -0.52929100 |
| O  | 0.40623200  | 2.75852200  | -2.55828900 |
| N  | 0.16965100  | -3.44510500 | 0.28611500  |
| N  | -1.90252900 | -2.71824500 | 0.17335400  |
| C  | 1.59942100  | -3.28922400 | 0.23023800  |
| C  | 2.32798500  | -2.97883300 | 1.40113800  |
| C  | 3.69604900  | -2.68845600 | 1.26310400  |
| C  | 4.33441300  | -2.67711000 | 0.01195400  |
| C  | 3.58476600  | -3.01957400 | -1.12834000 |
| C  | 2.21770700  | -3.32347000 | -1.04488800 |

|   |             |             |             |
|---|-------------|-------------|-------------|
| C | 1.64768300  | -2.85791200 | 2.74169400  |
| C | 5.77740400  | -2.24728000 | -0.11496800 |
| C | 1.41443200  | -3.63313800 | -2.28941300 |
| C | -0.59960200 | -4.57935600 | 0.83519000  |
| C | -2.04726500 | -4.16340300 | 0.48221500  |
| C | -0.60827800 | -2.36829600 | -0.01397500 |
| C | -3.02997700 | -1.86312400 | -0.04345100 |
| C | -3.66740800 | -1.28947400 | 1.07852700  |
| C | -4.76734400 | -0.44398500 | 0.85082300  |
| C | -5.20938000 | -0.13782900 | -0.44848200 |
| C | -4.55490600 | -0.73894500 | -1.53892300 |
| C | -3.47022800 | -1.61310100 | -1.36116300 |
| C | -3.12854000 | -1.50095200 | 2.47314100  |
| C | -6.31330000 | 0.87004800  | -0.67130600 |
| C | -2.77151500 | -2.24106500 | -2.54336400 |
| C | -0.65176300 | 2.89369000  | -1.70089000 |
| C | -1.21312100 | 1.67164300  | -1.22326800 |
| C | -2.27358900 | 1.73908500  | -0.29920600 |
| C | -2.78822500 | 2.96535100  | 0.13195000  |
| C | -2.21529000 | 4.15835900  | -0.33637500 |
| C | -1.14723100 | 4.12947800  | -1.24600300 |
| C | -0.55440200 | 0.42119300  | -1.59482900 |
| H | 4.26712000  | -2.41688400 | 2.15890300  |
| H | 4.06934800  | -3.01889600 | -2.11213100 |
| H | 0.90363000  | -2.03856500 | 2.71514100  |
| H | 2.38112500  | -2.61273600 | 3.52702600  |
| H | 1.12996800  | -3.78629300 | 3.04451900  |
| H | 6.27199500  | -2.72664600 | -0.97748000 |
| H | 6.35563500  | -2.48518800 | 0.79437100  |
| H | 5.83223600  | -1.15280300 | -0.26613900 |
| H | 0.78585600  | -4.53214300 | -2.16061900 |
| H | 2.07969900  | -3.78995600 | -3.15419100 |
| H | 0.72522000  | -2.80396200 | -2.54292800 |
| H | -0.44747900 | -4.66563900 | 1.92756100  |
| H | -0.29529000 | -5.52769200 | 0.36242400  |
| H | -2.43394700 | -4.69844300 | -0.40661900 |
| H | -2.75545300 | -4.31537700 | 1.31265300  |
| H | -5.26218000 | 0.02199800  | 1.71168500  |
| H | -4.89064900 | -0.51277600 | -2.55832300 |
| H | -2.96078100 | -2.56696000 | 2.70919600  |
| H | -3.82060100 | -1.09039000 | 3.22665500  |
| H | -2.15831000 | -0.98197400 | 2.58400700  |
| H | -6.89469900 | 0.64594200  | -1.58241900 |
| H | -5.88301100 | 1.88231100  | -0.79524300 |

|    |             |             |             |
|----|-------------|-------------|-------------|
| H  | -7.00963600 | 0.90842500  | 0.18404600  |
| H  | -1.74974100 | -1.83402200 | -2.64599600 |
| H  | -3.32027400 | -2.03842300 | -3.47777500 |
| H  | -2.67547900 | -3.33658800 | -2.43296500 |
| H  | -2.66750200 | 0.80345400  | 0.09344900  |
| H  | -3.60454800 | 2.98756300  | 0.86066300  |
| H  | -2.58809900 | 5.12588600  | 0.01780600  |
| H  | -0.69653100 | 5.06571600  | -1.58415600 |
| H  | -0.27925000 | 0.32345000  | -2.67228000 |
| C  | 1.15068800  | 3.93548800  | -2.87391300 |
| H  | 0.55399800  | 4.64420100  | -3.48187000 |
| H  | 1.50060400  | 4.43589200  | -1.95275700 |
| H  | 2.01982200  | 3.58917700  | -3.45037300 |
| C  | 1.97604000  | 1.88145600  | 0.45581200  |
| C  | 2.64235300  | 3.12116600  | 0.35689200  |
| C  | 2.22339400  | 4.25179200  | 1.07049100  |
| C  | 1.12956700  | 4.15059900  | 1.94283700  |
| C  | 0.47984000  | 2.92080500  | 2.08683800  |
| C  | 0.87533400  | 1.78040100  | 1.35673900  |
| H  | 2.74842300  | 5.20232000  | 0.94247700  |
| H  | 0.78011900  | 5.02082200  | 2.50463900  |
| S  | 0.00406100  | 0.24508500  | 1.50474000  |
| S  | 2.44825900  | 0.47639700  | -0.52121900 |
| Cl | -0.87193200 | 2.80586500  | 3.21305600  |
| Cl | 4.04330900  | 3.27951300  | -0.70725900 |

TS2\_L2

E(BP86)= -3352.93216678 Hartree

|    |             |             |             |
|----|-------------|-------------|-------------|
| Ru | -1.05806300 | -0.21631500 | -0.57304500 |
| O  | 2.99912200  | -0.08335900 | -2.76983300 |
| N  | -3.33079200 | 1.44691000  | -0.01096100 |
| N  | -1.56655500 | 2.75762600  | 0.14811600  |
| C  | -3.94409500 | 0.19176600  | -0.31218000 |
| C  | -4.79123300 | -0.43125700 | 0.62806800  |
| C  | -5.18596200 | -1.75941400 | 0.39482500  |
| C  | -4.72208700 | -2.49257200 | -0.71599800 |
| C  | -3.88676500 | -1.85147100 | -1.64164200 |
| C  | -3.47882100 | -0.50797900 | -1.47200300 |
| C  | -5.19479100 | 0.28723000  | 1.89394100  |
| C  | -5.08619800 | -3.95078700 | -0.88365000 |
| C  | -2.71628900 | 0.19676800  | -2.57704200 |
| C  | -3.93558400 | 2.78901800  | 0.06423400  |
| C  | -2.70576400 | 3.65896400  | 0.43676600  |
| C  | -1.95869600 | 1.47491200  | -0.06063400 |

|   |             |             |             |
|---|-------------|-------------|-------------|
| C | -0.19657100 | 3.17213800  | 0.20715800  |
| C | 0.46574400  | 3.21290500  | 1.45166500  |
| C | 1.81686300  | 3.59927900  | 1.46465200  |
| C | 2.51587100  | 3.90219900  | 0.28327200  |
| C | 1.81990000  | 3.85327200  | -0.93684200 |
| C | 0.46370100  | 3.49578000  | -0.99769500 |
| C | -0.21685200 | 2.74384500  | 2.71381400  |
| C | 3.99813400  | 4.19003700  | 0.31739700  |
| C | -0.26378700 | 3.41846200  | -2.31866800 |
| C | 3.22585300  | 0.16136300  | -1.44350900 |
| C | 2.05620700  | 0.31630000  | -0.62967700 |
| C | 2.24622300  | 0.54296400  | 0.74875700  |
| C | 3.52184800  | 0.60996900  | 1.32027500  |
| C | 4.64963600  | 0.43969900  | 0.50708100  |
| C | 4.50853000  | 0.22064600  | -0.87480100 |
| C | 0.74136400  | 0.13807000  | -1.24185800 |
| H | -5.83550200 | -2.25187100 | 1.12873400  |
| H | -3.52946800 | -2.40017900 | -2.52101300 |
| H | -4.31827400 | 0.77292000  | 2.36007300  |
| H | -5.62582900 | -0.41723200 | 2.62384100  |
| H | -5.95077700 | 1.07460100  | 1.70803300  |
| H | -5.03951400 | -4.26139300 | -1.94161400 |
| H | -6.10187900 | -4.16203300 | -0.50590400 |
| H | -4.38459500 | -4.59542400 | -0.32091200 |
| H | -3.08429100 | 1.22527500  | -2.73847500 |
| H | -2.79100500 | -0.37192200 | -3.51857500 |
| H | -1.59297700 | 0.34076600  | -2.43372700 |
| H | -4.73215500 | 2.83851400  | 0.82441100  |
| H | -4.36972600 | 3.07367200  | -0.91424800 |
| H | -2.63425000 | 4.58087000  | -0.16425200 |
| H | -2.71008700 | 3.94390600  | 1.50609300  |
| H | 2.35082200  | 3.61565300  | 2.42263100  |
| H | 2.35126300  | 4.08168300  | -1.86902000 |
| H | -1.19739900 | 3.22629300  | 2.87612200  |
| H | 0.41022800  | 2.94662000  | 3.59773400  |
| H | -0.39359400 | 1.65076000  | 2.66590700  |
| H | 4.31271400  | 4.81799700  | -0.53409200 |
| H | 4.56300000  | 3.23992700  | 0.26174200  |
| H | 4.29492600  | 4.69729100  | 1.25191500  |
| H | -0.54407200 | 2.37421100  | -2.54447400 |
| H | 0.37061200  | 3.78995900  | -3.14026600 |
| H | -1.19910600 | 4.00773500  | -2.31266300 |
| H | 1.35285000  | 0.66157400  | 1.36150700  |
| H | 3.62796400  | 0.77618700  | 2.39662600  |

|    |             |             |             |
|----|-------------|-------------|-------------|
| H  | 5.65541800  | 0.46715900  | 0.94196600  |
| H  | 5.39896000  | 0.07813000  | -1.49189400 |
| H  | 0.78952200  | 0.34747300  | -2.32712500 |
| C  | 4.11335000  | -0.48041900 | -3.56839900 |
| H  | 4.86133500  | 0.33135900  | -3.66150000 |
| H  | 4.59405400  | -1.38351300 | -3.14837600 |
| H  | 3.69907500  | -0.71016300 | -4.56110400 |
| C  | 1.24772100  | -2.45853400 | 0.16101300  |
| C  | 0.80143300  | -1.95707400 | 1.42384500  |
| S  | -0.59062500 | -0.86029900 | 1.56393300  |
| S  | 0.37187400  | -2.10519200 | -1.33620600 |
| C  | 2.46161100  | -3.18111900 | 0.11257300  |
| C  | 1.56469400  | -2.27449500 | 2.57218800  |
| C  | 3.20327800  | -3.47455900 | 1.26217200  |
| H  | 4.13737800  | -4.03587200 | 1.18099900  |
| C  | 2.74180400  | -3.02512000 | 2.50586600  |
| H  | 3.30637500  | -3.23284800 | 3.41887200  |
| Cl | 1.06891700  | -1.65557300 | 4.14790100  |
| Cl | 3.10870900  | -3.73042500 | -1.43488900 |

#### 4\_L2

E(BP86)= -3352.93571774 Hartree

|    |             |             |             |
|----|-------------|-------------|-------------|
| Ru | -1.10147200 | -0.25221200 | -0.55816100 |
| O  | 3.03907500  | -0.19622700 | -2.83825700 |
| N  | -3.24201500 | 1.58272700  | -0.06188200 |
| N  | -1.39152800 | 2.75348300  | 0.16940500  |
| C  | -3.95427900 | 0.38217200  | -0.36622500 |
| C  | -4.88810000 | -0.14509700 | 0.55107400  |
| C  | -5.42158100 | -1.42143800 | 0.30443600  |
| C  | -5.01201700 | -2.20145600 | -0.79618500 |
| C  | -4.08048300 | -1.65948100 | -1.69274300 |
| C  | -3.53343100 | -0.36770800 | -1.51102900 |
| C  | -5.24438200 | 0.61323100  | 1.80802300  |
| C  | -5.54103700 | -3.60621200 | -0.98318200 |
| C  | -2.67702900 | 0.25062600  | -2.59663000 |
| C  | -3.74798900 | 2.96517300  | -0.00324600 |
| C  | -2.46985500 | 3.74104200  | 0.40670900  |
| C  | -1.86798700 | 1.50332200  | -0.06677100 |
| C  | -0.00589800 | 3.10190600  | 0.27188500  |
| C  | 0.59909200  | 3.17581400  | 1.54371900  |
| C  | 1.94507100  | 3.57524000  | 1.60964000  |
| C  | 2.69579900  | 3.85299900  | 0.45449400  |
| C  | 2.06428400  | 3.74159600  | -0.79645400 |
| C  | 0.71432400  | 3.37627700  | -0.91046900 |



|   |             |             |             |
|---|-------------|-------------|-------------|
| C | -0.14329600 | 2.73941200  | 2.78407800  |
| C | 4.16402800  | 4.19577600  | 0.54563000  |
| C | 0.04716700  | 3.25747100  | -2.25935800 |
| C | 3.26671400  | 0.10511200  | -1.51695700 |
| C | 2.10228100  | 0.19377200  | -0.69762300 |
| C | 2.28114100  | 0.47637000  | 0.66481300  |
| C | 3.55601800  | 0.64802700  | 1.22239100  |
| C | 4.68713600  | 0.54498800  | 0.40482000  |
| C | 4.54805000  | 0.28498800  | -0.97046900 |
| C | 0.78429100  | -0.12634300 | -1.30596900 |
| H | -6.14237800 | -1.83745600 | 1.01896000  |
| H | -3.76192300 | -2.24472800 | -2.56356200 |
| H | -4.33468900 | 1.01946700  | 2.28633700  |
| H | -5.74898100 | -0.04586100 | 2.53334700  |
| H | -5.92348100 | 1.46521800  | 1.60951400  |
| H | -5.42879100 | -3.94551800 | -2.02719000 |
| H | -6.60900800 | -3.67754000 | -0.71104200 |
| H | -4.99175100 | -4.32242600 | -0.34291700 |
| H | -3.01654100 | 1.27183600  | -2.85066800 |
| H | -2.68734500 | -0.37481100 | -3.50316800 |
| H | -1.56650500 | 0.42495000  | -2.37328400 |
| H | -4.56115800 | 3.07451600  | 0.73282100  |
| H | -4.13203600 | 3.28060300  | -0.99328800 |
| H | -2.30377200 | 4.64680300  | -0.20035800 |
| H | -2.49086600 | 4.04017400  | 1.47188700  |
| H | 2.43121400  | 3.63141400  | 2.59145900  |
| H | 2.63990700  | 3.93924500  | -1.70913500 |
| H | -1.11200100 | 3.25609000  | 2.90955800  |
| H | 0.45875800  | 2.92751100  | 3.68846900  |
| H | -0.35647700 | 1.65355400  | 2.73503100  |
| H | 4.45907200  | 4.93457300  | -0.22030000 |
| H | 4.77242100  | 3.28598800  | 0.38403600  |
| H | 4.42660000  | 4.60162400  | 1.53776200  |
| H | -0.28902200 | 2.21959800  | -2.42916900 |
| H | 0.74142000  | 3.53579100  | -3.06924100 |
| H | -0.84827600 | 3.90212200  | -2.33672700 |
| H | 1.38627000  | 0.55543300  | 1.28344000  |
| H | 3.65731600  | 0.85742100  | 2.29181900  |
| H | 5.69173100  | 0.66017300  | 0.82814700  |
| H | 5.43947300  | 0.20148100  | -1.59741600 |
| H | 0.79255400  | 0.16525300  | -2.37270100 |
| C | 4.17566600  | -0.46868600 | -3.65333000 |
| H | 4.82613700  | 0.42177000  | -3.76238600 |
| H | 4.76862400  | -1.30714600 | -3.24074800 |

|    |             |             |             |
|----|-------------|-------------|-------------|
| H  | 3.77554500  | -0.75040100 | -4.63879300 |
| C  | 1.21383400  | -2.50206400 | 0.18302900  |
| C  | 0.71690600  | -2.04624300 | 1.44023900  |
| S  | -0.61929000 | -0.89124900 | 1.57575000  |
| S  | 0.42595300  | -2.01687300 | -1.34896800 |
| C  | 2.38247100  | -3.28839100 | 0.13712300  |
| C  | 1.40167400  | -2.47823300 | 2.60418300  |
| C  | 3.04402600  | -3.69364400 | 1.30256800  |
| H  | 3.94809600  | -4.30340800 | 1.23639700  |
| C  | 2.53615600  | -3.29085200 | 2.54471200  |
| H  | 3.03476100  | -3.59029300 | 3.47089500  |
| Cl | 0.84358200  | -1.94840400 | 4.18824800  |
| Cl | 3.08011800  | -3.77548900 | -1.40738900 |

Cat.\_L3

E(BP86)= -2505.4749157 Hartree

|    |             |             |             |
|----|-------------|-------------|-------------|
| Ru | -0.18236200 | -0.40239900 | 0.37089700  |
| S  | -1.20921000 | 0.94892400  | 1.98449700  |
| S  | -1.90929500 | -2.06043300 | 0.56350500  |
| O  | 1.00620700  | -1.86901100 | -0.94816200 |
| O  | -4.74289000 | 1.21826200  | 3.11135200  |
| O  | -5.42732800 | -1.76442900 | 1.72278000  |
| N  | -0.74203800 | 1.85530900  | -1.36680300 |
| N  | 1.40466500  | 1.94604500  | -0.86390700 |
| C  | -1.99271900 | 1.17000500  | -1.56967400 |
| C  | -3.13273100 | 1.54843200  | -0.82382700 |
| C  | -4.27298200 | 0.73210200  | -0.91489400 |
| C  | -4.31231700 | -0.40998900 | -1.73448800 |
| C  | -3.19762100 | -0.68533600 | -2.54850100 |
| C  | -2.03125800 | 0.09038600  | -2.48755100 |
| C  | -3.16109800 | 2.80160100  | 0.01782600  |
| C  | -5.51555700 | -1.32231100 | -1.71455800 |
| C  | -0.84999100 | -0.21325100 | -3.38207400 |
| C  | -0.25269200 | 2.97101800  | -2.20153600 |
| C  | 1.17555200  | 3.18276500  | -1.64933800 |
| C  | 0.26116800  | 1.23892600  | -0.67739500 |
| C  | 2.68656500  | 1.62640100  | -0.31506100 |
| C  | 3.02996000  | 2.07961300  | 0.97507000  |
| C  | 4.29996000  | 1.73600500  | 1.47404200  |
| C  | 5.21133700  | 0.97398500  | 0.72348700  |
| C  | 4.83234700  | 0.54630000  | -0.56296500 |
| C  | 3.57578900  | 0.85799000  | -1.09972700 |
| C  | 2.05331100  | 2.88095700  | 1.80100900  |
| C  | 6.56237800  | 0.59461000  | 1.28454500  |

|   |             |             |             |
|---|-------------|-------------|-------------|
| C | 3.16426900  | 0.35793900  | -2.46445200 |
| C | 2.22013300  | -2.16232600 | -0.33171800 |
| C | 2.41452700  | -1.48977200 | 0.90180800  |
| C | 3.61973300  | -1.73375700 | 1.59966400  |
| C | 4.58857200  | -2.59894100 | 1.07600100  |
| C | 4.36786100  | -3.23946000 | -0.15506900 |
| C | 3.17068800  | -3.03302200 | -0.86681000 |
| C | 1.36188600  | -0.61524800 | 1.38284200  |
| C | -2.68697800 | 0.09177200  | 2.15149900  |
| C | -2.97716800 | -1.14975400 | 1.56294700  |
| C | -4.42646300 | -1.09969000 | 1.94773300  |
| C | -4.10596800 | 0.30739100  | 2.60628300  |
| H | -5.14611500 | 0.98143200  | -0.30005200 |
| H | -3.22999900 | -1.54458000 | -3.22974700 |
| H | -2.14754600 | 3.12562300  | 0.29690300  |
| H | -3.73300700 | 2.64408300  | 0.94713100  |
| H | -3.65307200 | 3.62144700  | -0.54185600 |
| H | -5.45439200 | -2.09208300 | -2.50231500 |
| H | -6.45402600 | -0.75603800 | -1.85434700 |
| H | -5.58754200 | -1.82980100 | -0.73465400 |
| H | -0.67845300 | 0.59455200  | -4.11864800 |
| H | -1.02137500 | -1.14115800 | -3.95258300 |
| H | 0.08359200  | -0.32917700 | -2.80456600 |
| H | -0.89741900 | 3.85681800  | -2.08031700 |
| H | -0.25048900 | 2.68081700  | -3.26967000 |
| H | 1.93660700  | 3.28458100  | -2.44085400 |
| H | 1.24312700  | 4.06637800  | -0.98722900 |
| H | 4.58105400  | 2.07343000  | 2.47926200  |
| H | 5.52294200  | -0.06913600 | -1.15150900 |
| H | 1.71764900  | 3.79293500  | 1.27459800  |
| H | 2.50795800  | 3.19244500  | 2.75560800  |
| H | 1.14563700  | 2.29450500  | 2.03001800  |
| H | 7.38482700  | 0.96824000  | 0.64735900  |
| H | 6.66791400  | -0.50485500 | 1.33698800  |
| H | 6.70956800  | 0.99973500  | 2.29976800  |
| H | 2.26737900  | -0.28121000 | -2.39348300 |
| H | 3.97297700  | -0.23455300 | -2.92264600 |
| H | 2.91628600  | 1.18618900  | -3.15397200 |
| H | 3.77901900  | -1.22872800 | 2.55785700  |
| H | 5.51329000  | -2.78599000 | 1.63170000  |
| H | 5.12281100  | -3.91758900 | -0.56626100 |
| H | 2.99776300  | -3.54466800 | -1.81749100 |
| H | 1.48356300  | -0.20508400 | 2.39985500  |
| C | 0.40987600  | -2.90920100 | -1.76056000 |

|   |             |             |             |
|---|-------------|-------------|-------------|
| H | 0.94389900  | -2.99158400 | -2.72267000 |
| H | 0.43593500  | -3.86669600 | -1.21497200 |
| H | -0.62889100 | -2.59550300 | -1.92483300 |

TS1\_L2

E(BP86)= -2505.43511213 Hartree

|    |             |             |             |
|----|-------------|-------------|-------------|
| Ru | 0.18906300  | -0.26302000 | -0.60724300 |
| O  | -1.44495400 | -1.38956800 | 1.67503300  |
| N  | 0.71858700  | 2.36951100  | 0.71789200  |
| N  | -1.45933500 | 2.13970900  | 0.49382400  |
| C  | 2.10345100  | 1.98570000  | 0.70592900  |
| C  | 2.86414500  | 2.25693800  | -0.45103700 |
| C  | 4.16844700  | 1.74079300  | -0.51680200 |
| C  | 4.71791000  | 0.97653800  | 0.52912500  |
| C  | 3.93836300  | 0.75949100  | 1.68071600  |
| C  | 2.63026700  | 1.25515000  | 1.79312500  |
| C  | 2.26457100  | 3.01127800  | -1.61274600 |
| C  | 6.10957800  | 0.39582800  | 0.41884600  |
| C  | 1.78839900  | 0.96612500  | 3.01224800  |
| C  | 0.18786300  | 3.56563100  | 1.40755600  |
| C  | -1.30890000 | 3.51725200  | 1.02934200  |
| C  | -0.25821800 | 1.54237800  | 0.27060500  |
| C  | -2.71349200 | 1.67345700  | -0.01808300 |
| C  | -2.96237200 | 1.75254500  | -1.40637500 |
| C  | -4.17664300 | 1.23637500  | -1.88838900 |
| C  | -5.13140100 | 0.66114100  | -1.03075100 |
| C  | -4.85889200 | 0.62737300  | 0.34785300  |
| C  | -3.66055100 | 1.13162900  | 0.87673400  |
| C  | -1.93279100 | 2.32830800  | -2.34806500 |
| C  | -6.41106900 | 0.06586000  | -1.57088100 |
| C  | -3.38471700 | 1.07702900  | 2.35962900  |
| C  | -2.48384000 | -1.94632300 | 0.98591000  |
| C  | -2.45508900 | -1.77470300 | -0.43519800 |
| C  | -3.53156800 | -2.32122400 | -1.18122000 |
| C  | -4.58790900 | -3.00126400 | -0.56811900 |
| C  | -4.59344400 | -3.14991600 | 0.82827500  |
| C  | -3.54624700 | -2.62439600 | 1.60432200  |
| C  | -1.45071700 | -0.99412000 | -1.11068000 |
| H  | 4.75802300  | 1.90686400  | -1.42601400 |
| H  | 4.34398500  | 0.14468500  | 2.49265900  |
| H  | 1.55935700  | 2.36549700  | -2.16775100 |
| H  | 3.04860200  | 3.33290200  | -2.31760500 |
| H  | 1.70406200  | 3.90408800  | -1.28290400 |
| H  | 6.86724900  | 1.10219500  | 0.80946300  |

|   |             |             |             |
|---|-------------|-------------|-------------|
| H | 6.36669600  | 0.16982100  | -0.62905700 |
| H | 6.19556400  | -0.54211400 | 0.99227200  |
| H | 1.71235600  | 1.84785900  | 3.67817600  |
| H | 2.22459500  | 0.14112300  | 3.59813100  |
| H | 0.76408100  | 0.67479700  | 2.72066600  |
| H | 0.69821700  | 4.47670100  | 1.05407500  |
| H | 0.35020900  | 3.47518200  | 2.49822100  |
| H | -1.97988200 | 3.67395000  | 1.88954600  |
| H | -1.57268300 | 4.25108200  | 0.24406900  |
| H | -4.37694700 | 1.27523000  | -2.96630200 |
| H | -5.58350500 | 0.16464300  | 1.02827900  |
| H | -1.56574500 | 3.31486600  | -2.01255400 |
| H | -2.34609700 | 2.44278200  | -3.36365000 |
| H | -1.04311600 | 1.66999000  | -2.41282300 |
| H | -7.30164100 | 0.52333100  | -1.10257400 |
| H | -6.44854000 | -1.01797300 | -1.35714100 |
| H | -6.49276700 | 0.20164200  | -2.66242600 |
| H | -2.31170900 | 0.91709000  | 2.55128000  |
| H | -3.95295500 | 0.25579600  | 2.82767800  |
| H | -3.68466100 | 2.01507600  | 2.86581400  |
| H | -3.51815000 | -2.18798600 | -2.26858000 |
| H | -5.39546900 | -3.42460600 | -1.17432800 |
| H | -5.40952000 | -3.68622700 | 1.32433800  |
| H | -3.56315800 | -2.75025400 | 2.69000600  |
| H | -1.62161800 | -0.84597200 | -2.19691800 |
| C | -1.28809800 | -1.73315700 | 3.05416500  |
| H | -2.10595700 | -1.31690700 | 3.67244600  |
| H | -1.24270300 | -2.82970800 | 3.18136900  |
| H | -0.32958200 | -1.28865800 | 3.35715300  |
| S | 1.35916400  | -1.65683500 | 0.79947000  |
| S | 1.82650400  | -0.55191200 | -2.19875000 |
| C | 4.42794700  | -2.00106700 | -1.44118700 |
| O | 5.37052900  | -1.90340500 | -2.20753900 |
| C | 4.19727600  | -2.52472500 | 0.04787100  |
| O | 4.88429500  | -2.99845300 | 0.93643400  |
| C | 2.99423600  | -1.55376100 | -1.39938700 |
| C | 2.78854500  | -2.01500900 | -0.09687000 |

2\_L2

E(BP86)= -2505.44840356 Hartree

|    |             |             |             |
|----|-------------|-------------|-------------|
| Ru | 0.21455600  | -0.16884600 | -0.77649600 |
| S  | 1.97404400  | -1.22060300 | -2.08619000 |
| S  | 0.77849800  | -1.35000800 | 1.12268900  |
| O  | -2.04856000 | -2.17469200 | 0.95746600  |

|   |             |             |             |
|---|-------------|-------------|-------------|
| N | 1.16195800  | 2.11975000  | 0.73777000  |
| N | -1.04392800 | 2.24089400  | 0.63227400  |
| C | 2.49077700  | 1.74519000  | 0.33048600  |
| C | 2.91165800  | 2.03818100  | -0.98942300 |
| C | 4.19567400  | 1.63155000  | -1.37924700 |
| C | 5.05968200  | 0.95194700  | -0.50137000 |
| C | 4.62321500  | 0.71729600  | 0.81446700  |
| C | 3.34844300  | 1.10982200  | 1.25785000  |
| C | 1.99214300  | 2.70479900  | -1.98385500 |
| C | 6.40218700  | 0.44526700  | -0.97274000 |
| C | 2.93476400  | 0.85180400  | 2.68725900  |
| C | 0.87036900  | 3.43362700  | 1.34620200  |
| C | -0.66990700 | 3.41217900  | 1.46027600  |
| C | 0.04260800  | 1.49513700  | 0.27591800  |
| C | -2.40549300 | 1.80249200  | 0.56318900  |
| C | -3.20520100 | 2.24717800  | -0.51083600 |
| C | -4.54007000 | 1.81383700  | -0.56681100 |
| C | -5.08227400 | 0.96315800  | 0.41300300  |
| C | -4.25607800 | 0.55331600  | 1.47596700  |
| C | -2.91723500 | 0.96092600  | 1.57677600  |
| C | -2.62203700 | 3.14345600  | -1.57833900 |
| C | -6.50486700 | 0.46622600  | 0.31216200  |
| C | -2.04338100 | 0.50323500  | 2.71800100  |
| C | -3.00151300 | -2.11180400 | -0.00120400 |
| C | -2.74442700 | -1.20992800 | -1.08229200 |
| C | -3.74143100 | -1.08759600 | -2.08547500 |
| C | -4.91896600 | -1.83766900 | -2.06065300 |
| C | -5.13768500 | -2.73044700 | -0.99764300 |
| C | -4.19298100 | -2.86058100 | 0.03139100  |
| C | -1.56405100 | -0.39041700 | -1.19609300 |
| H | 4.52249300  | 1.82728900  | -2.40750700 |
| H | 5.28049400  | 0.18588700  | 1.51290700  |
| H | 1.29184000  | 1.95905800  | -2.41331300 |
| H | 2.56636200  | 3.14087400  | -2.81812000 |
| H | 1.37651300  | 3.50118900  | -1.53065900 |
| H | 7.16795900  | 0.53084700  | -0.18217700 |
| H | 6.75343800  | 0.99683000  | -1.86153600 |
| H | 6.32432900  | -0.62457100 | -1.24127300 |
| H | 3.41270500  | 1.58009000  | 3.37093700  |
| H | 3.24985100  | -0.15738000 | 3.00423300  |
| H | 1.84324500  | 0.92067400  | 2.81039000  |
| H | 1.23476400  | 4.24315600  | 0.68515000  |
| H | 1.37666200  | 3.52819200  | 2.32135400  |
| H | -1.01325500 | 3.26189800  | 2.50053800  |

|   |             |             |             |
|---|-------------|-------------|-------------|
| H | -1.14510800 | 4.32847600  | 1.07083800  |
| H | -5.17084700 | 2.14197700  | -1.40194600 |
| H | -4.66505400 | -0.11131600 | 2.24695500  |
| H | -2.33712000 | 4.13281900  | -1.17384800 |
| H | -3.34714200 | 3.31124800  | -2.39178700 |
| H | -1.70577800 | 2.70615000  | -2.01495500 |
| H | -6.98246000 | 0.40004300  | 1.30544600  |
| H | -6.52284800 | -0.54560500 | -0.13327200 |
| H | -7.12105600 | 1.12345200  | -0.32476400 |
| H | -1.11627700 | 0.03413500  | 2.34902800  |
| H | -2.57299500 | -0.23411200 | 3.34286100  |
| H | -1.74924900 | 1.34298300  | 3.37601500  |
| H | -3.55669200 | -0.38228100 | -2.90367000 |
| H | -5.66016300 | -1.72958700 | -2.85852600 |
| H | -6.05326700 | -3.33105400 | -0.96059500 |
| H | -4.38626800 | -3.55032400 | 0.85638800  |
| H | -1.65568500 | 0.36482500  | -2.03236500 |
| C | -2.22219300 | -3.09071500 | 2.03878600  |
| H | -3.11175000 | -2.83141000 | 2.64487500  |
| H | -2.31284600 | -4.12993200 | 1.67229900  |
| H | -1.31082900 | -2.99233400 | 2.64525000  |
| C | 2.76747200  | -1.91504800 | -0.72706500 |
| C | 2.29399600  | -1.94940900 | 0.59942400  |
| C | 4.11496200  | -2.46178400 | -0.34654000 |
| O | 5.17120700  | -2.69826500 | -0.90873500 |
| C | 3.59408300  | -2.45953700 | 1.15417200  |
| O | 4.07176200  | -2.65476700 | 2.26025800  |

### 3\_L2

E(BP86)= -2505.43281827 Hartree

|    |             |             |             |
|----|-------------|-------------|-------------|
| Ru | 0.57165500  | -0.09402000 | -0.50919800 |
| O  | -1.58830300 | 2.58925300  | -2.35150800 |
| N  | 1.91797000  | -2.55591400 | 0.10554800  |
| N  | -0.23560600 | -3.02057000 | 0.18453700  |
| C  | 3.03800800  | -1.65638300 | 0.04345100  |
| C  | 3.56233200  | -1.09921600 | 1.23247500  |
| C  | 4.54302100  | -0.10119900 | 1.11309800  |
| C  | 4.99788200  | 0.35059400  | -0.13811800 |
| C  | 4.47514500  | -0.24648100 | -1.29847500 |
| C  | 3.48760700  | -1.24167600 | -1.23432500 |
| C  | 3.06865800  | -1.53894600 | 2.58959300  |
| C  | 5.98418600  | 1.49117400  | -0.23702800 |
| C  | 2.87792600  | -1.80254700 | -2.49992200 |
| C  | 1.89981600  | -3.95114100 | 0.58550000  |

|   |             |             |             |
|---|-------------|-------------|-------------|
| C | 0.42453100  | -4.34171200 | 0.32599500  |
| C | 0.66701700  | -2.03066900 | -0.03071600 |
| C | -1.65323200 | -2.85673800 | 0.07876800  |
| C | -2.40250700 | -2.71452100 | 1.26571100  |
| C | -3.78599300 | -2.49704300 | 1.15028700  |
| C | -4.41346300 | -2.37437500 | -0.10260700 |
| C | -3.63451600 | -2.53946400 | -1.26202300 |
| C | -2.25468700 | -2.79526900 | -1.19678300 |
| C | -1.71987100 | -2.70398700 | 2.61300400  |
| C | -5.87592900 | -2.00555000 | -0.19724900 |
| C | -1.43792100 | -2.99740600 | -2.45174300 |
| C | -2.29985100 | 2.37600600  | -1.20443300 |
| C | -2.13180100 | 1.09070300  | -0.60856200 |
| C | -2.83244000 | 0.80162200  | 0.57902600  |
| C | -3.67715400 | 1.74680600  | 1.16963000  |
| C | -3.79845300 | 3.02315700  | 0.59571100  |
| C | -3.11192900 | 3.34355900  | -0.58432000 |
| C | -1.11289500 | 0.20880500  | -1.17840900 |
| H | 4.93846900  | 0.35922400  | 2.02633100  |
| H | 4.81796000  | 0.09702000  | -2.28182200 |
| H | 1.97444200  | -1.67798500 | 2.59362900  |
| H | 3.30755200  | -0.78206100 | 3.35369500  |
| H | 3.53674400  | -2.49212000 | 2.90408600  |
| H | 6.64342700  | 1.38399900  | -1.11584900 |
| H | 6.61584600  | 1.56347700  | 0.66465900  |
| H | 5.44572300  | 2.45154300  | -0.34406800 |
| H | 2.63159400  | -2.87337600 | -2.40232900 |
| H | 3.55829000  | -1.66876500 | -3.35729400 |
| H | 1.93236200  | -1.27770000 | -2.74894000 |
| H | 2.15943100  | -3.99954100 | 1.66013300  |
| H | 2.61540300  | -4.57196500 | 0.02198100  |
| H | 0.30413400  | -4.92379300 | -0.60802700 |
| H | -0.02415400 | -4.91419000 | 1.15367200  |
| H | -4.37993100 | -2.36913300 | 2.06359400  |
| H | -4.11129400 | -2.45610900 | -2.24627400 |
| H | -1.06060300 | -3.57818800 | 2.76107700  |
| H | -2.46100800 | -2.69565700 | 3.42895800  |
| H | -1.09134800 | -1.79952900 | 2.71647000  |
| H | -6.32253400 | -2.34376900 | -1.14776000 |
| H | -5.99286300 | -0.90616400 | -0.14765300 |
| H | -6.46013600 | -2.43661600 | 0.63415000  |
| H | -0.52702600 | -2.37383100 | -2.44554100 |
| H | -2.02513800 | -2.73949900 | -3.34841600 |
| H | -1.11206900 | -4.04970200 | -2.55807800 |



|   |             |             |             |
|---|-------------|-------------|-------------|
| H | -2.67902100 | -0.17478300 | 1.03919600  |
| H | -4.20552800 | 1.50385400  | 2.09688200  |
| H | -4.41976100 | 3.78639700  | 1.07607300  |
| H | -3.19593900 | 4.34680900  | -1.00936500 |
| H | -1.19801200 | -0.02864500 | -2.26514800 |
| C | -1.33145000 | 3.95129800  | -2.72252700 |
| H | -2.25212700 | 4.45738600  | -3.07243800 |
| H | -0.88583300 | 4.50945900  | -1.87907000 |
| H | -0.60845200 | 3.89606300  | -3.54886200 |
| C | 0.77835500  | 2.82410500  | 0.34170100  |
| C | 0.28794400  | 2.18108900  | 1.49500700  |
| S | 0.21971400  | 0.48260800  | 1.71066100  |
| S | 1.50592800  | 2.09301700  | -1.04111500 |
| C | -0.18775100 | 3.46640100  | 2.13060800  |
| O | -0.74863900 | 3.80108000  | 3.15677600  |
| C | 0.32732900  | 4.17772800  | 0.80260600  |
| O | 0.26747700  | 5.29814300  | 0.32025300  |

TS2\_L3

E(BP86)= -2505.41488022 Hartree

|    |             |             |             |
|----|-------------|-------------|-------------|
| Ru | -0.92276100 | -0.25646600 | -0.51109200 |
| O  | 2.92549200  | -2.13188600 | -2.18891600 |
| N  | -2.82916100 | 1.79453600  | -0.22014700 |
| N  | -0.89558400 | 2.84644300  | -0.10878500 |
| C  | -3.58726700 | 0.57786900  | -0.21646000 |
| C  | -4.35270800 | 0.18214300  | 0.90430400  |
| C  | -4.91969200 | -1.10233300 | 0.90342100  |
| C  | -4.69453500 | -2.02333900 | -0.14011100 |
| C  | -3.91191600 | -1.61999300 | -1.22936600 |
| C  | -3.34452900 | -0.32603700 | -1.30177700 |
| C  | -4.47715200 | 1.06988000  | 2.12018300  |
| C  | -5.24270700 | -3.43002300 | -0.05613300 |
| C  | -2.59690000 | 0.10902800  | -2.54710700 |
| C  | -3.24665300 | 3.19012900  | 0.00114700  |
| C  | -1.89525500 | 3.94022900  | -0.14822900 |
| C  | -1.46619100 | 1.62436100  | -0.23796600 |
| C  | 0.51448200  | 3.08900600  | -0.06705800 |
| C  | 1.11698700  | 3.33801000  | 1.18501600  |
| C  | 2.50542100  | 3.55216400  | 1.21757500  |
| C  | 3.29155700  | 3.48523200  | 0.05352600  |
| C  | 2.65183100  | 3.24310300  | -1.17513700 |
| C  | 1.26419500  | 3.04988300  | -1.26157900 |
| C  | 0.30650400  | 3.27848100  | 2.45857700  |
| C  | 4.79629300  | 3.59319100  | 0.12895000  |

|   |             |             |             |
|---|-------------|-------------|-------------|
| C | 0.59361000  | 2.76874100  | -2.58456900 |
| C | 3.24789800  | -1.39804300 | -1.08323800 |
| C | 2.22239400  | -0.53837800 | -0.58135900 |
| C | 2.51570300  | 0.24330200  | 0.55180700  |
| C | 3.76363800  | 0.18871700  | 1.18261400  |
| C | 4.74190100  | -0.69368500 | 0.70106800  |
| C | 4.48666400  | -1.49109500 | -0.42468500 |
| C | 0.89250700  | -0.52277400 | -1.21878600 |
| H | -5.50893800 | -1.41432500 | 1.77420100  |
| H | -3.72027400 | -2.32114600 | -2.04968600 |
| H | -3.48209600 | 1.43155100  | 2.43835900  |
| H | -4.91624600 | 0.51175600  | 2.96281900  |
| H | -5.11627300 | 1.95519100  | 1.94059200  |
| H | -5.29755800 | -3.90340700 | -1.05110500 |
| H | -6.25215900 | -3.44619900 | 0.39084000  |
| H | -4.59341600 | -4.06484000 | 0.57593700  |
| H | -2.83843900 | 1.14907400  | -2.82672200 |
| H | -2.81564800 | -0.56845600 | -3.38846400 |
| H | -1.45869700 | 0.11085100  | -2.47640900 |
| H | -3.68183800 | 3.32589300  | 1.00717500  |
| H | -3.99388400 | 3.50654100  | -0.74642000 |
| H | -1.81936600 | 4.48033500  | -1.11113500 |
| H | -1.71637200 | 4.66296100  | 0.66492900  |
| H | 2.99076700  | 3.73052800  | 2.18495600  |
| H | 3.25258300  | 3.18495000  | -2.09093000 |
| H | -0.53857400 | 3.99152600  | 2.45991800  |
| H | 0.93667700  | 3.50423000  | 3.33429200  |
| H | -0.11719700 | 2.26624700  | 2.59641400  |
| H | 5.22100800  | 4.03989300  | -0.78661900 |
| H | 5.23754000  | 2.58430900  | 0.24224700  |
| H | 5.12024600  | 4.19763300  | 0.99359200  |
| H | 0.17104900  | 1.74808200  | -2.58676000 |
| H | 1.31202200  | 2.85015000  | -3.41654400 |
| H | -0.24087000 | 3.46670400  | -2.78243100 |
| H | 1.73149100  | 0.89487100  | 0.93289400  |
| H | 3.95391700  | 0.80877300  | 2.06411900  |
| H | 5.70928900  | -0.77848300 | 1.20841300  |
| H | 5.24939800  | -2.18710800 | -0.78255600 |
| H | 0.97117800  | -0.49205600 | -2.32405800 |
| C | 3.62561500  | -3.37009200 | -2.38129200 |
| H | 4.68141000  | -3.20478700 | -2.67044800 |
| H | 3.56700700  | -3.98619000 | -1.46570700 |
| H | 3.10153100  | -3.87580600 | -3.20571900 |
| C | 0.68091700  | -2.82099100 | 0.53090100  |

|   |             |             |             |
|---|-------------|-------------|-------------|
| C | 0.48859900  | -2.00098600 | 1.65656800  |
| S | -0.37819500 | -0.52583600 | 1.73069600  |
| S | 0.04805100  | -2.56195300 | -1.06334700 |
| C | 1.45423900  | -2.82454800 | 2.50139600  |
| O | 1.88921800  | -2.77571300 | 3.63471800  |
| C | 1.69407300  | -3.69383500 | 1.18992000  |
| O | 2.45286400  | -4.58750800 | 0.84298400  |

4\_L3

E(BP86)= -2505.41622041 Hartree

|    |             |             |             |
|----|-------------|-------------|-------------|
| Ru | -0.95286200 | -0.25849900 | -0.50639000 |
| O  | 3.03835600  | -2.21986300 | -2.08989500 |
| N  | -2.81232500 | 1.81256900  | -0.18384000 |
| N  | -0.87025700 | 2.84357100  | -0.05672100 |
| C  | -3.58410000 | 0.60467800  | -0.20923400 |
| C  | -4.36457000 | 0.19683500  | 0.89800000  |
| C  | -4.96475800 | -1.07094800 | 0.85889000  |
| C  | -4.76246800 | -1.96657900 | -0.21262700 |
| C  | -3.96305200 | -1.55497200 | -1.28548000 |
| C  | -3.35926700 | -0.27492100 | -1.31861000 |
| C  | -4.47437800 | 1.05739000  | 2.13470400  |
| C  | -5.36336500 | -3.35376900 | -0.17558700 |
| C  | -2.60117800 | 0.17950300  | -2.55058000 |
| C  | -3.21844200 | 3.20751600  | 0.05518100  |
| C  | -1.86092400 | 3.94580600  | -0.08971400 |
| C  | -1.44985500 | 1.62532500  | -0.20475800 |
| C  | 0.53908600  | 3.08964800  | -0.04038900 |
| C  | 1.16092500  | 3.34945200  | 1.20007400  |
| C  | 2.54713600  | 3.57827700  | 1.20843000  |
| C  | 3.31383200  | 3.51423700  | 0.03136100  |
| C  | 2.65597100  | 3.25902100  | -1.18485500 |
| C  | 1.26925100  | 3.05137800  | -1.24693300 |
| C  | 0.37214100  | 3.28310300  | 2.48701900  |
| C  | 4.81857800  | 3.63494600  | 0.08065300  |
| C  | 0.57956100  | 2.75548200  | -2.55643700 |
| C  | 3.31247000  | -1.42465400 | -1.00763900 |
| C  | 2.25107700  | -0.58035800 | -0.57038400 |
| C  | 2.49468600  | 0.26992800  | 0.51753400  |
| C  | 3.73182400  | 0.29055100  | 1.17698200  |
| C  | 4.75220000  | -0.57320200 | 0.75754700  |
| C  | 4.54581600  | -1.43349700 | -0.33213500 |
| C  | 0.90941600  | -0.65291300 | -1.23134600 |
| H  | -5.56577200 | -1.39218800 | 1.71829600  |
| H  | -3.79103300 | -2.23563400 | -2.12737900 |

|   |             |             |             |
|---|-------------|-------------|-------------|
| H | -3.47396200 | 1.39672500  | 2.46039900  |
| H | -4.92264300 | 0.48707000  | 2.96429300  |
| H | -5.09934600 | 1.95666400  | 1.97558400  |
| H | -5.31247000 | -3.84311100 | -1.16287100 |
| H | -6.42107700 | -3.32898400 | 0.14197800  |
| H | -4.82204800 | -3.99784300 | 0.54270700  |
| H | -2.83064900 | 1.22800600  | -2.80829100 |
| H | -2.82259400 | -0.47668500 | -3.40783900 |
| H | -1.46269400 | 0.16978400  | -2.47520500 |
| H | -3.64866900 | 3.33498100  | 1.06478300  |
| H | -3.96570000 | 3.54046700  | -0.68537700 |
| H | -1.77998700 | 4.49053300  | -1.04980100 |
| H | -1.67548000 | 4.66279500  | 0.72712300  |
| H | 3.04729500  | 3.76586500  | 2.16650500  |
| H | 3.24216200  | 3.20095000  | -2.11006800 |
| H | -0.47144100 | 3.99776300  | 2.50789900  |
| H | 1.01748900  | 3.50169900  | 3.35347900  |
| H | -0.05317100 | 2.27163700  | 2.62521700  |
| H | 5.22364800  | 4.08585700  | -0.84175700 |
| H | 5.26911600  | 2.62918000  | 0.18512100  |
| H | 5.15272800  | 4.24116400  | 0.94019200  |
| H | 0.15534700  | 1.73567200  | -2.53787900 |
| H | 1.28558400  | 2.82625700  | -3.39990700 |
| H | -0.25757100 | 3.45158400  | -2.75044600 |
| H | 1.67807600  | 0.90650300  | 0.85470000  |
| H | 3.87954200  | 0.95966700  | 2.03055500  |
| H | 5.71379900  | -0.59394800 | 1.28252000  |
| H | 5.34242100  | -2.11134300 | -0.64925900 |
| H | 0.99203200  | -0.45558800 | -2.31979900 |
| C | 3.80187200  | -3.42603600 | -2.22741000 |
| H | 4.85518700  | -3.21824600 | -2.49800100 |
| H | 3.75122800  | -4.01967600 | -1.29674000 |
| H | 3.32414600  | -3.98158800 | -3.04828500 |
| C | 0.70761800  | -2.82920500 | 0.46542600  |
| C | 0.44469300  | -2.06303100 | 1.61428600  |
| S | -0.41269900 | -0.59627000 | 1.72076300  |
| S | 0.17793700  | -2.45030300 | -1.16339900 |
| C | 1.32622800  | -2.97180200 | 2.47704700  |
| O | 1.67120400  | -3.00551900 | 3.63883400  |
| C | 1.63512600  | -3.77613200 | 1.13218200  |
| O | 2.37641100  | -4.68789200 | 0.79701500  |
